# Supplementary material for: Nationwide Genomic Study in Denmark Reveals Remarkable Population Homogeneity
Source: Oxford University Press journal article supplement (doi:10.1534/genetics.116.189241), 2016-08-18

**nor vs nor**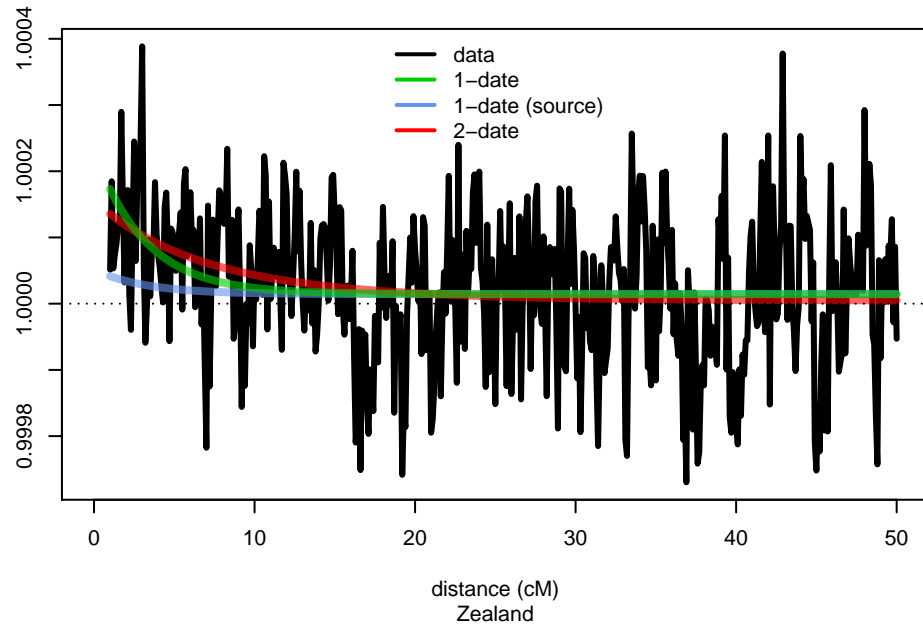**nor vs swe**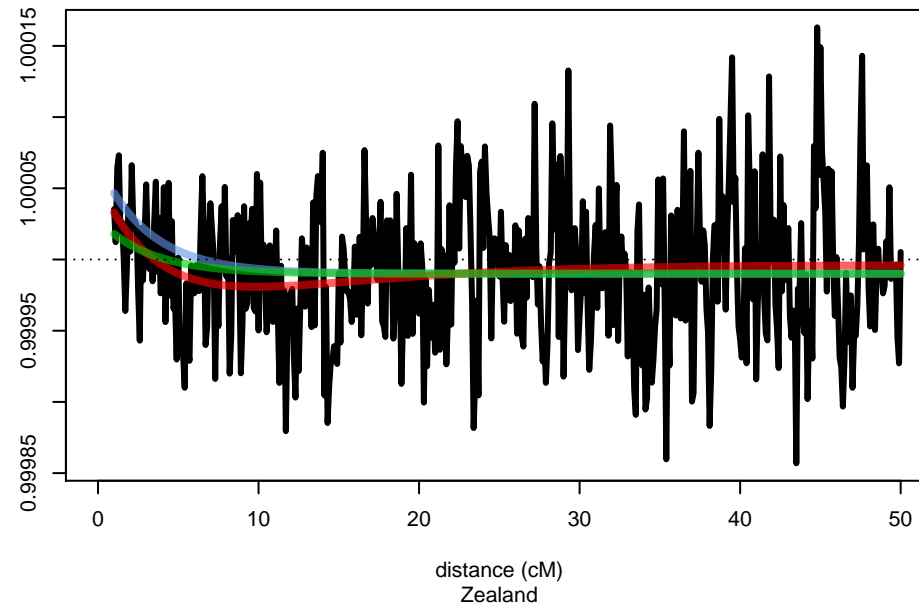**nor vs ger**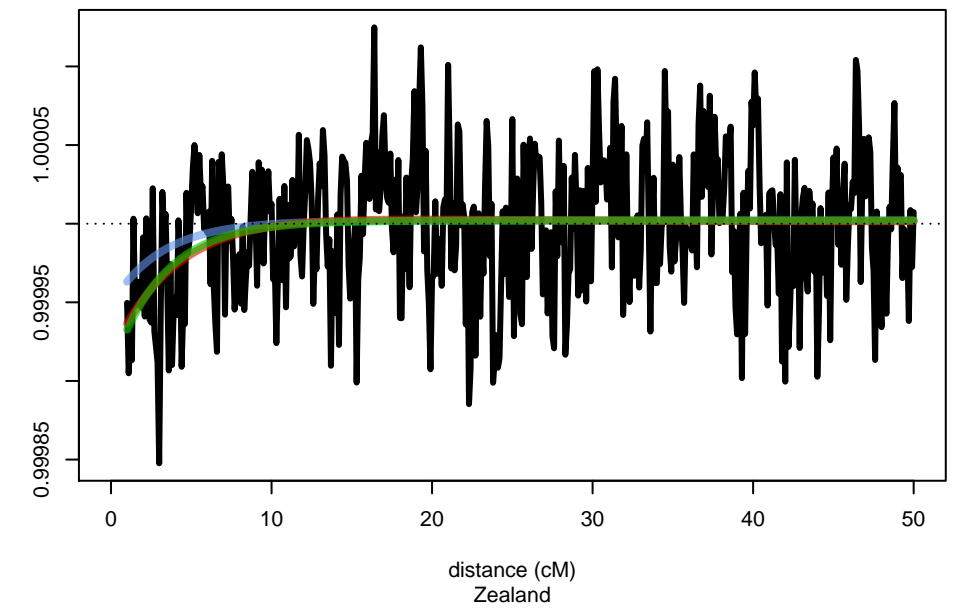**nor vs bri**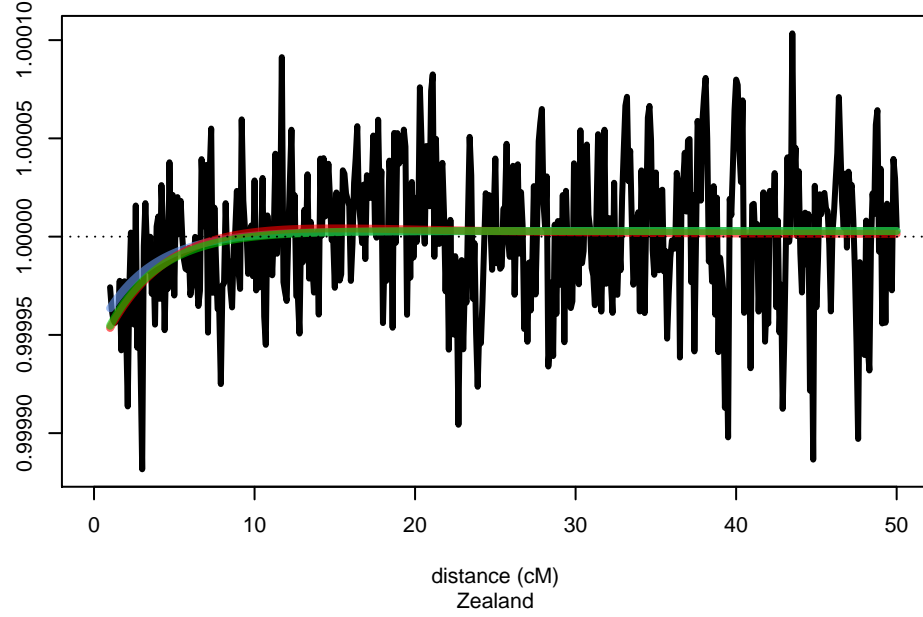**nor vs fra**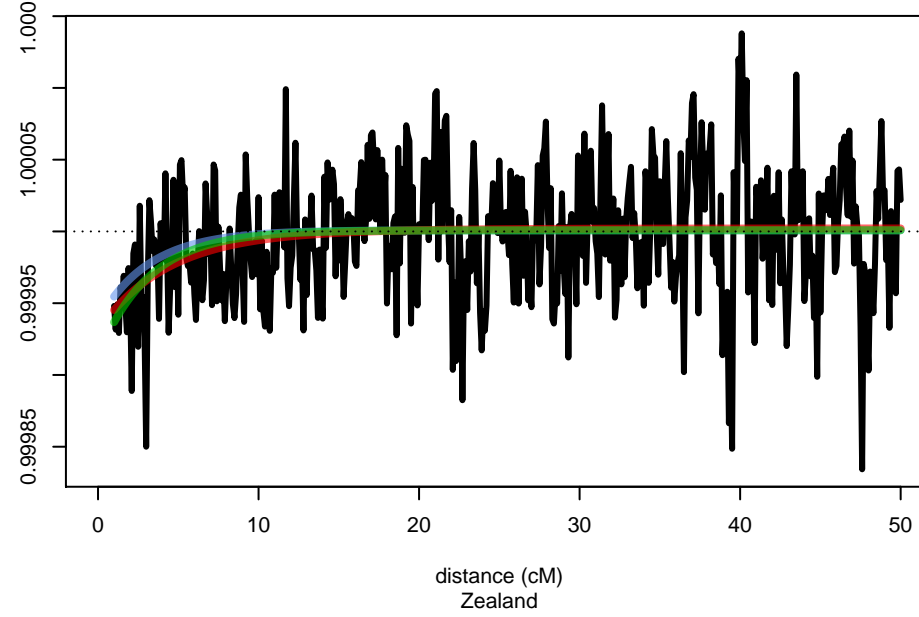**nor vs fin**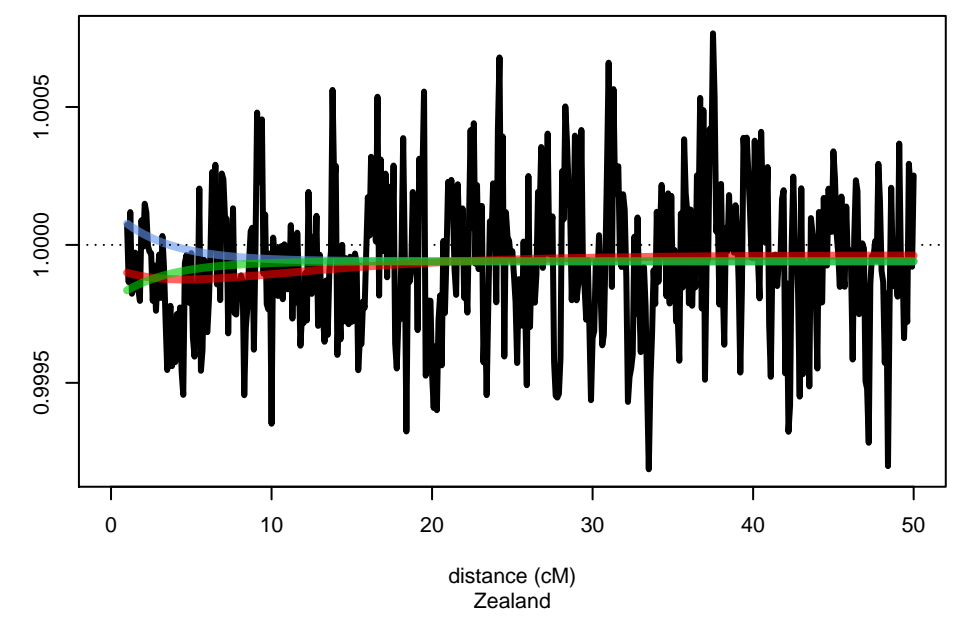**swe vs nor**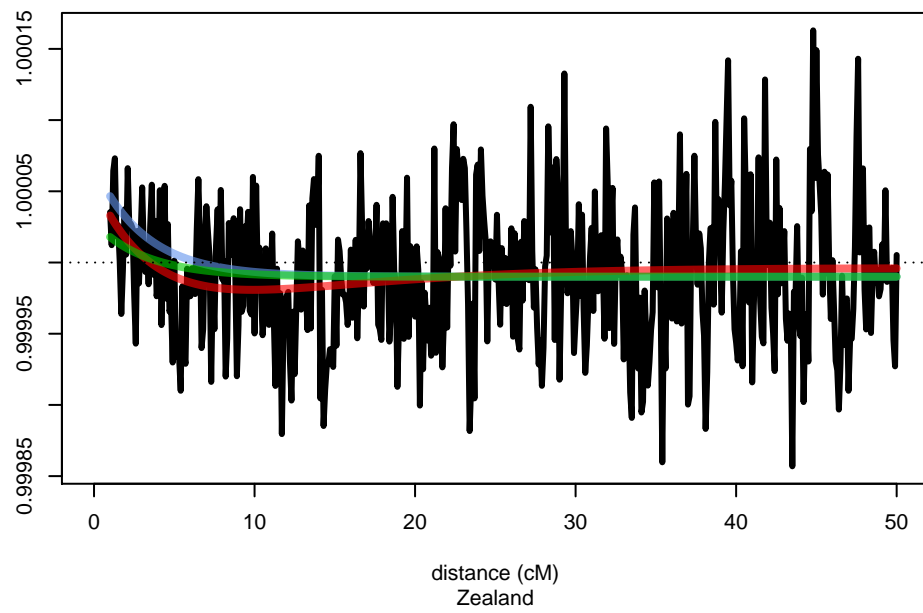**swe vs swe**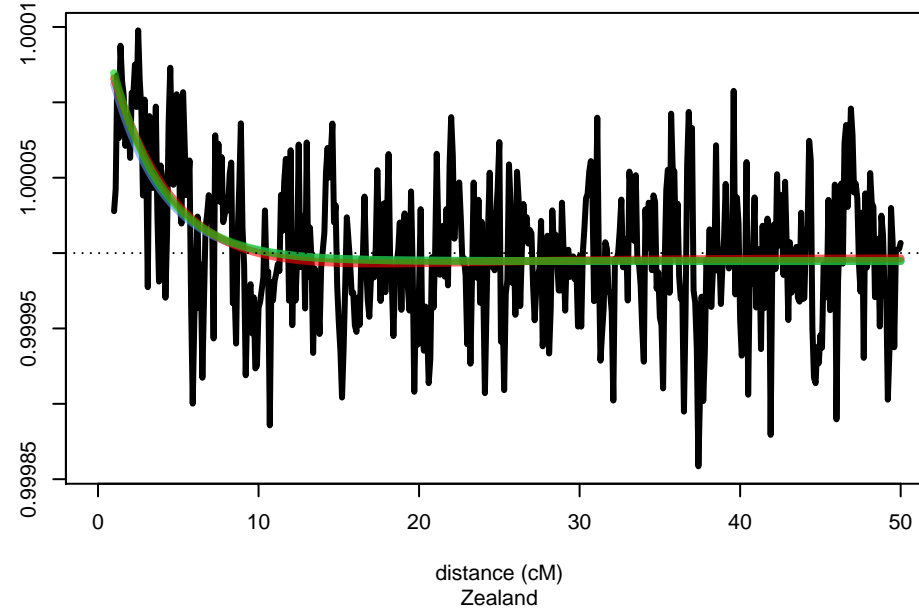**swe vs ger**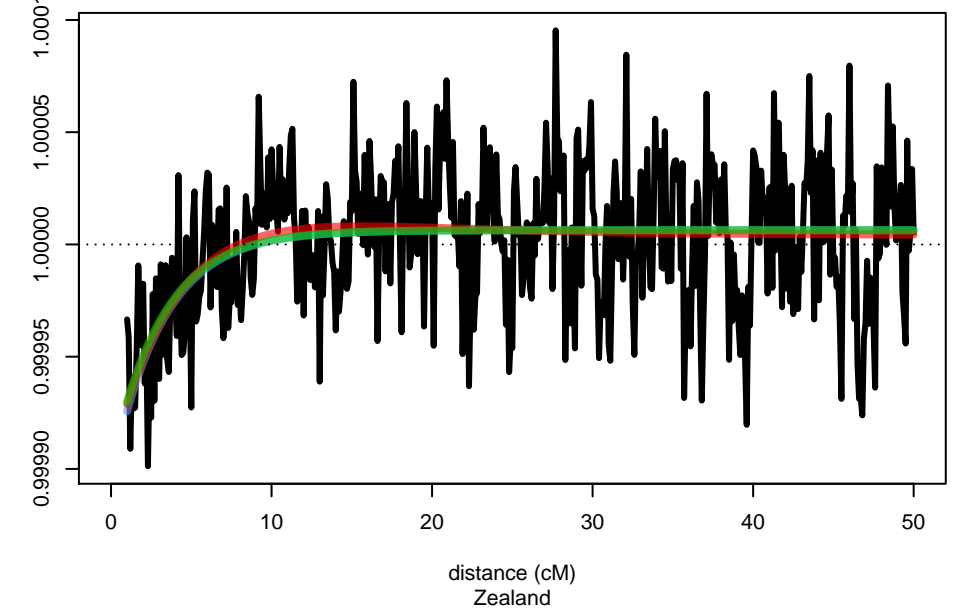

**swe vs bri**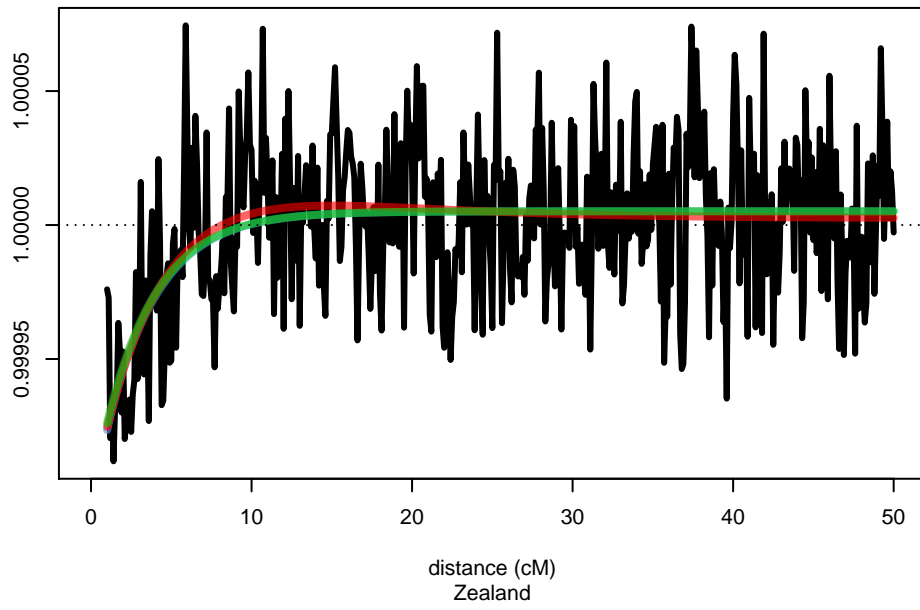**swe vs fra**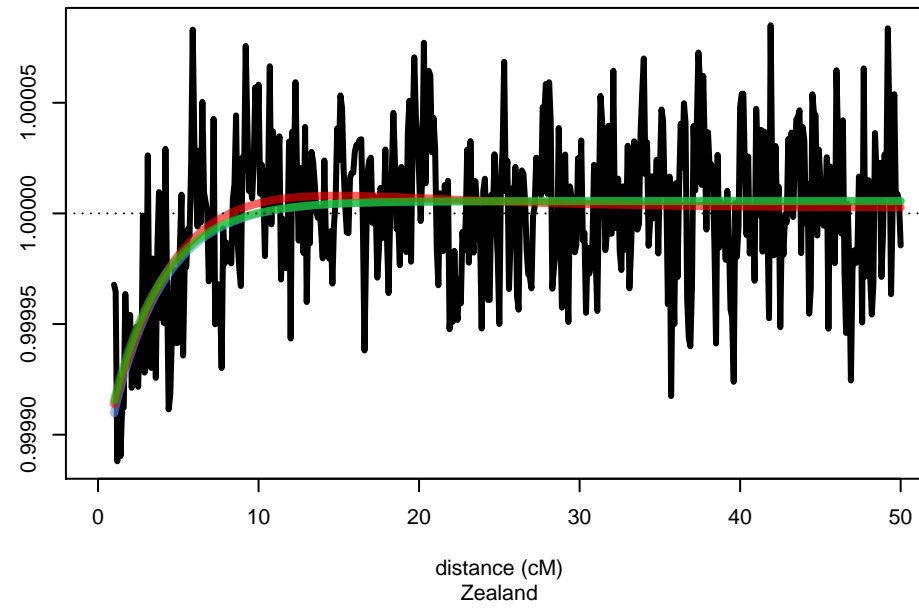**swe vs fin**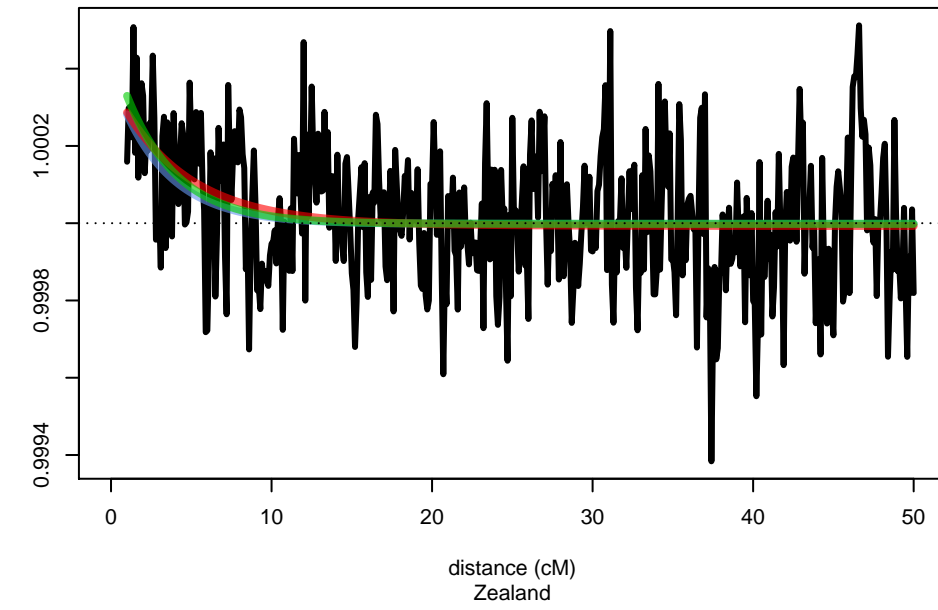**ger vs nor**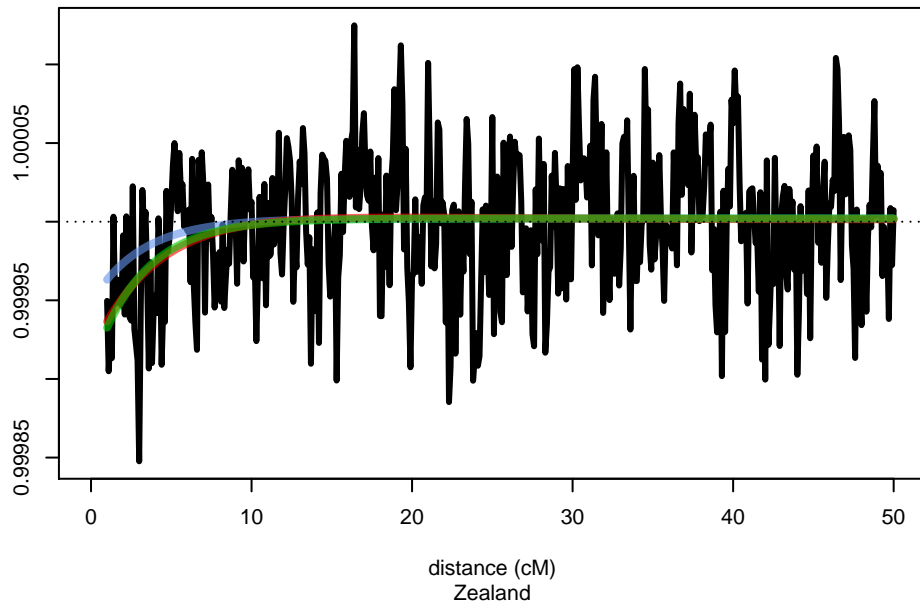**ger vs swe**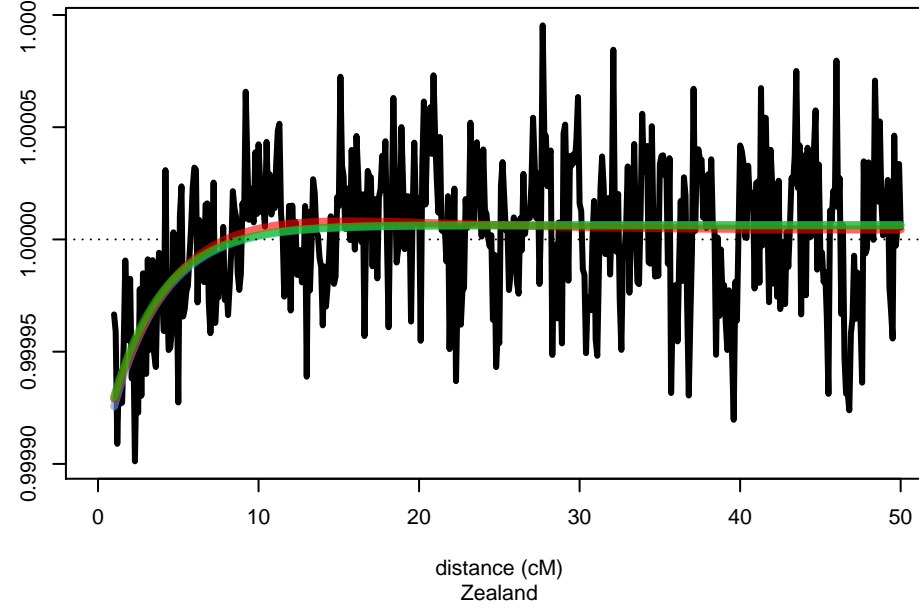**ger vs ger**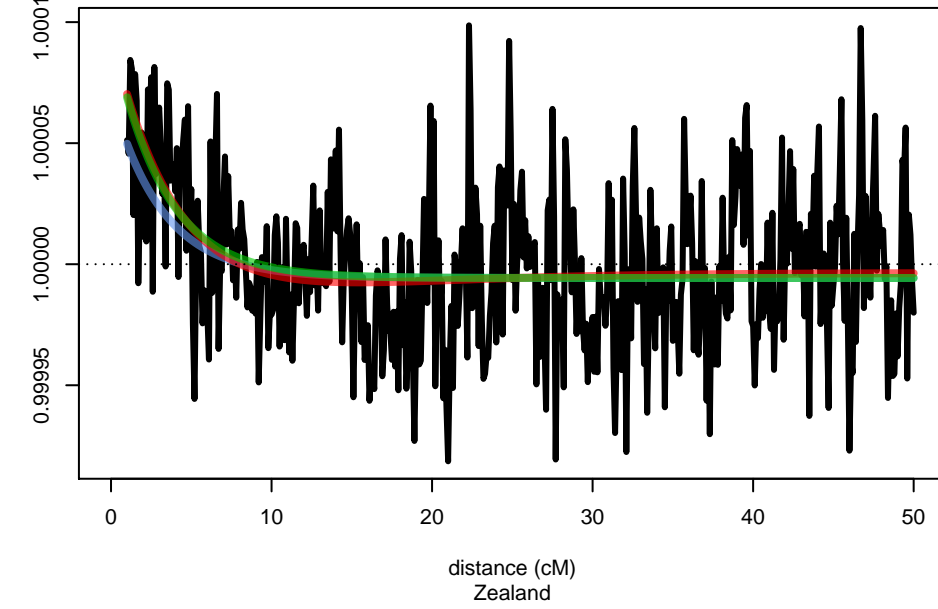**ger vs bri**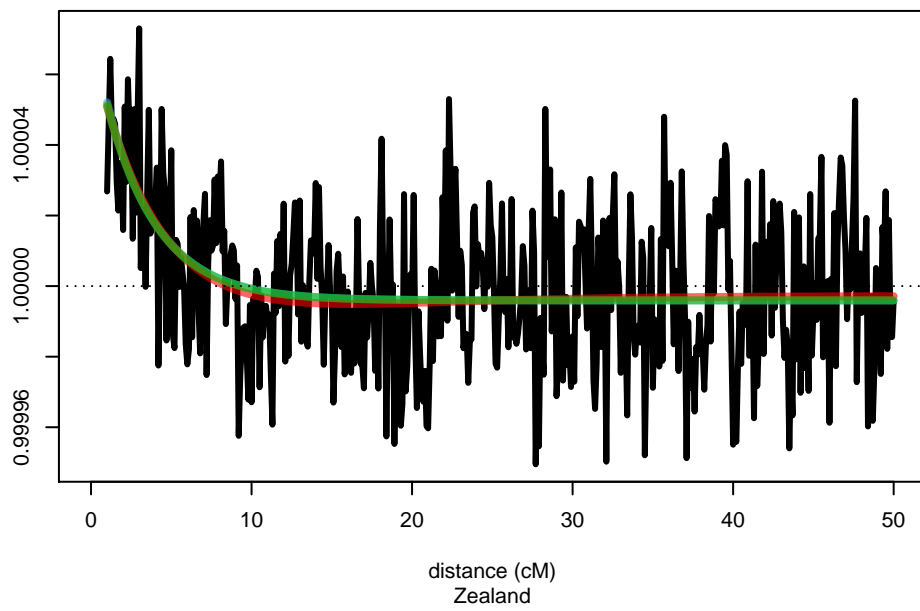**ger vs fra**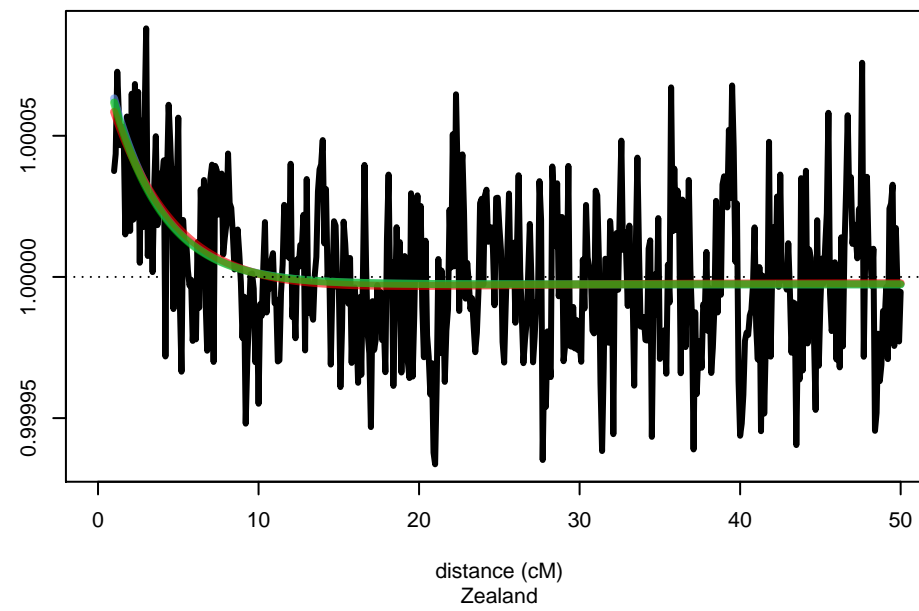**ger vs fin**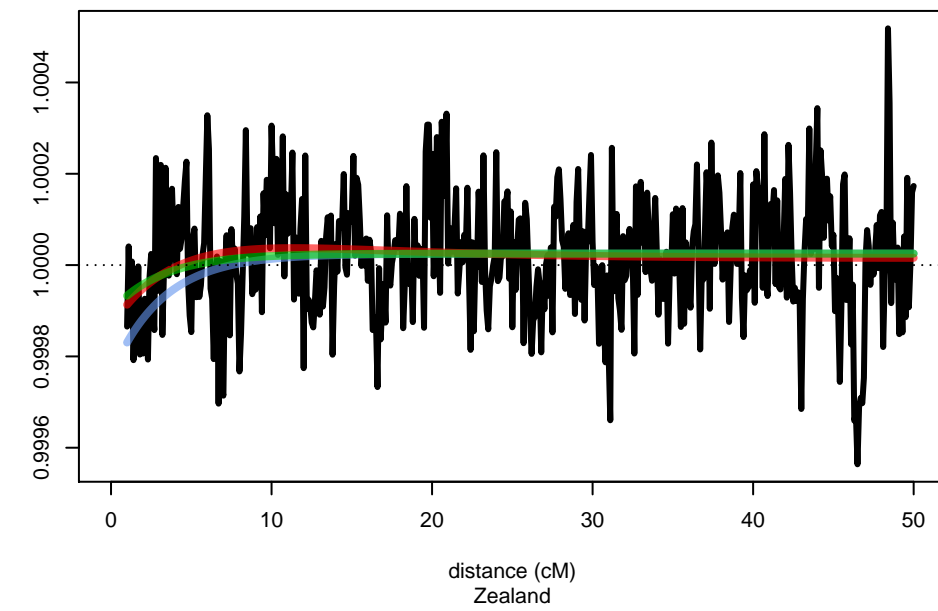

**bri vs nor**

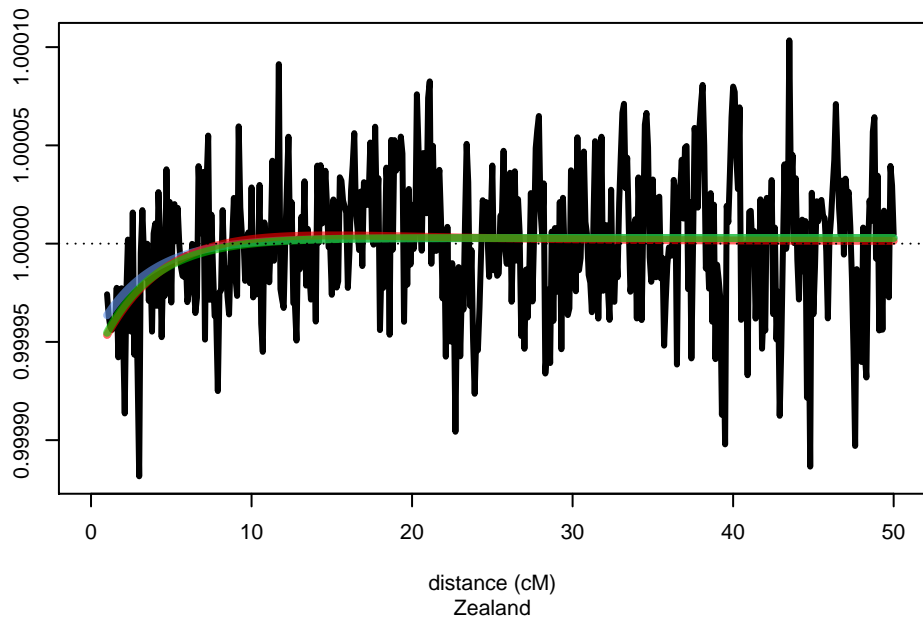

**bri vs swe**

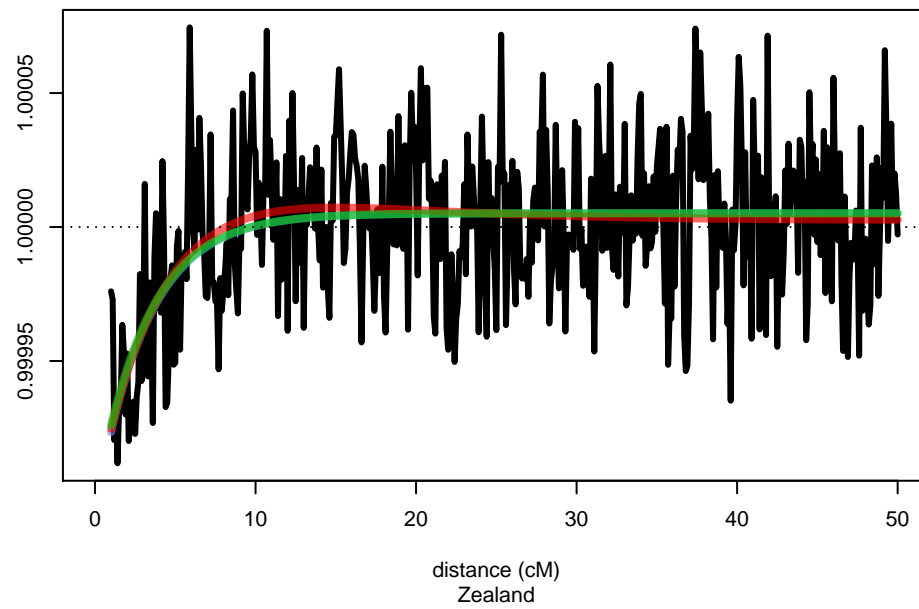

**bri vs ger**

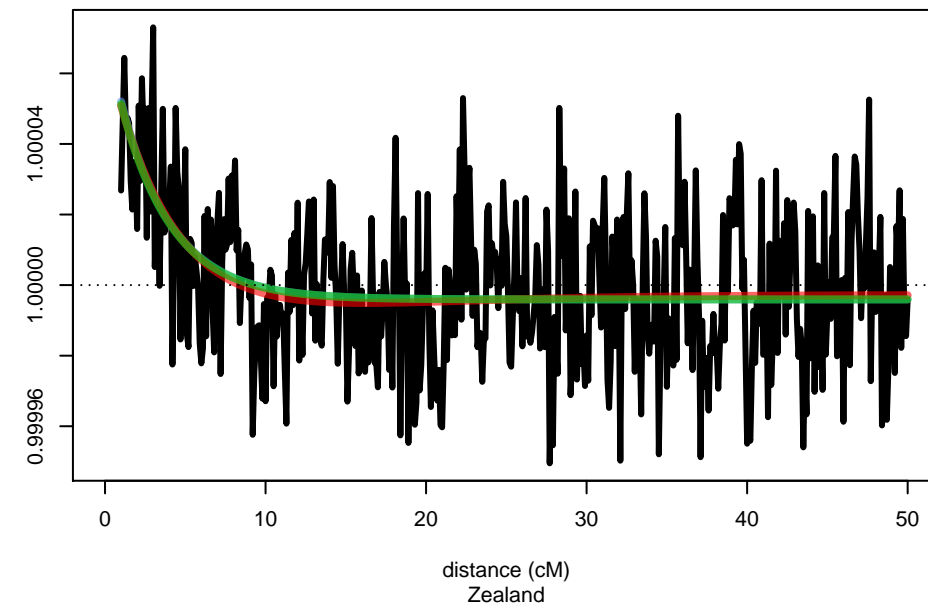

**bri vs bri**

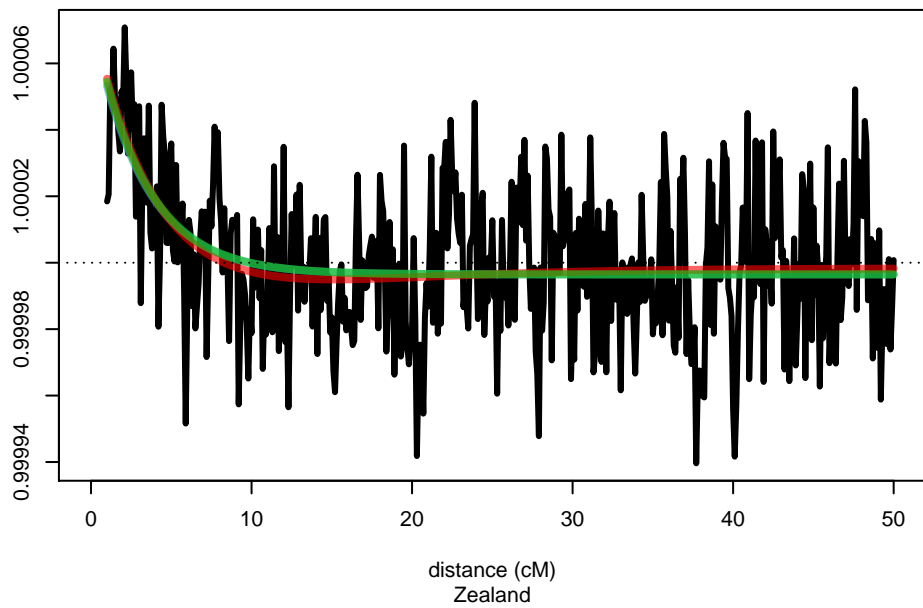

**bri vs fra**

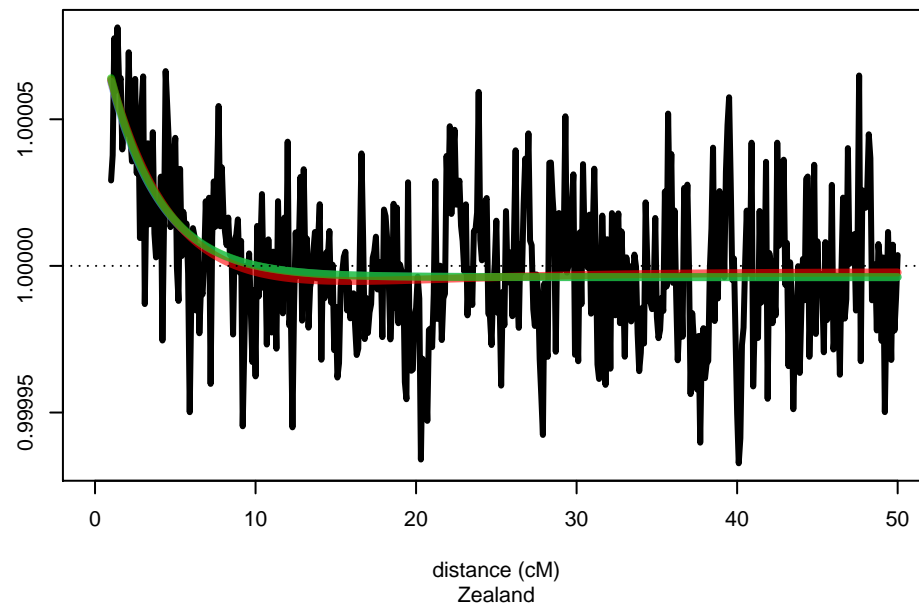

**bri vs fin**

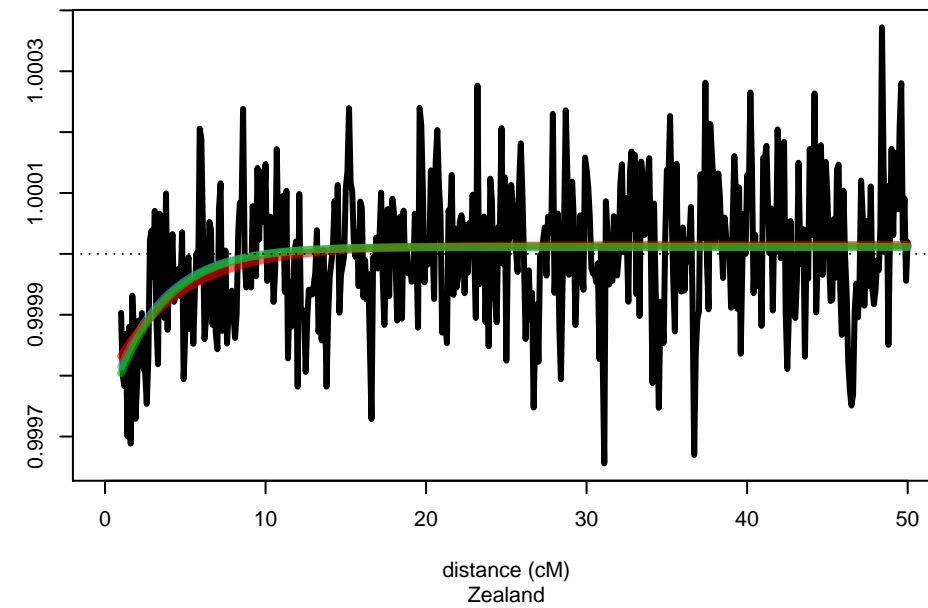

**fra vs nor**

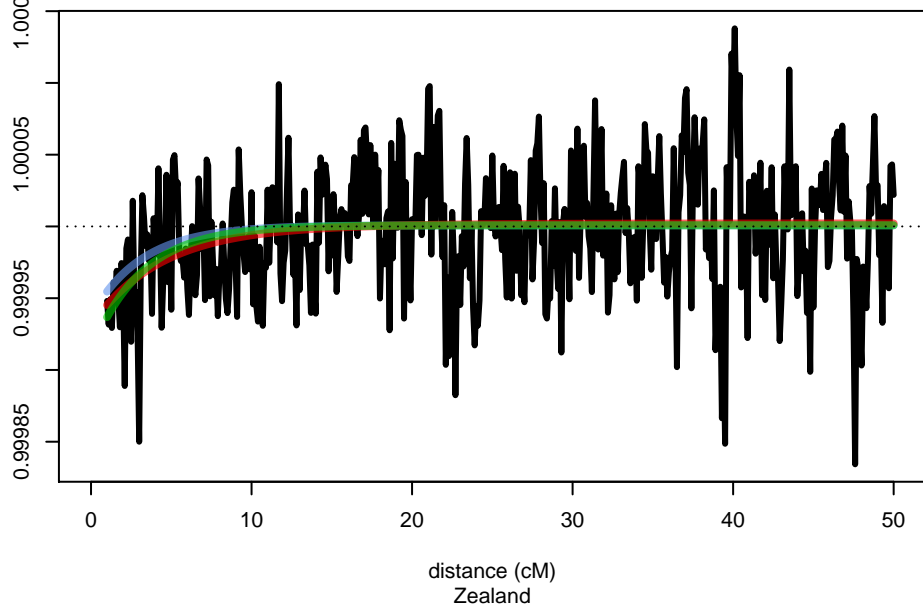

**fra vs swe**

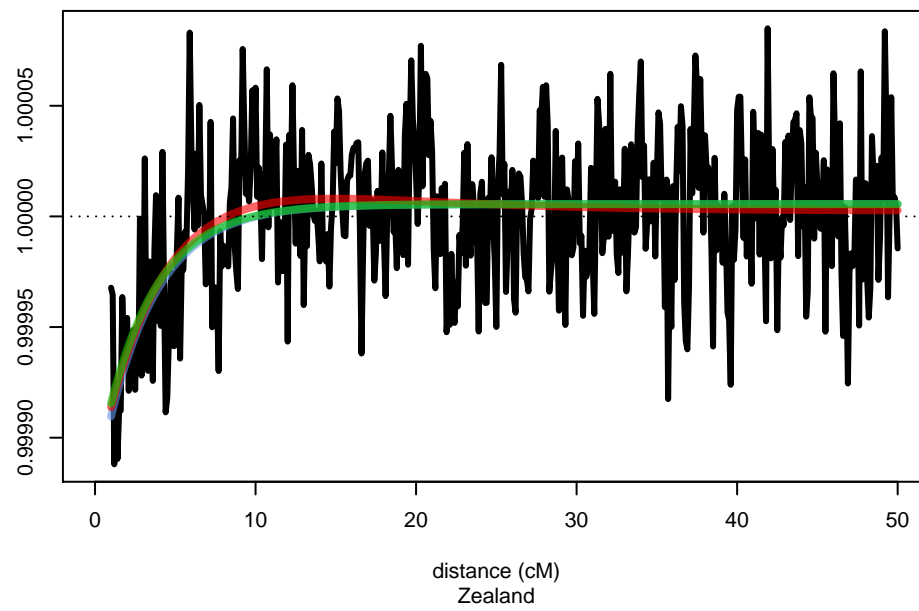

**fra vs ger**

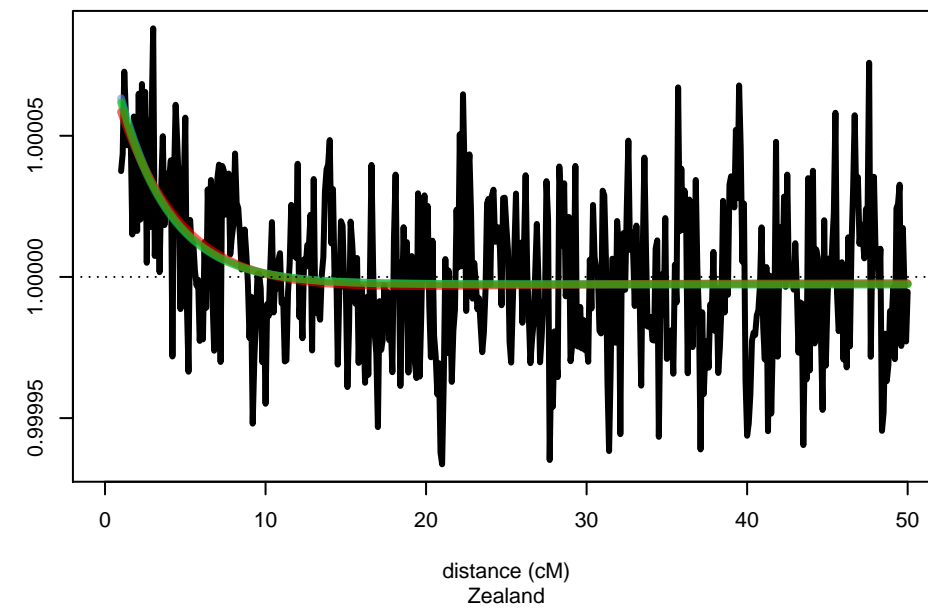

**fra vs bri**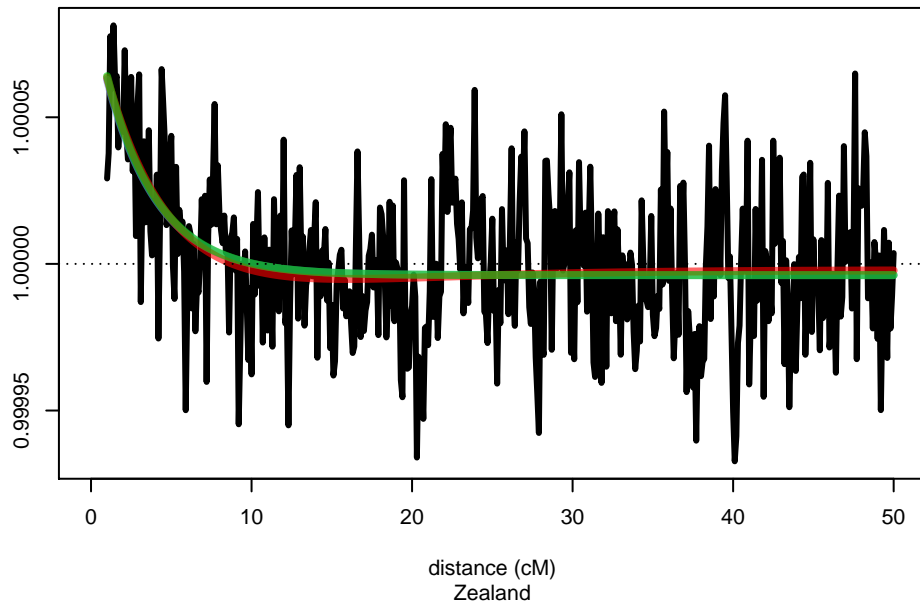**fra vs fra**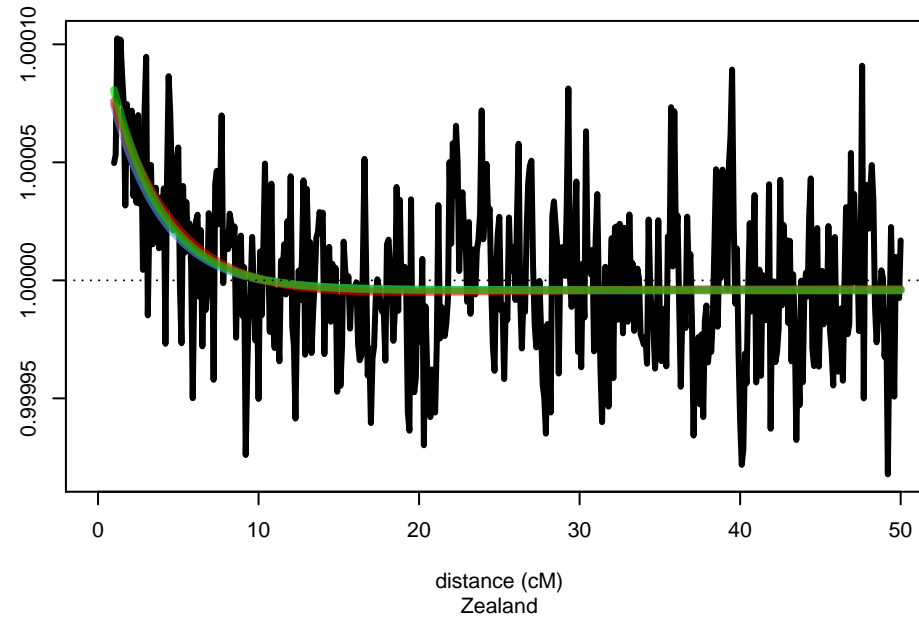**fra vs fin**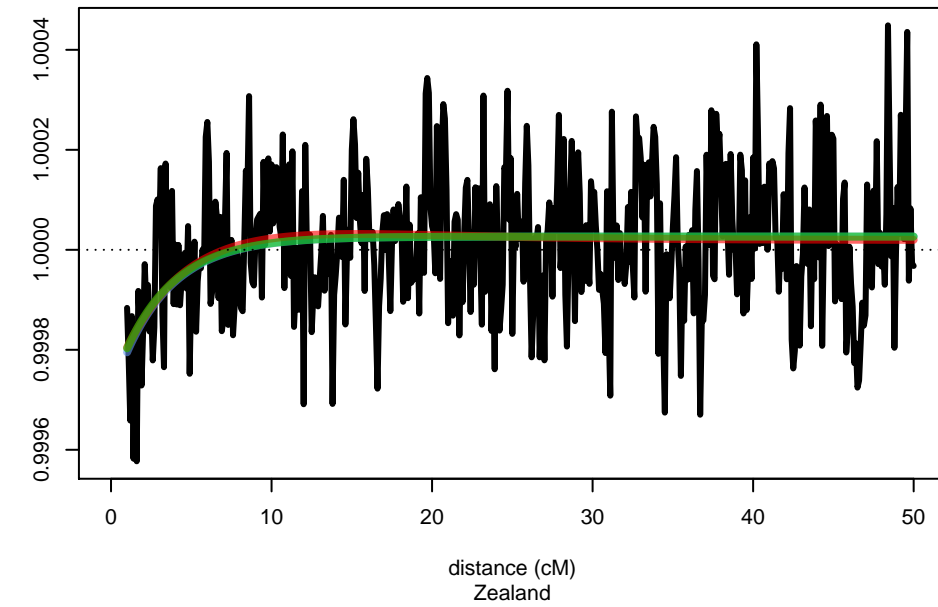**fin vs nor**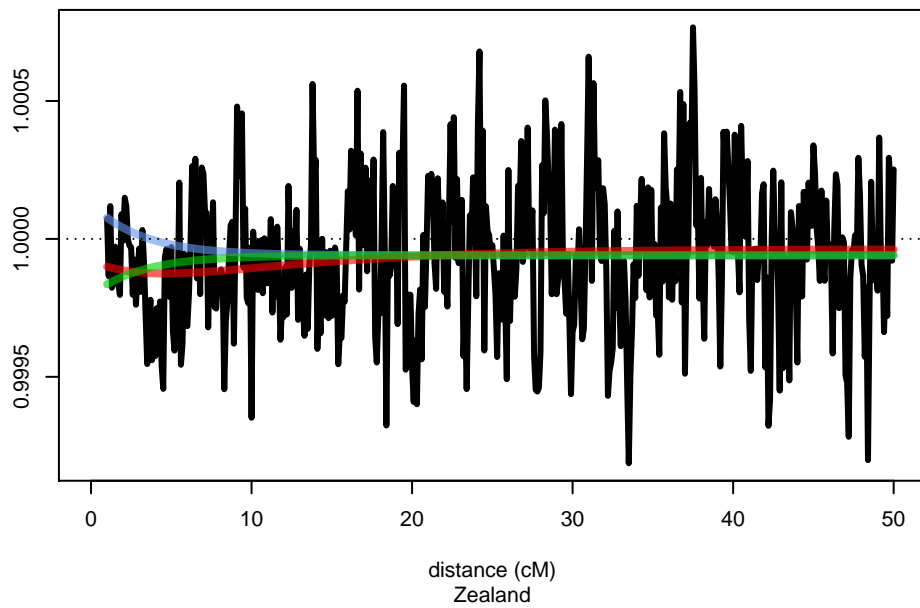**fin vs swe**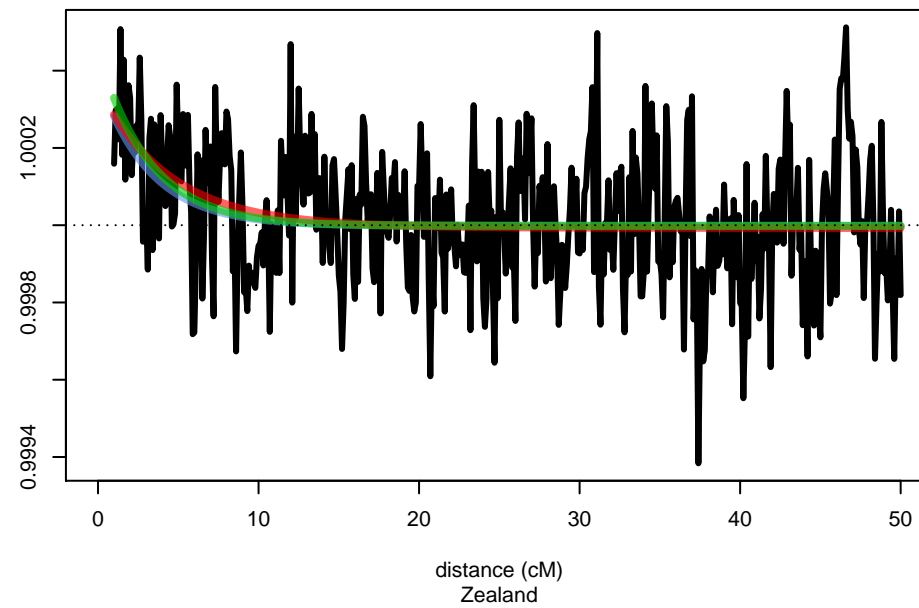**fin vs ger**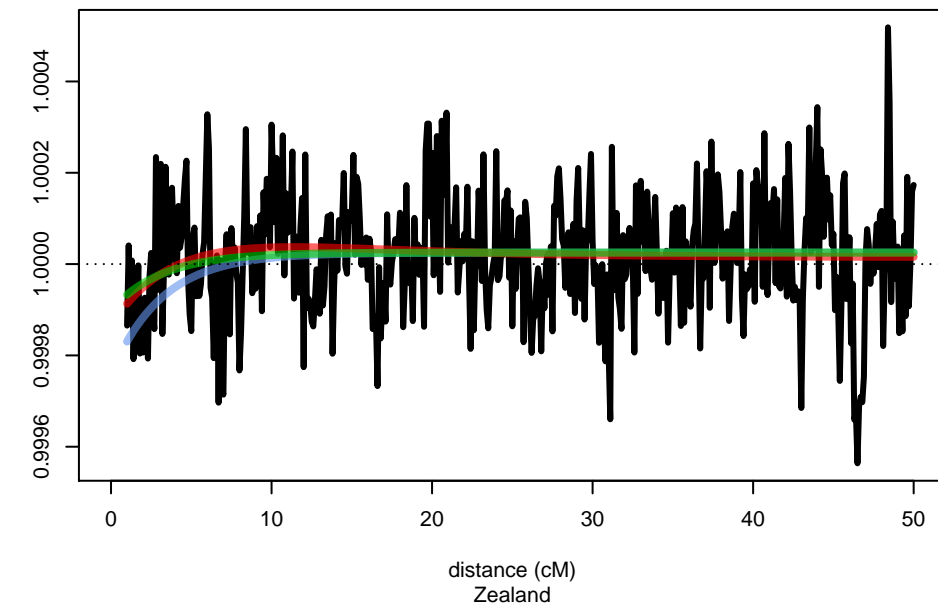**fin vs bri**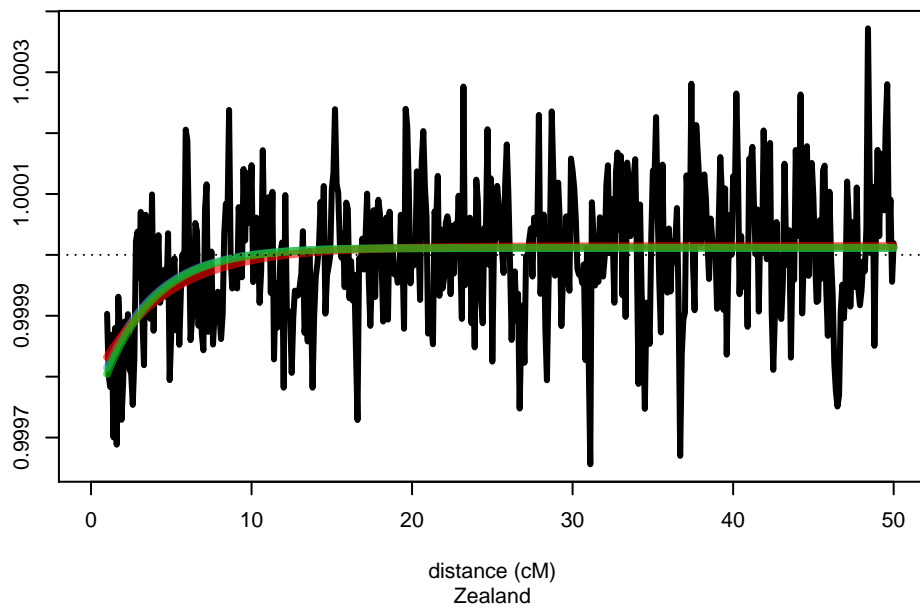**fin vs fra**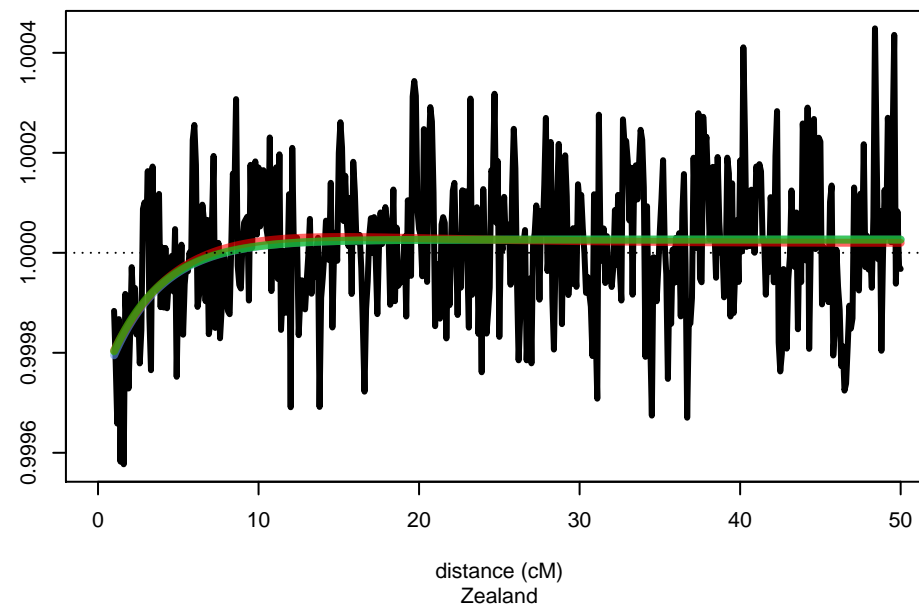**fin vs fin**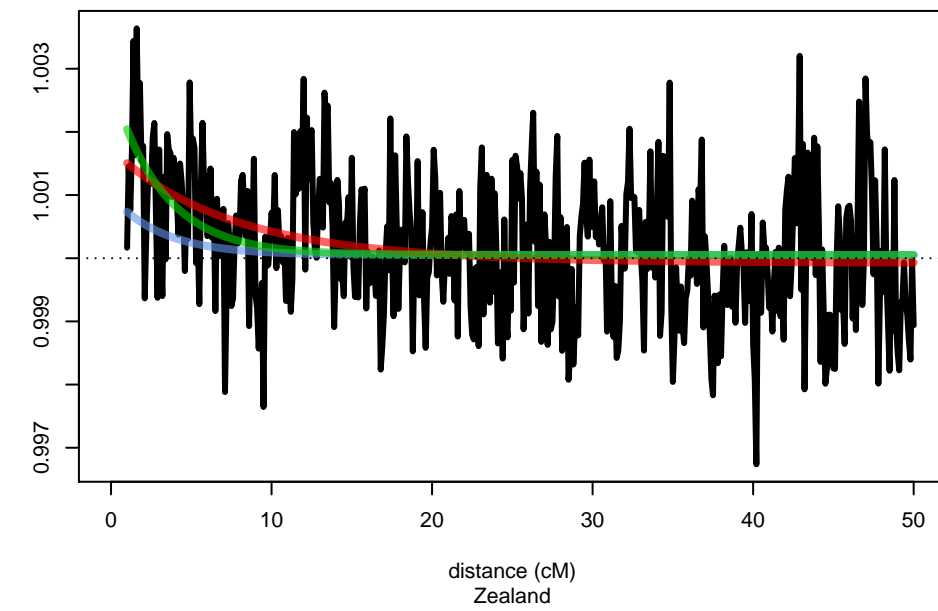

Supplement: figures1.pdf [file figures1.pdf]
