# Supplementary material for: Nationwide Genomic Study in Denmark Reveals Remarkable Population Homogeneity
Source: Oxford University Press journal article supplement (doi:10.1534/genetics.116.189241), 2016-08-18

**nor vs nor**

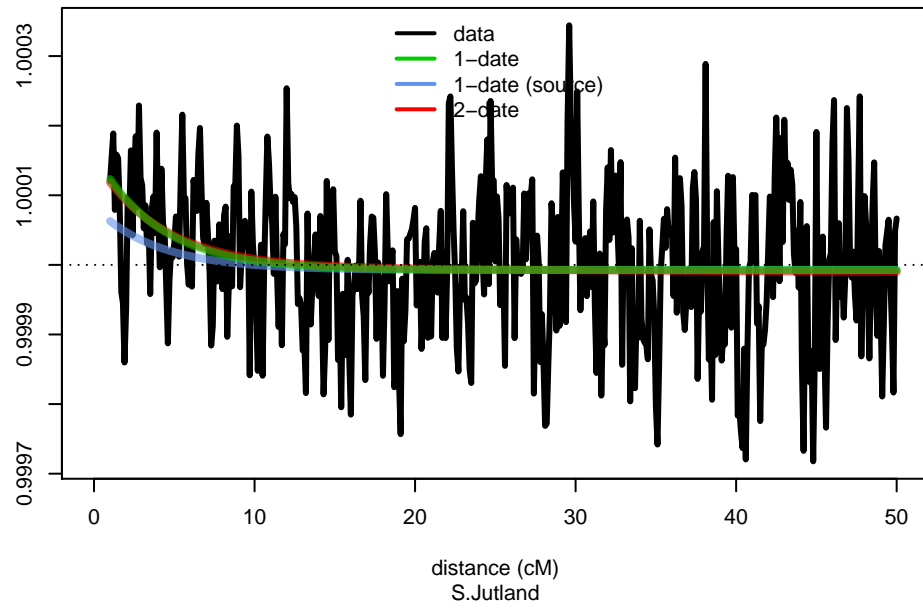

**nor vs swe**

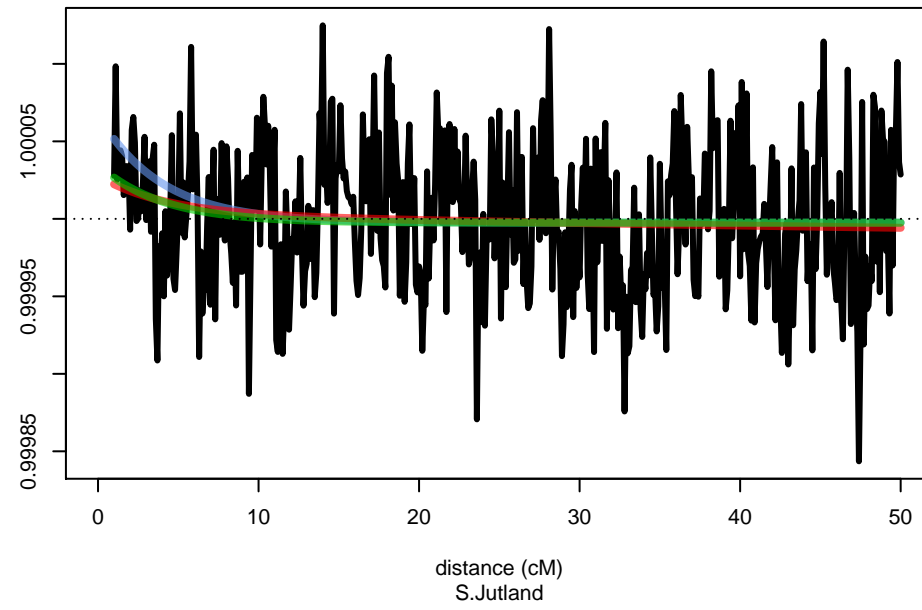

**nor vs ger**

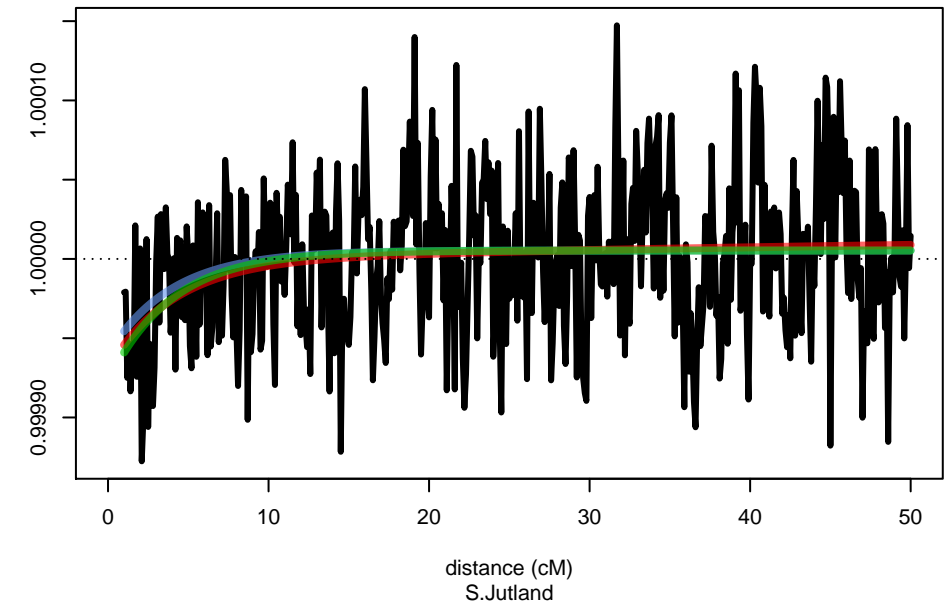

**nor vs bri**

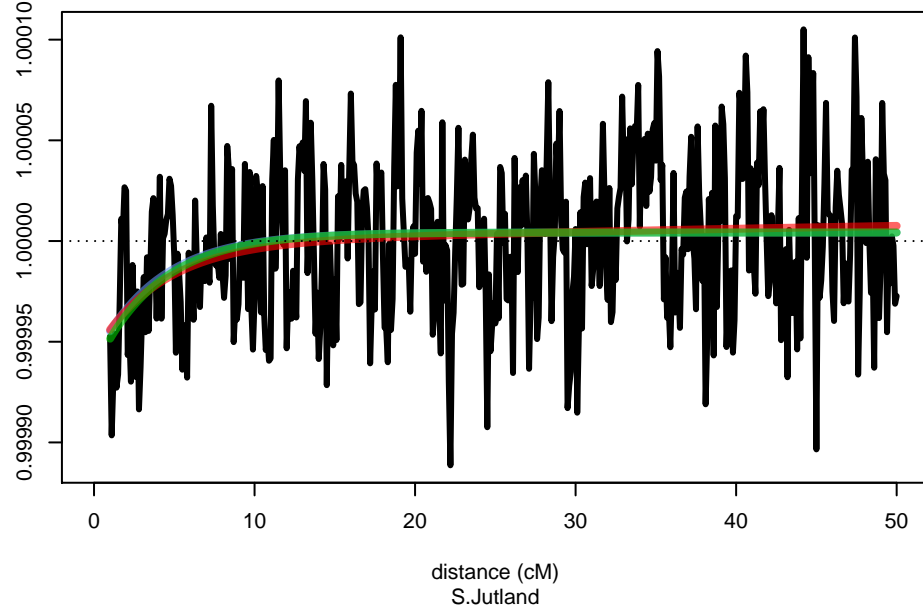

**nor vs pol**

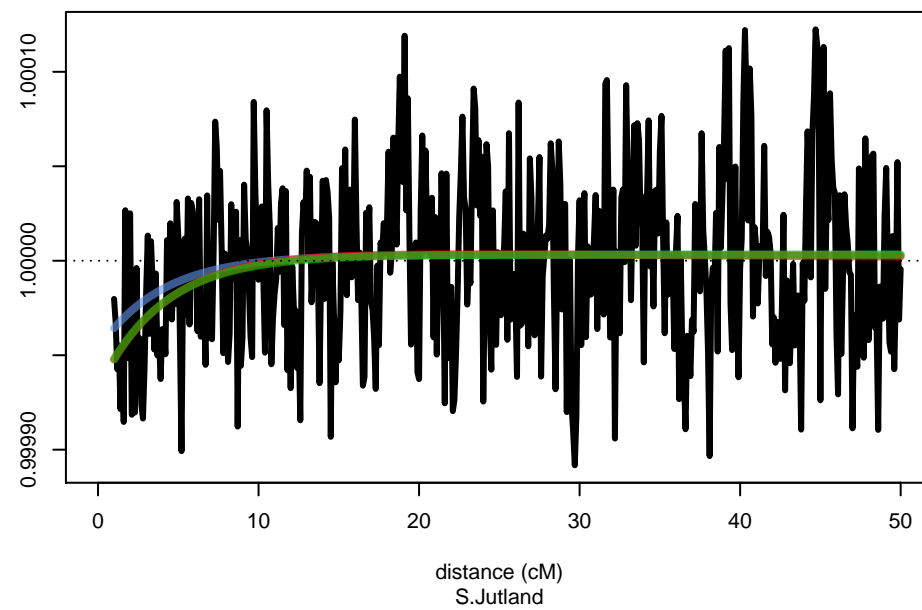

**nor vs fra**

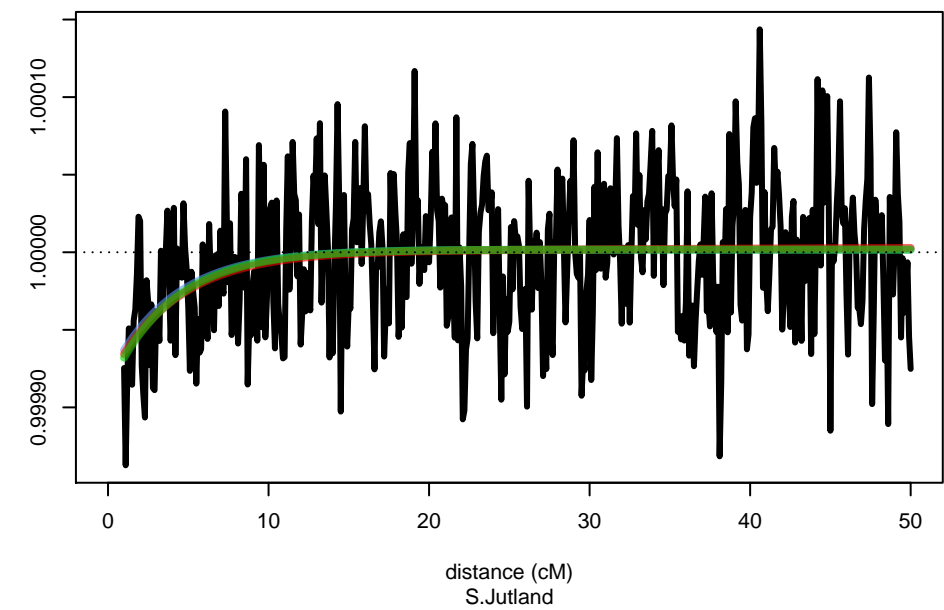

**swe vs nor**

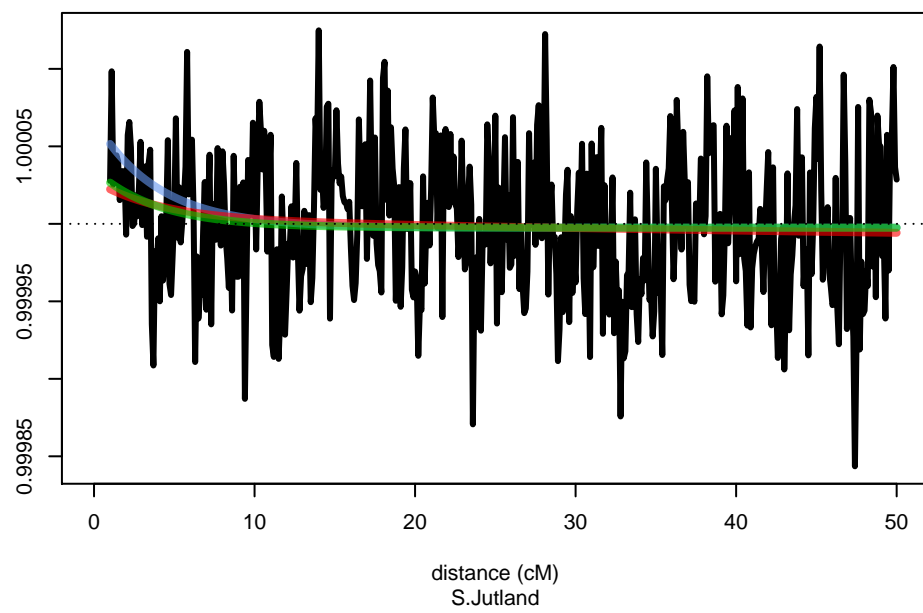

**swe vs swe**

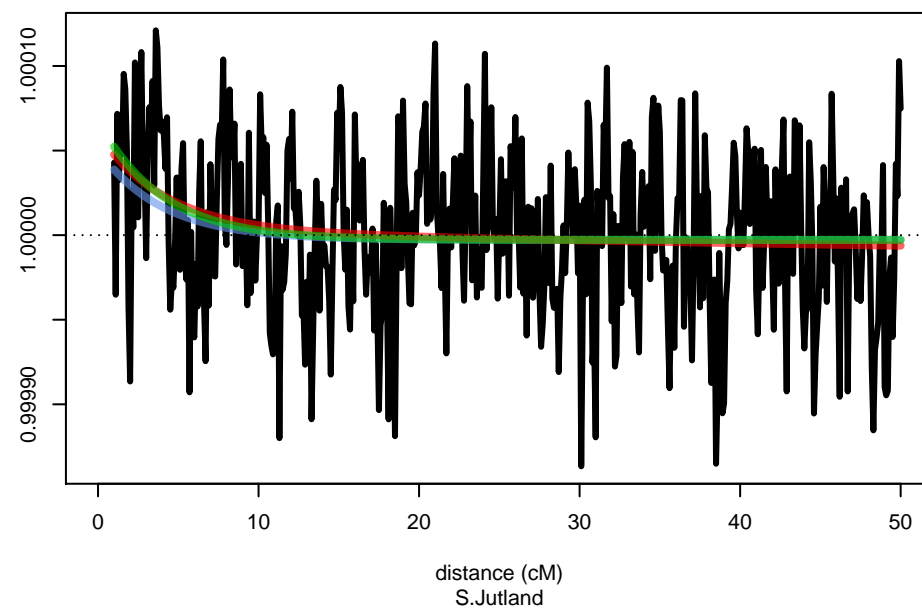

**swe vs ger**

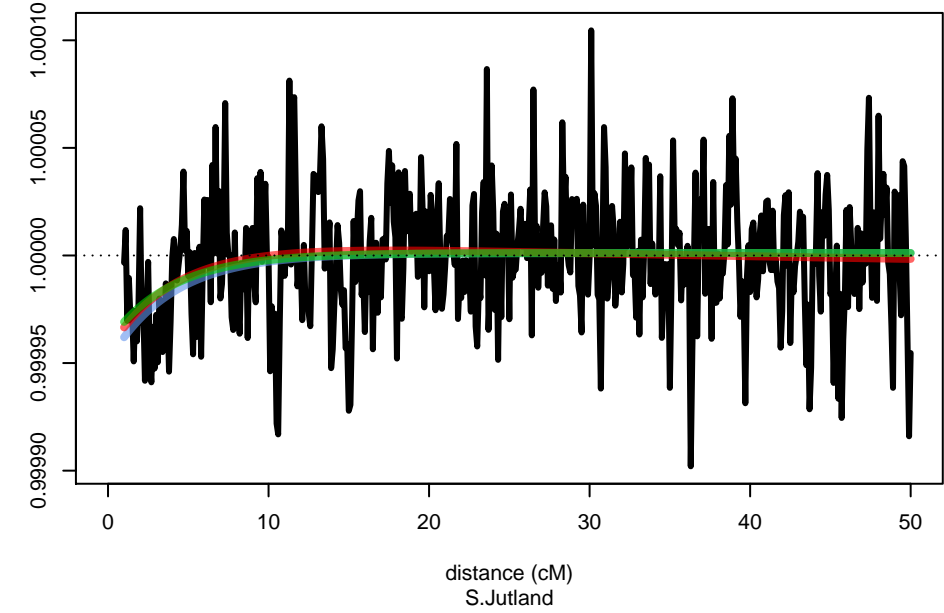

**swe vs bri**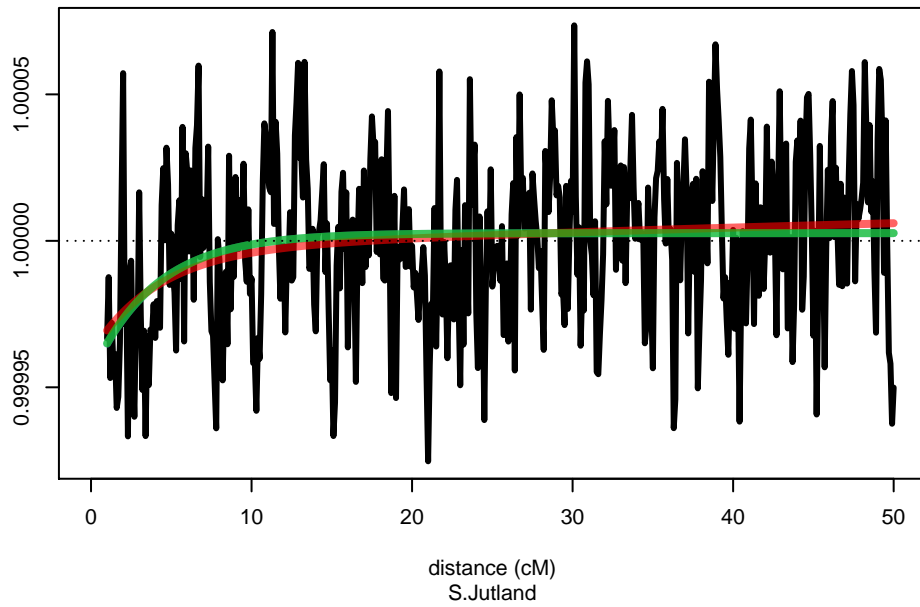**swe vs pol**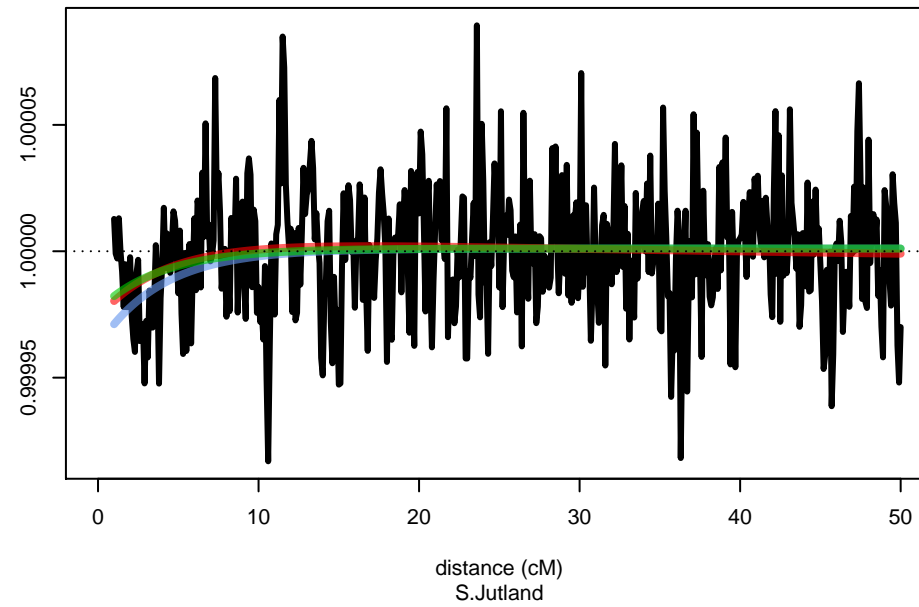**swe vs fra**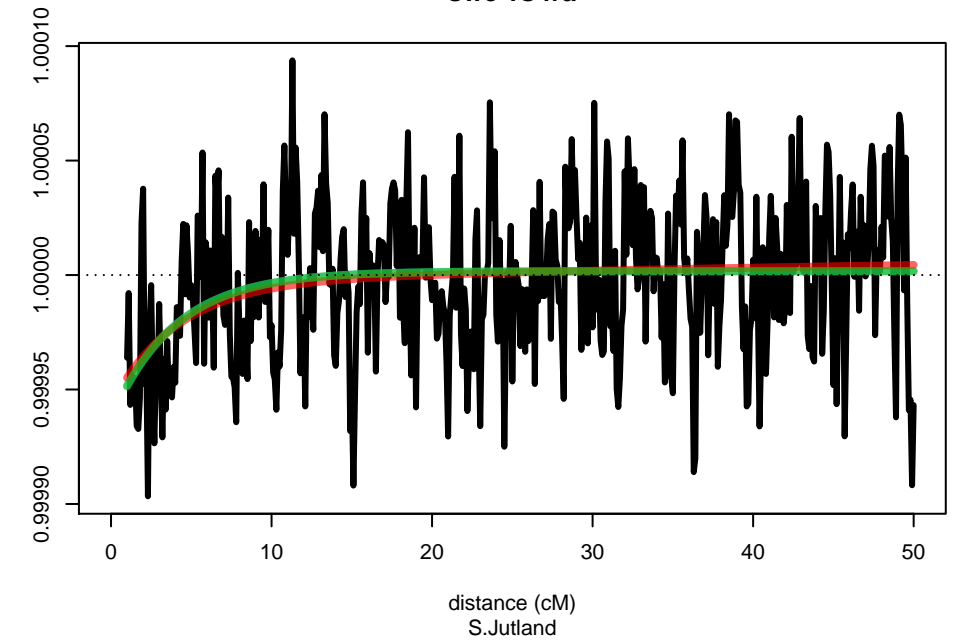**ger vs nor**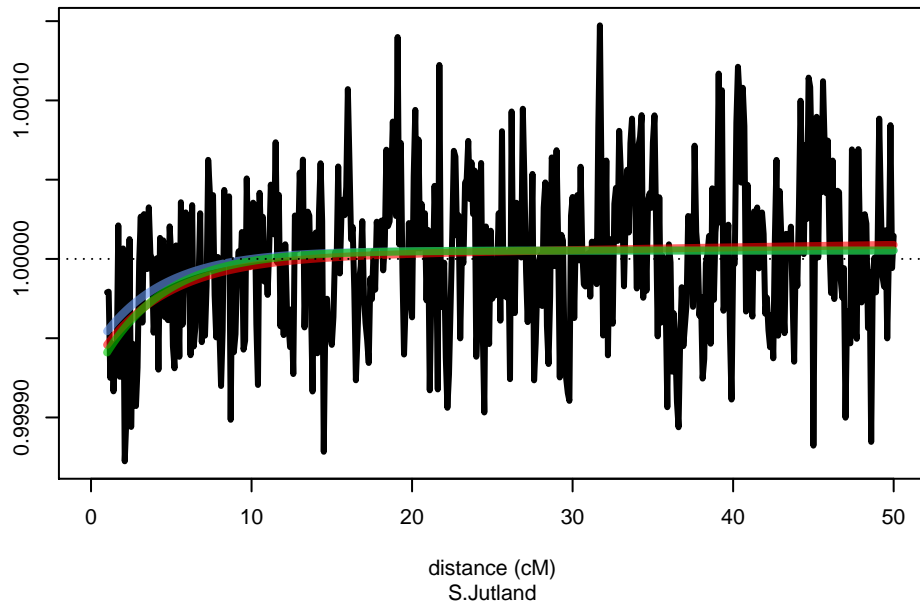**ger vs swe**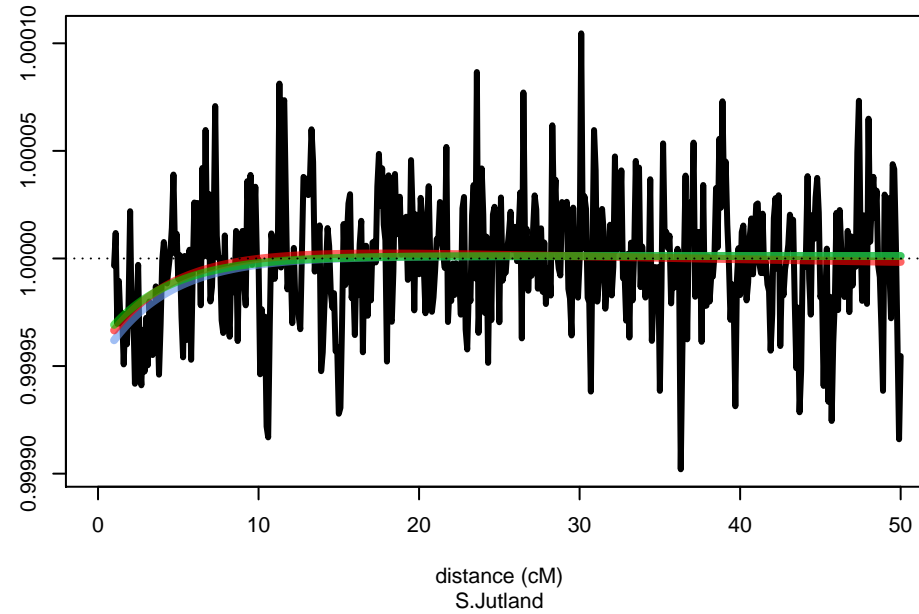**ger vs ger**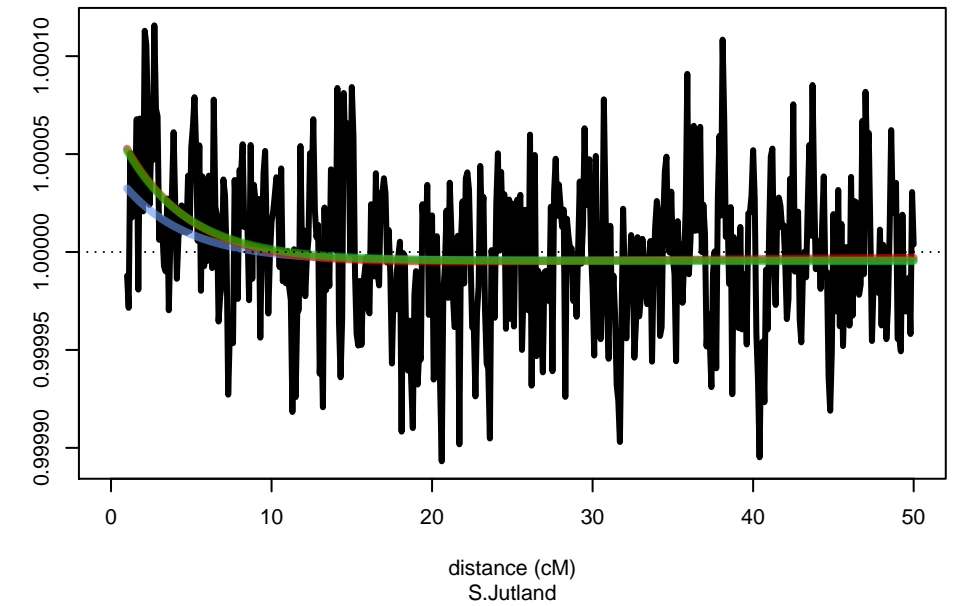**ger vs bri**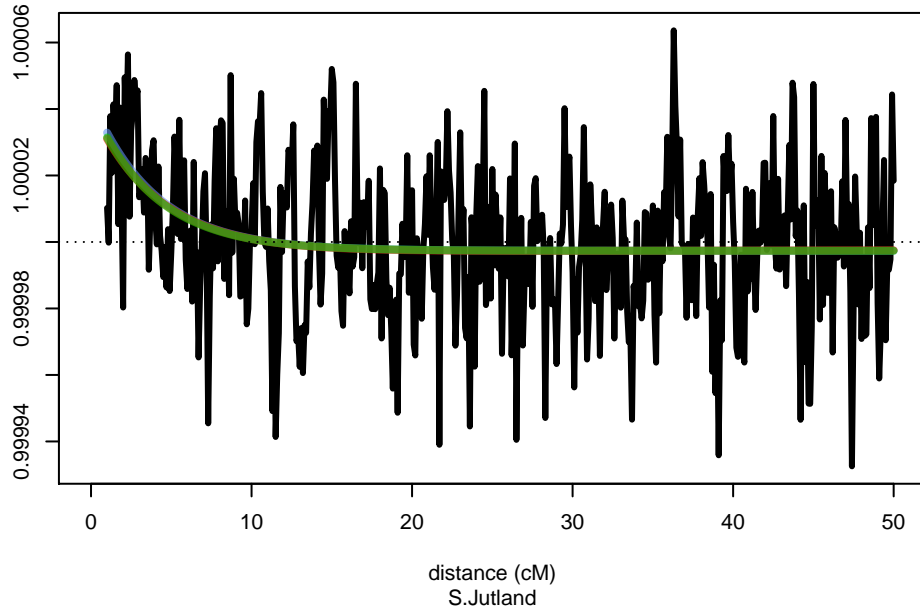**ger vs pol**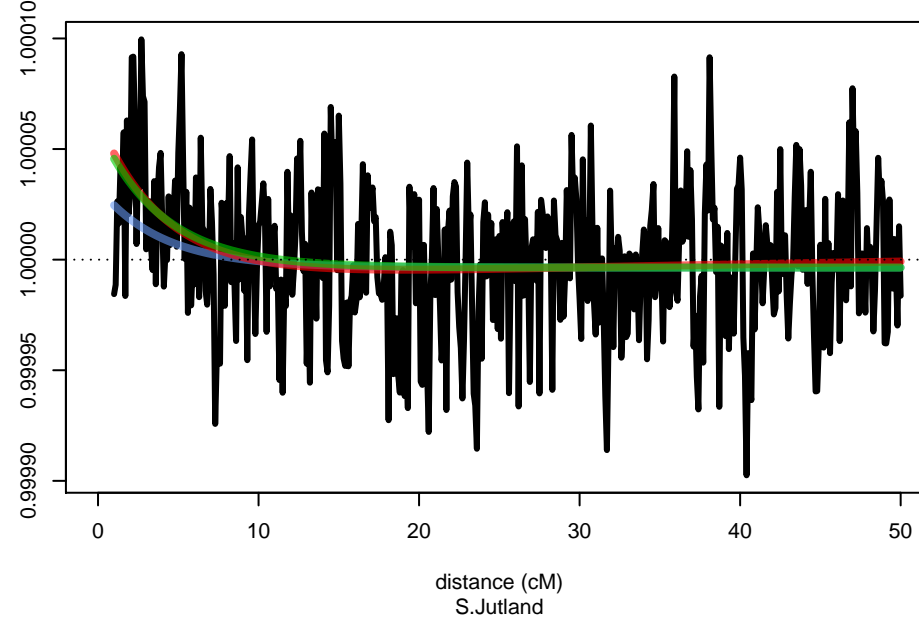**ger vs fra**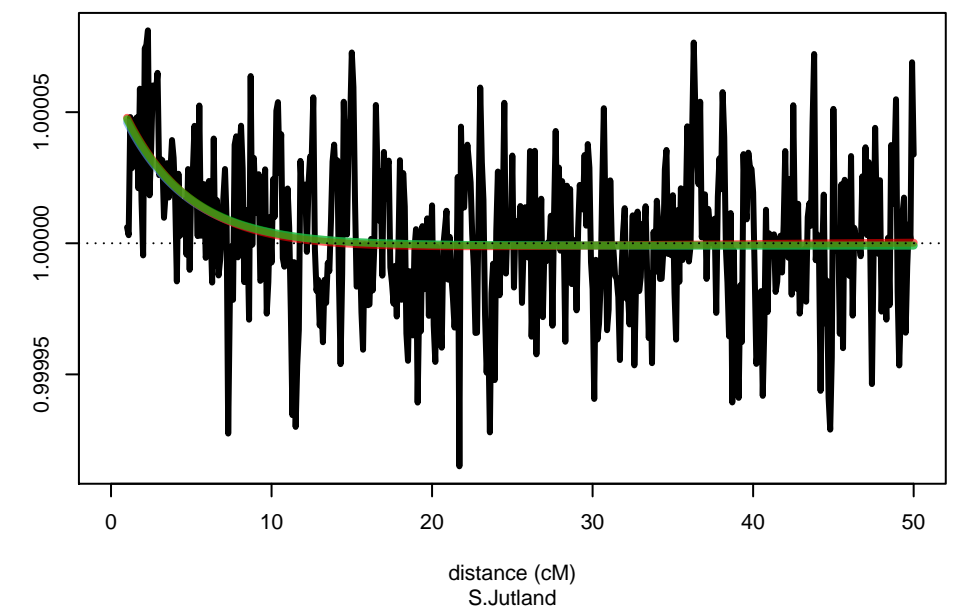

**bri vs nor**

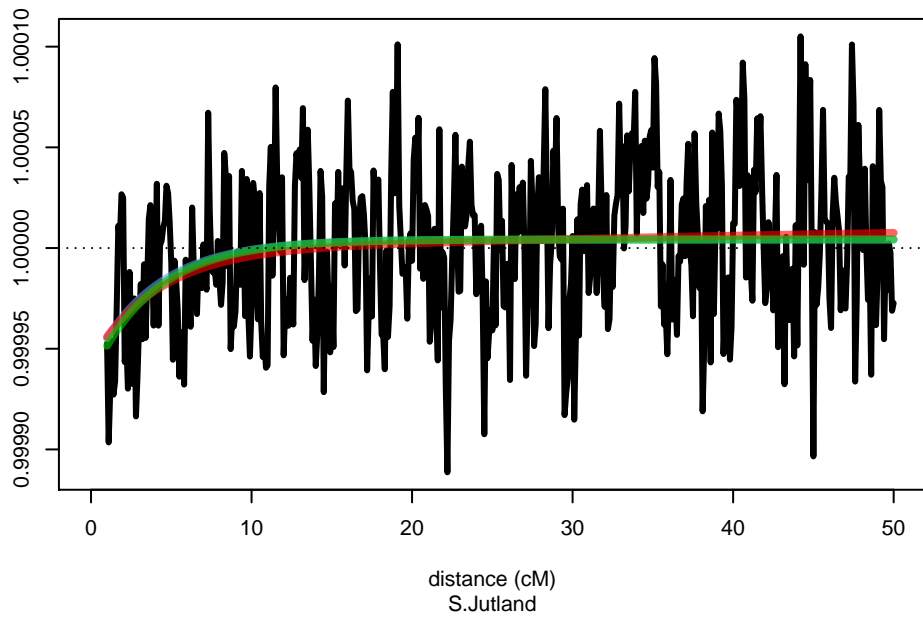

**bri vs swe**

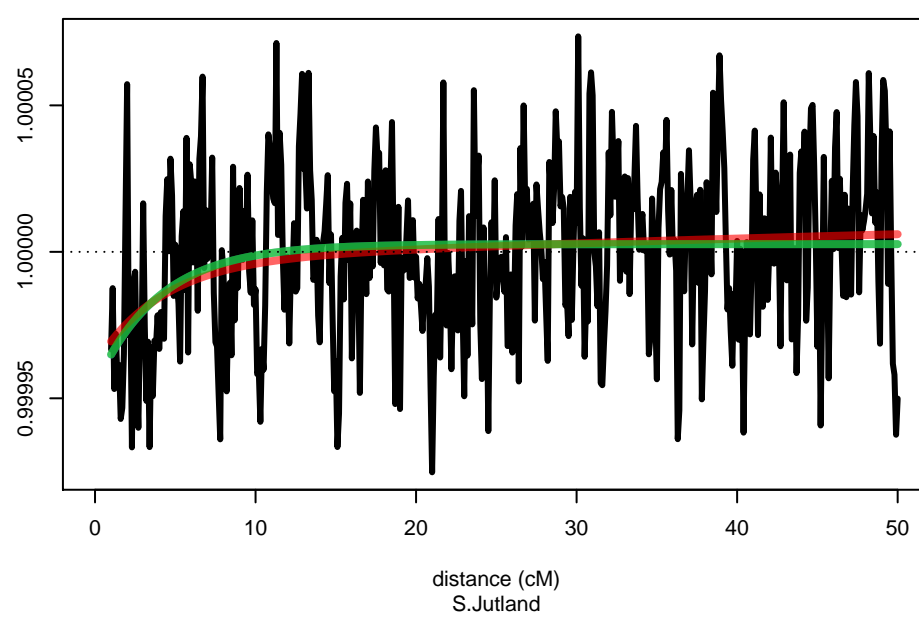

**bri vs ger**

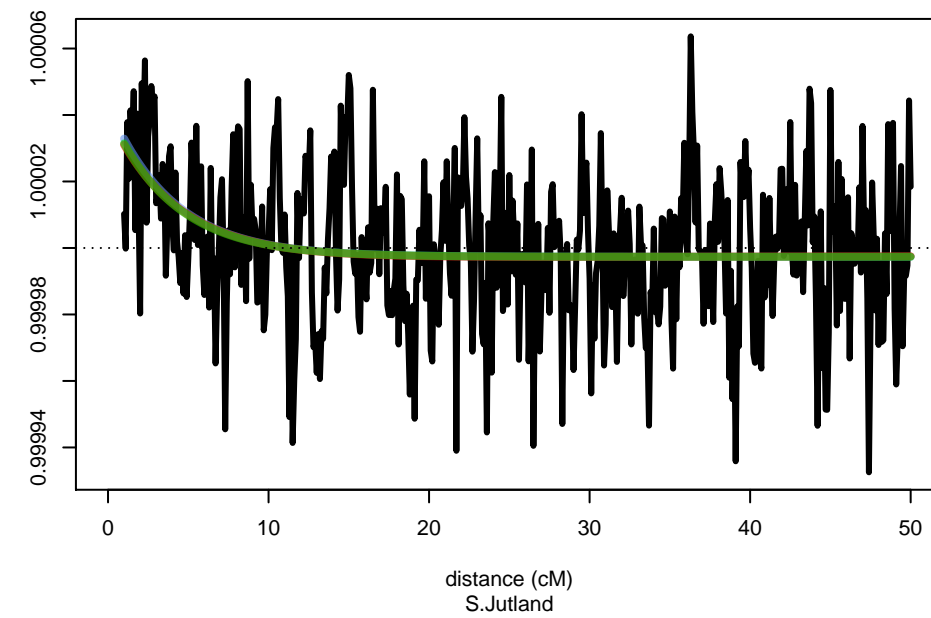

**bri vs bri**

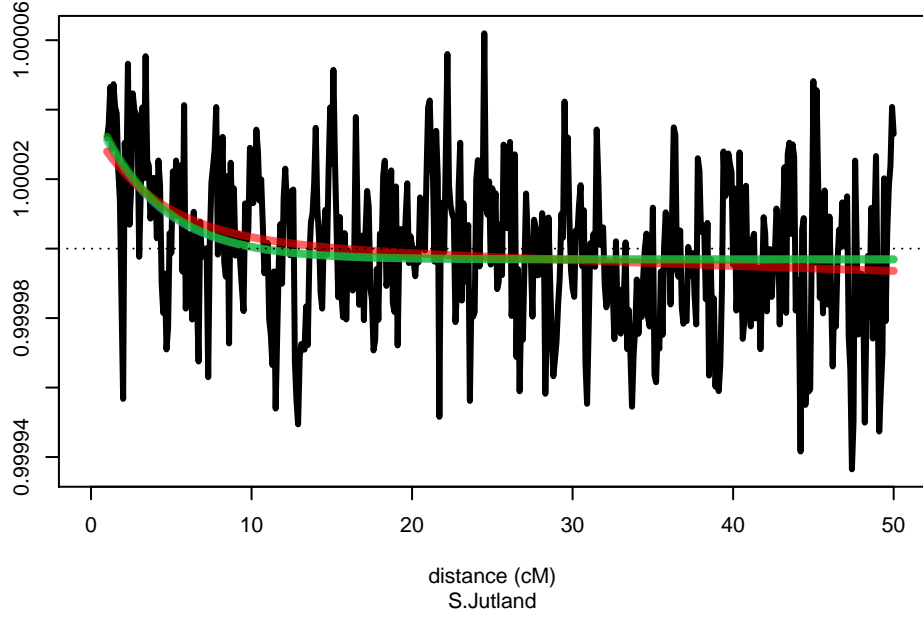

**bri vs pol**

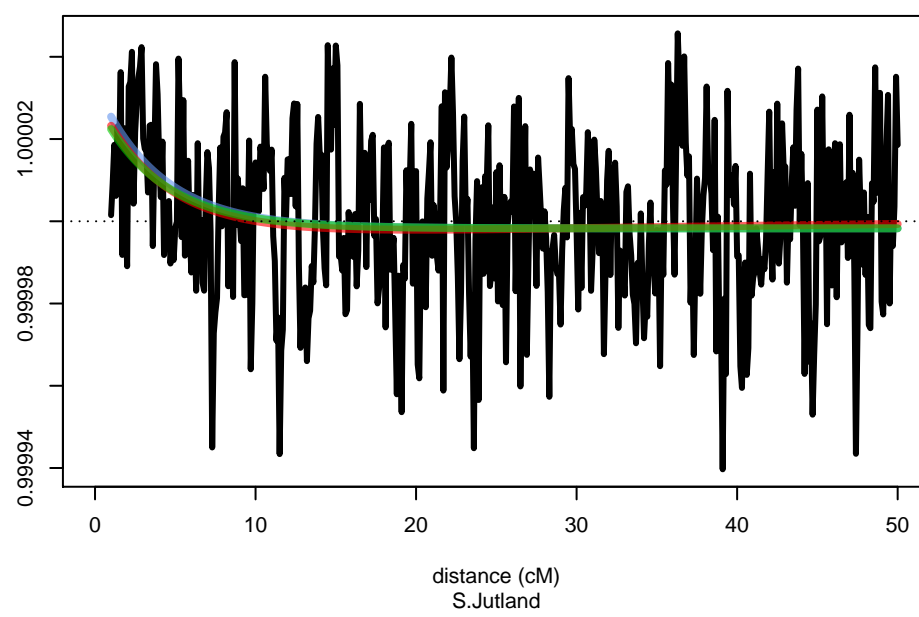

**bri vs fra**

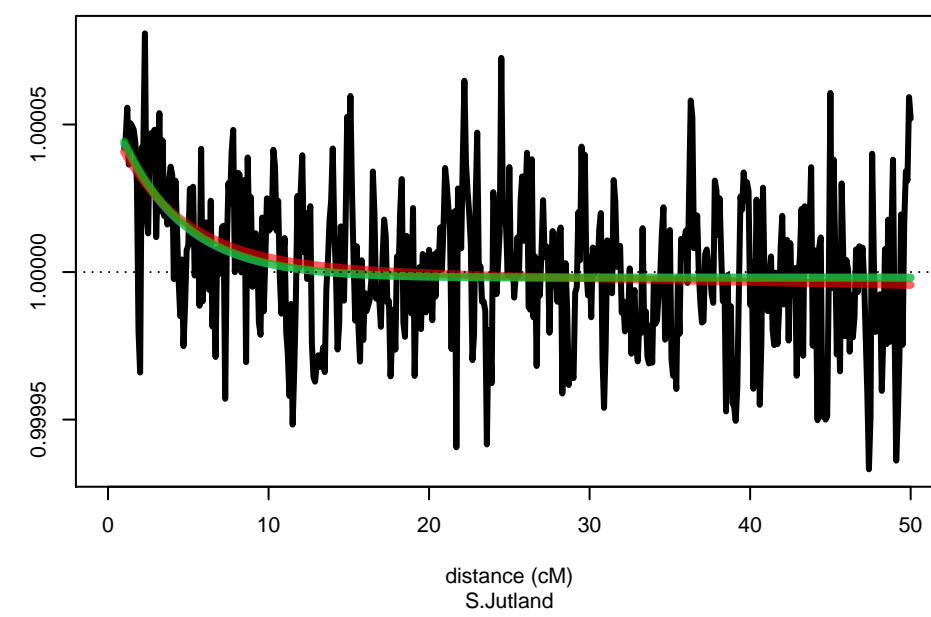

**pol vs nor**

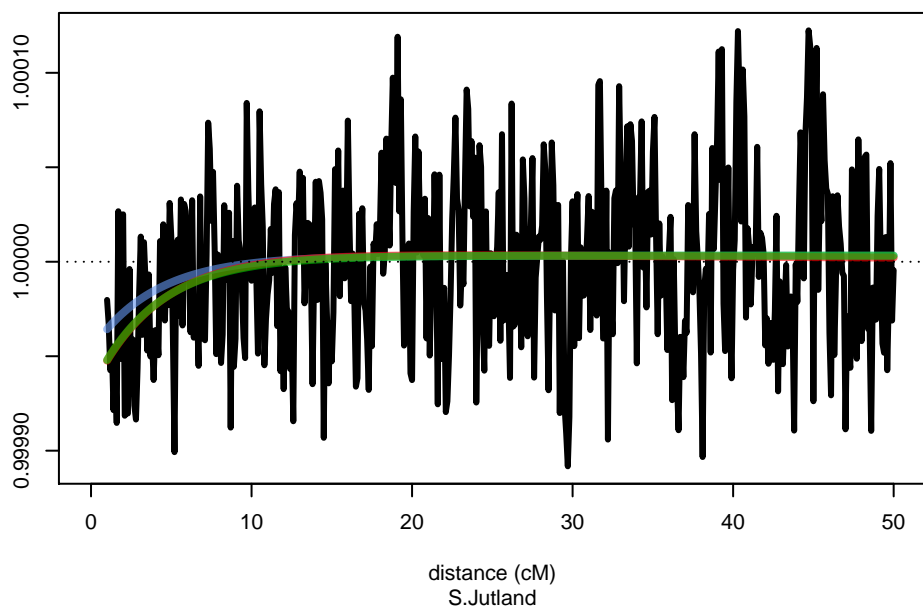

**pol vs swe**

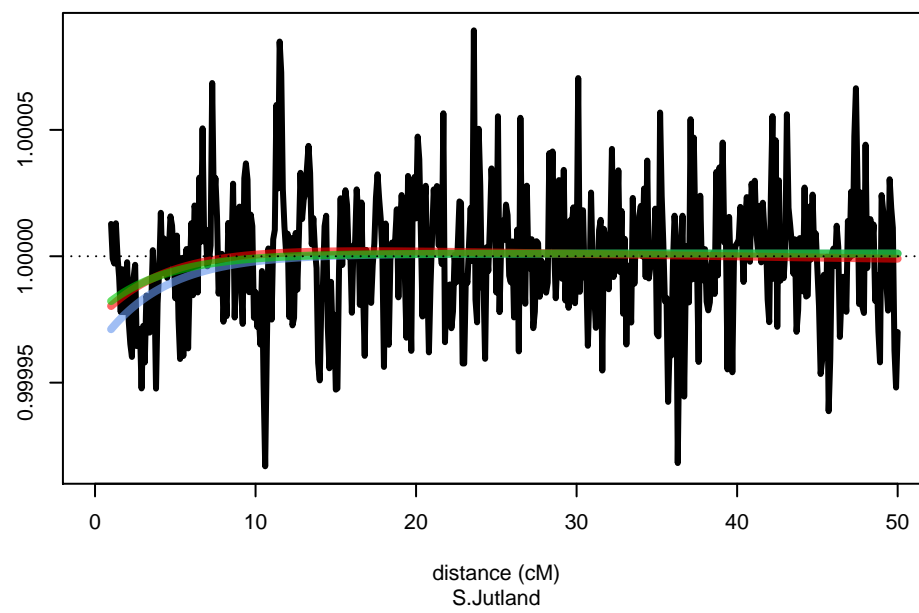

**pol vs ger**

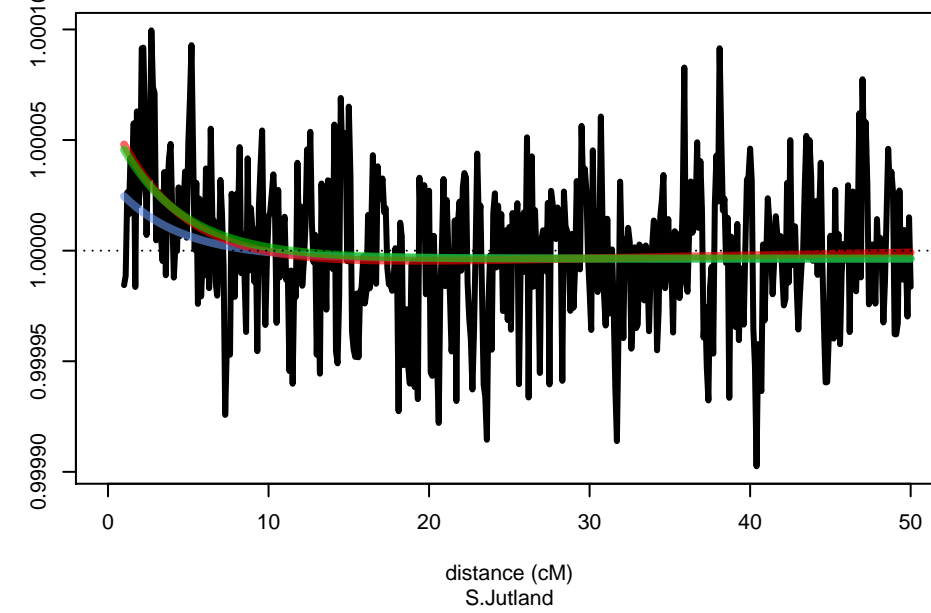

pol vs bri

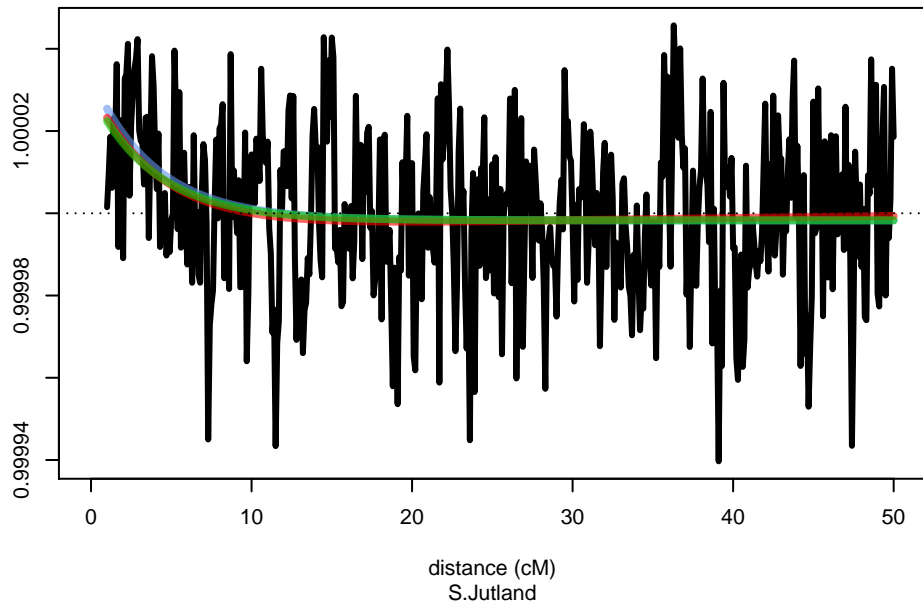

pol vs pol

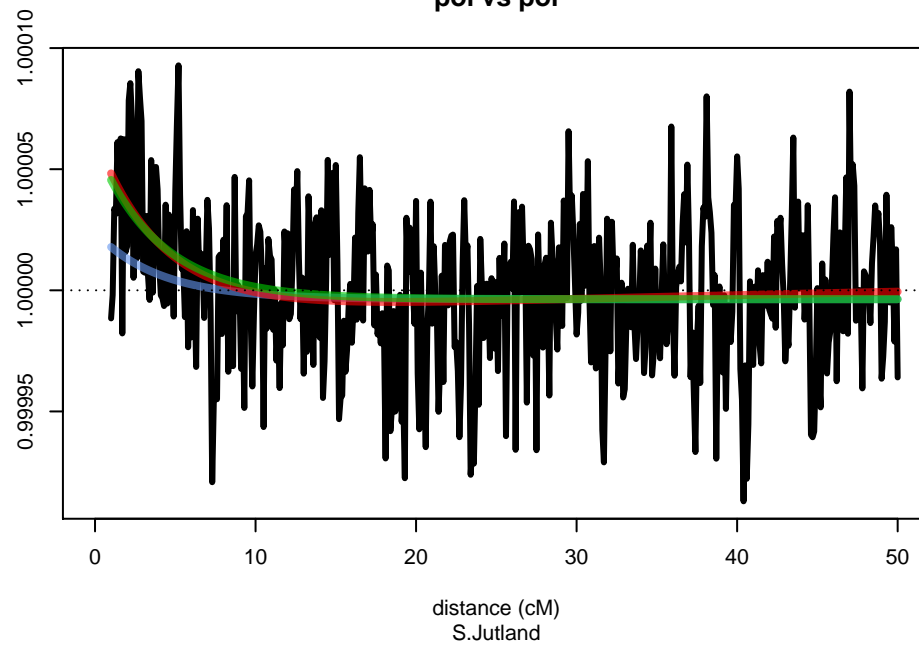

pol vs fra

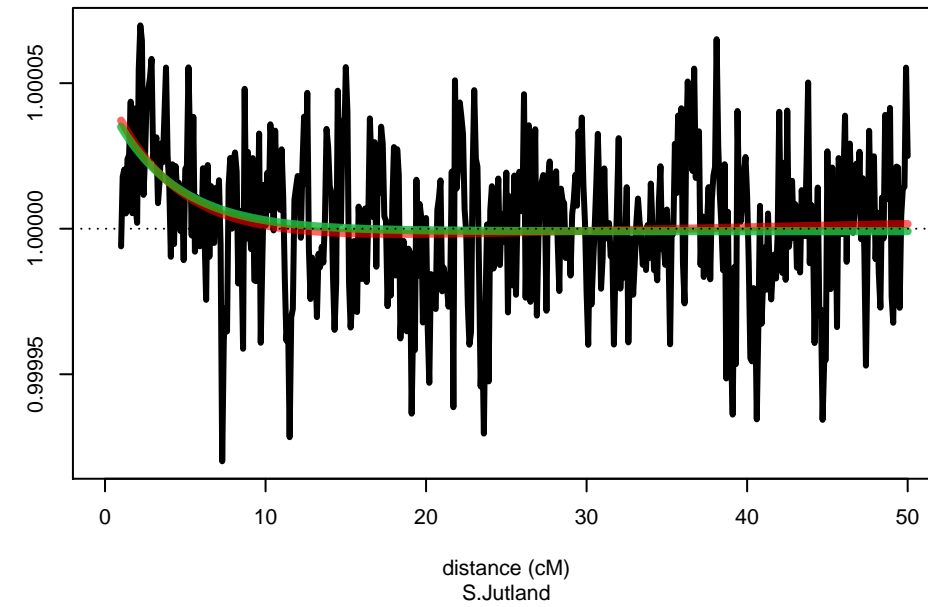

fra vs nor

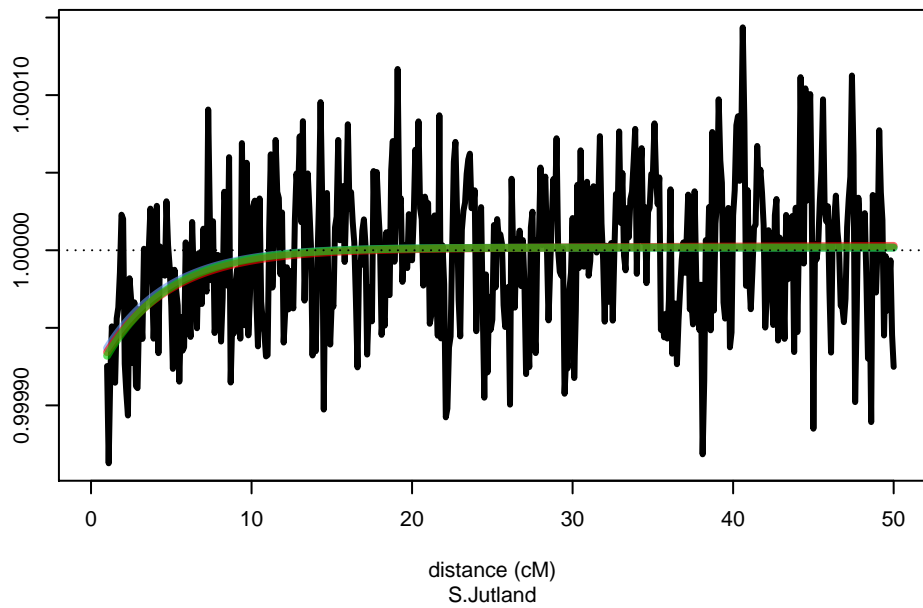

fra vs swe

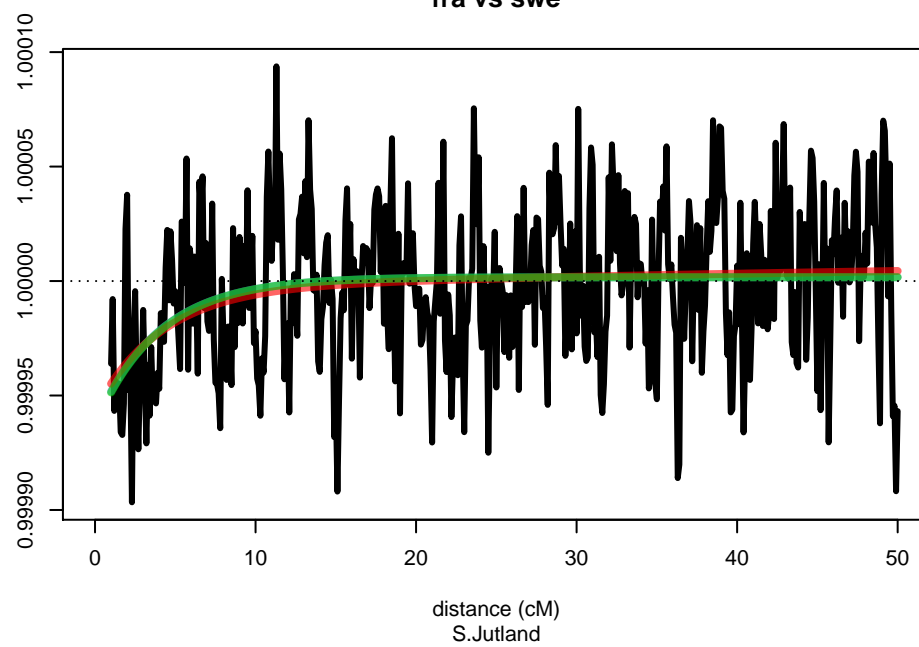

fra vs ger

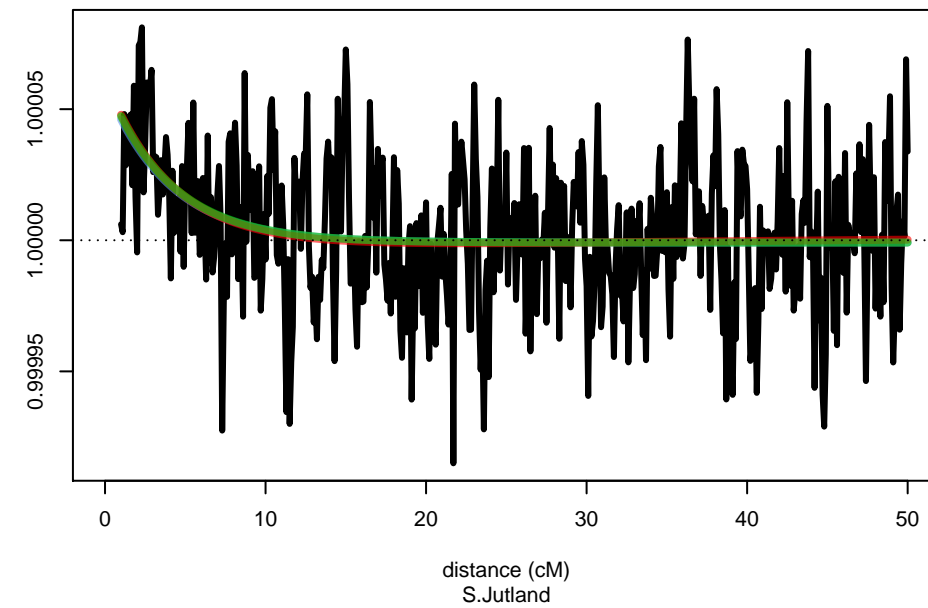

fra vs bri

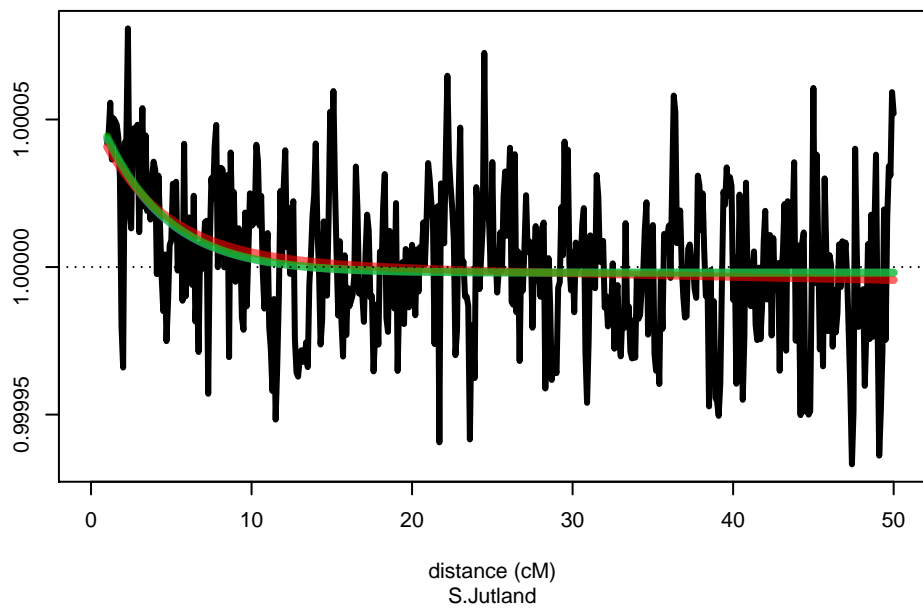

fra vs pol

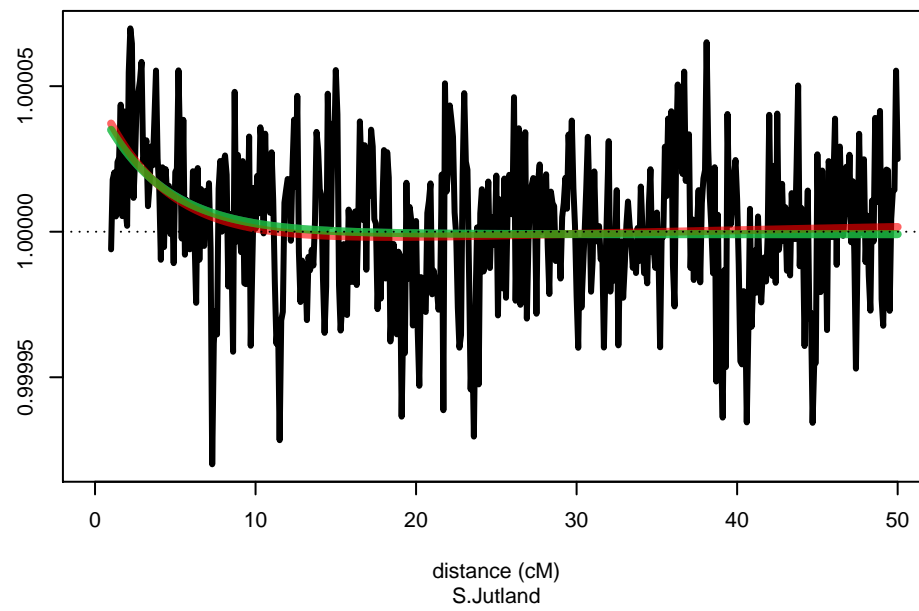

fra vs fra

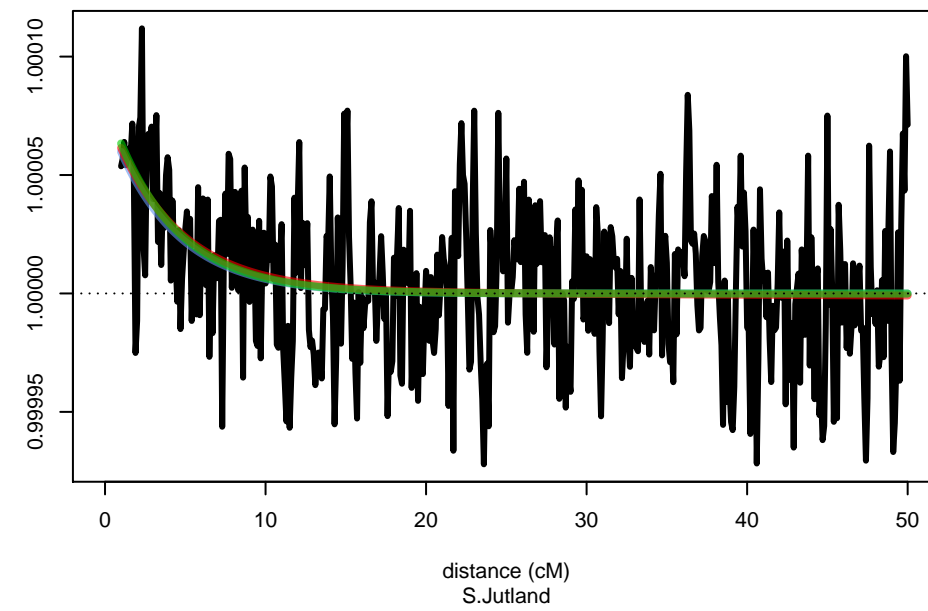

Supplement: figures2.pdf [file figures2.pdf]
