# Supplementary material for: Nationwide Genomic Study in Denmark Reveals Remarkable Population Homogeneity
Source: Oxford University Press journal article supplement (doi:10.1534/genetics.116.189241), 2016-08-18
Supplement: figures3.pdf [file figures3.pdf]

**nor vs nor**

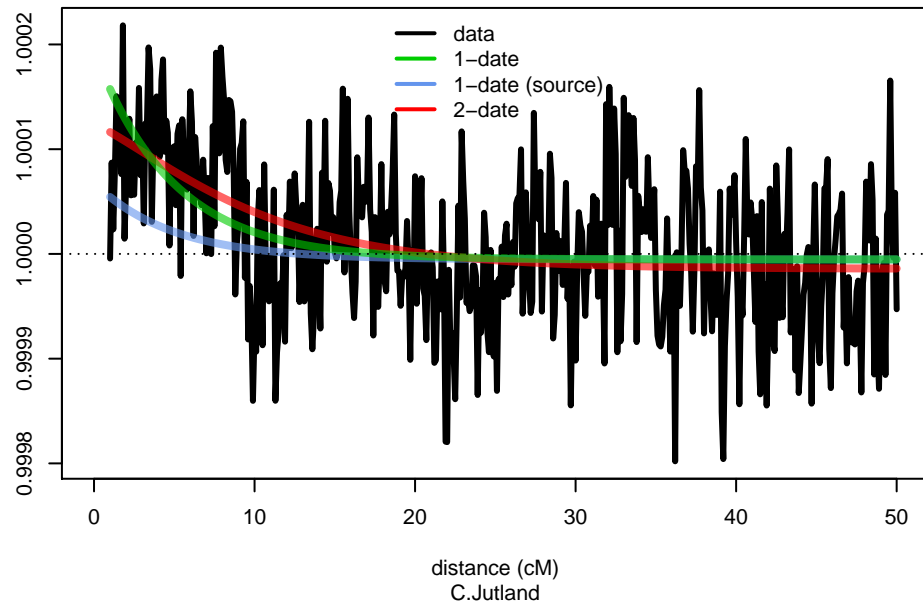

**nor vs swe**

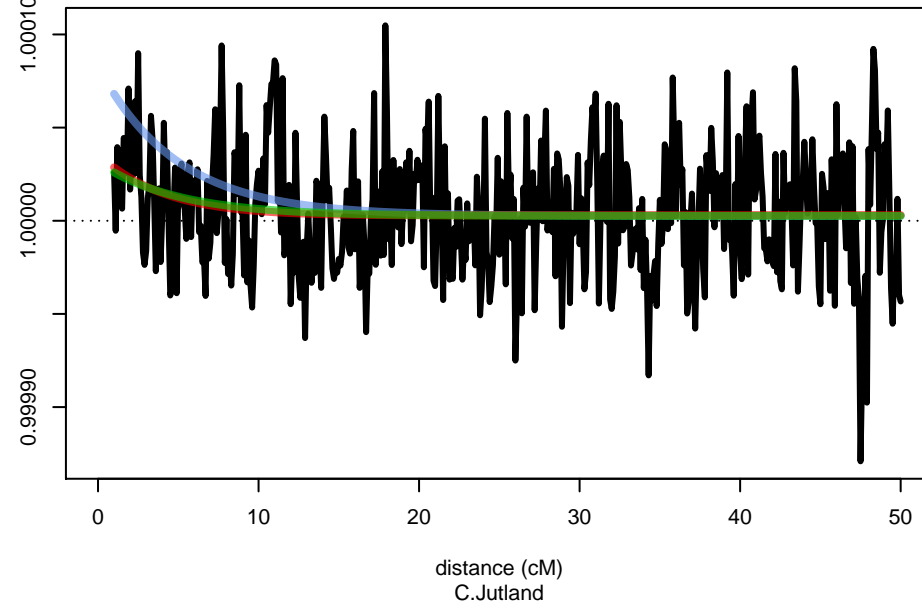

**nor vs ger**

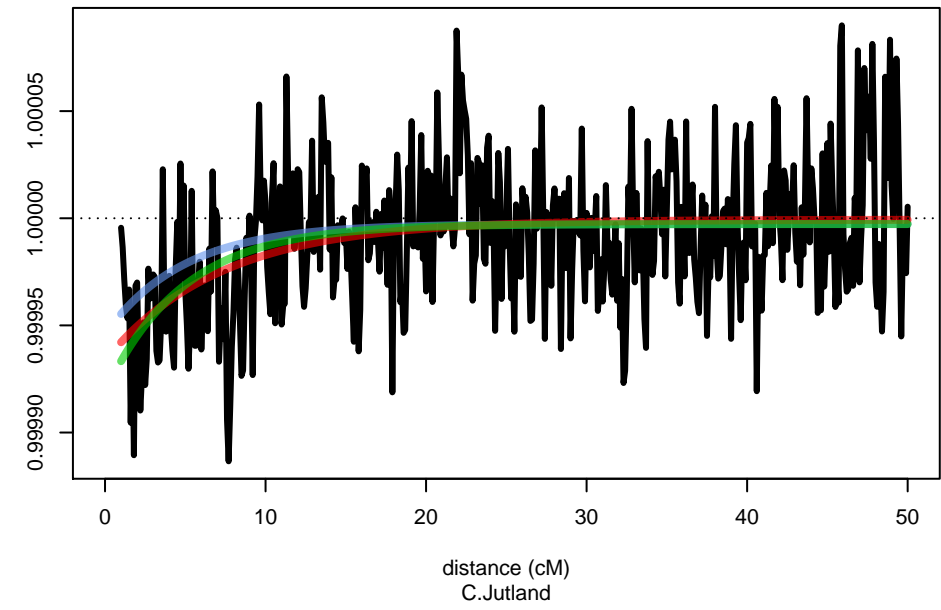

**nor vs bri**

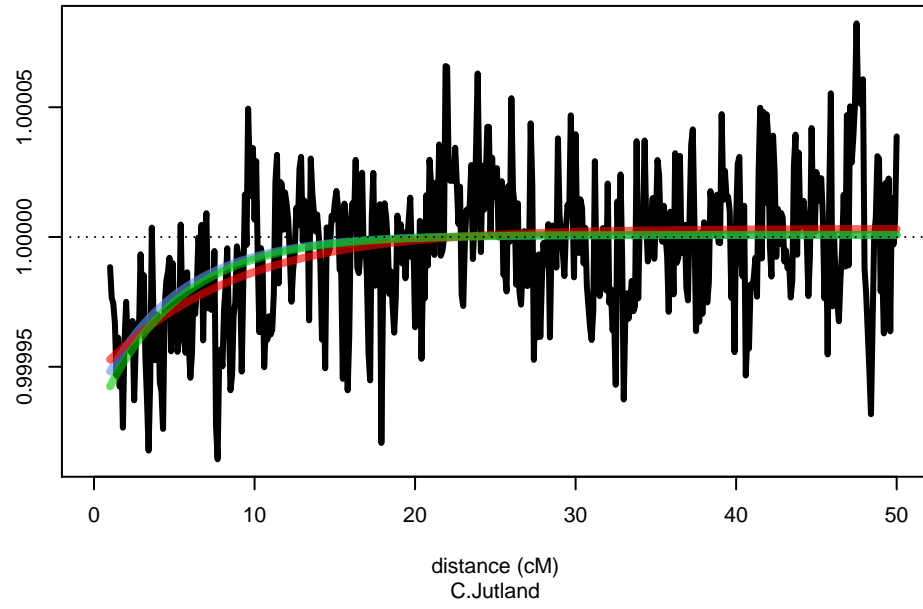

**nor vs fra**

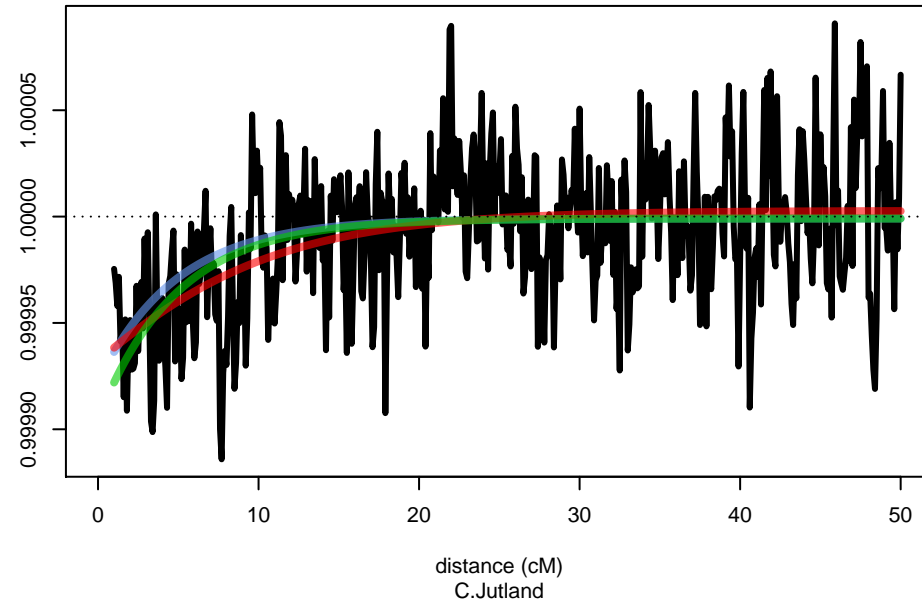

**nor vs fin**

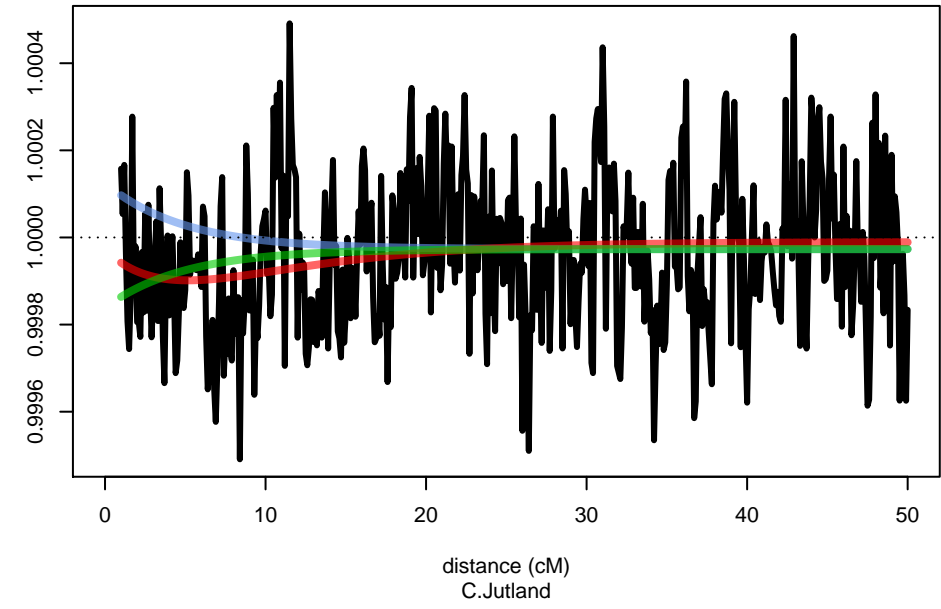

**swe vs nor**

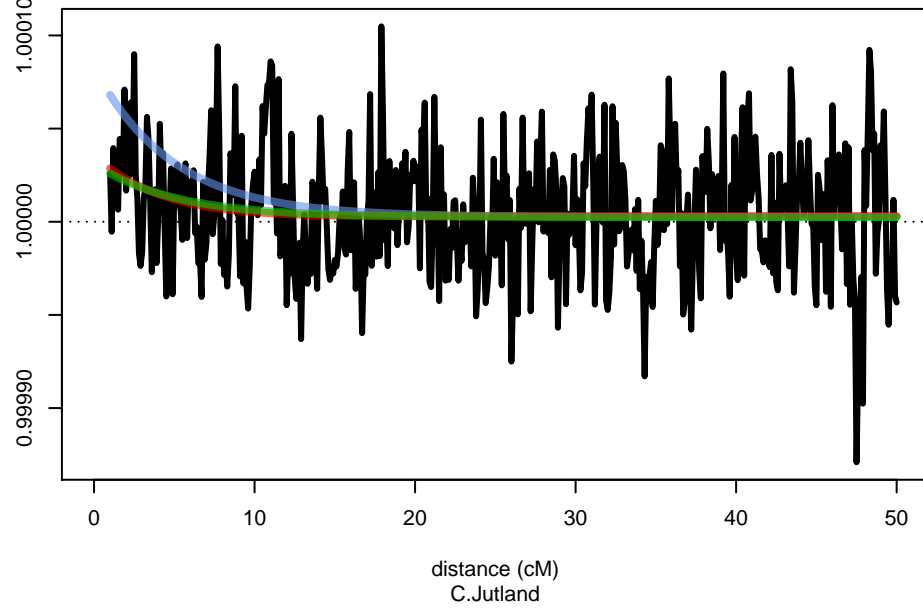

**swe vs swe**

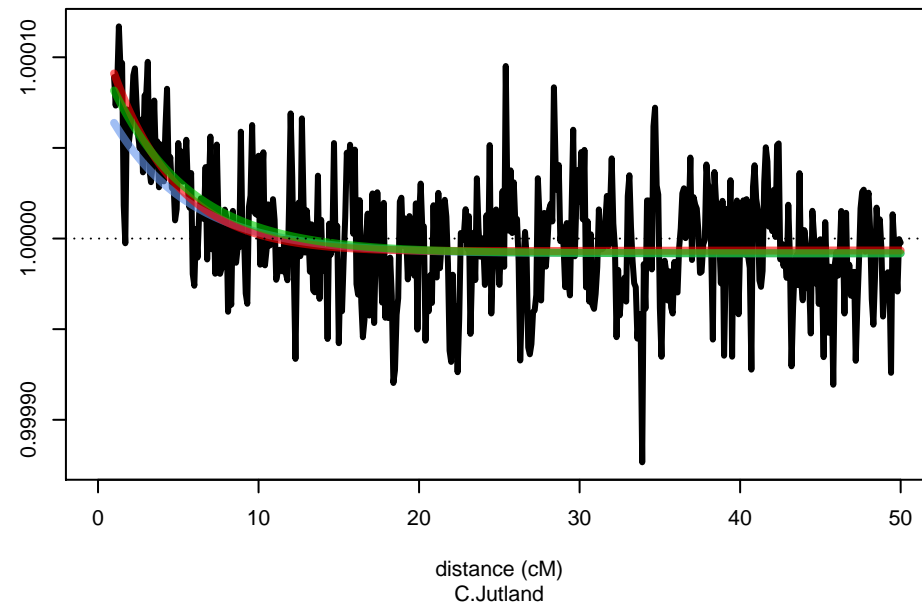

**swe vs ger**

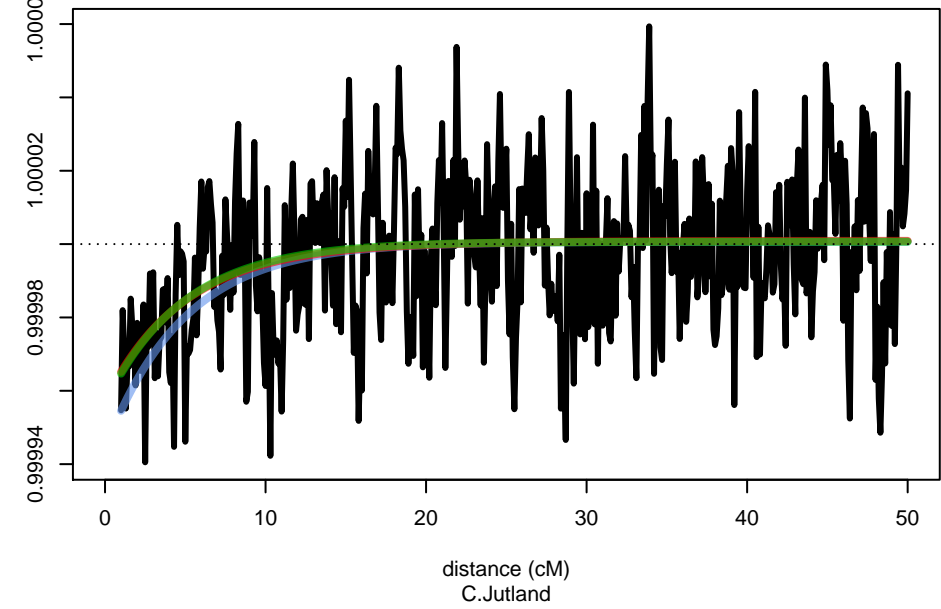

**swe vs bri**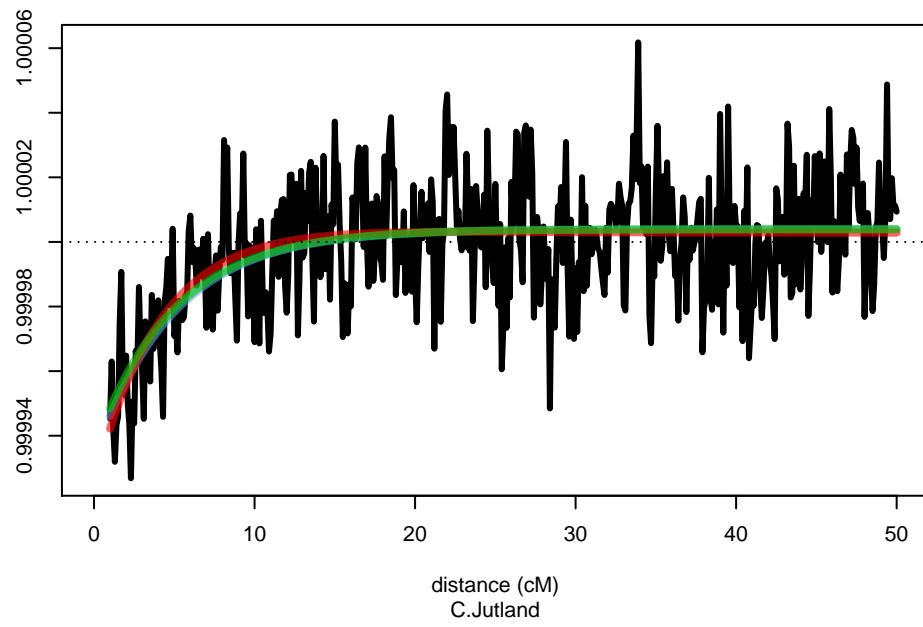**swe vs fra**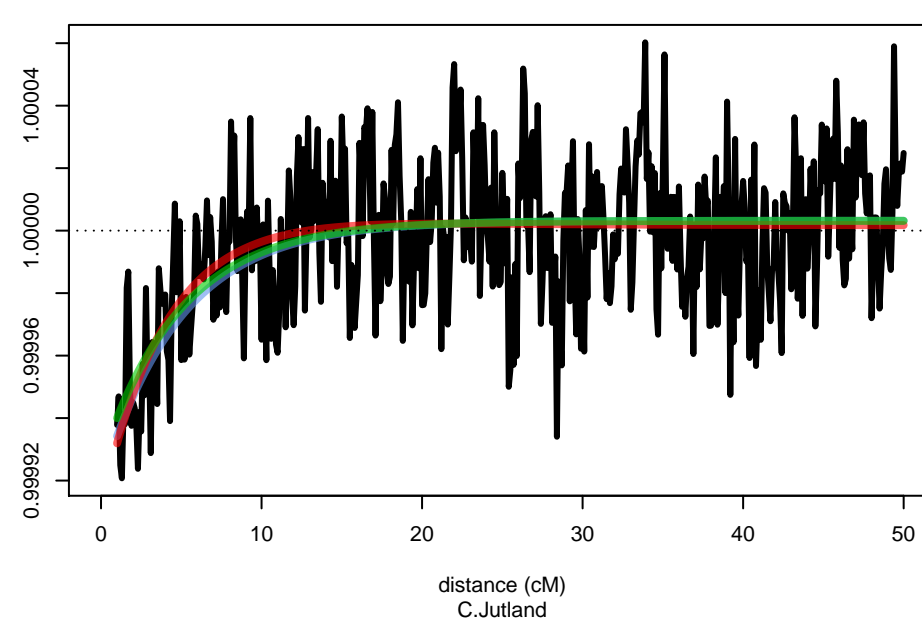**swe vs fin**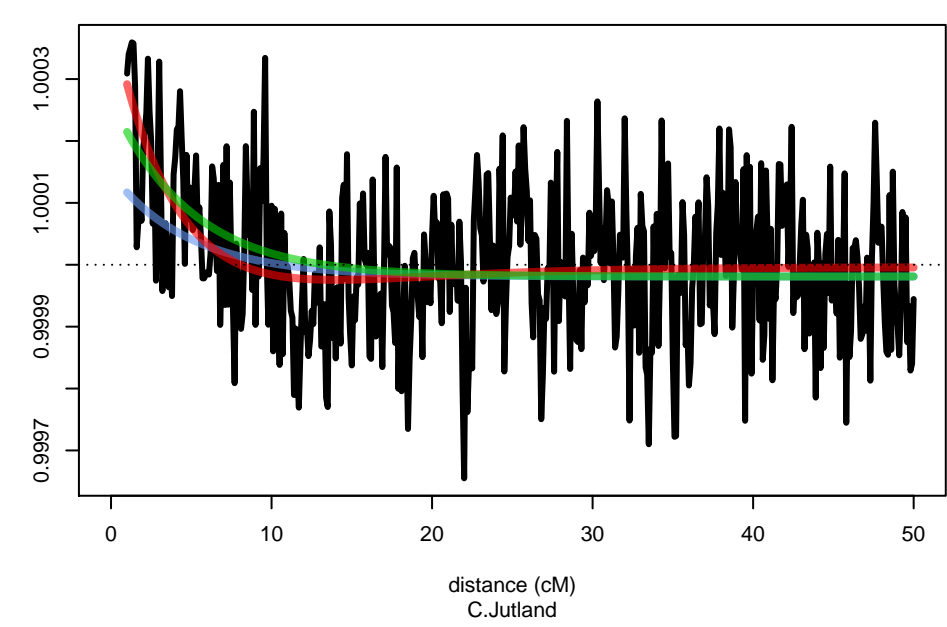**ger vs nor**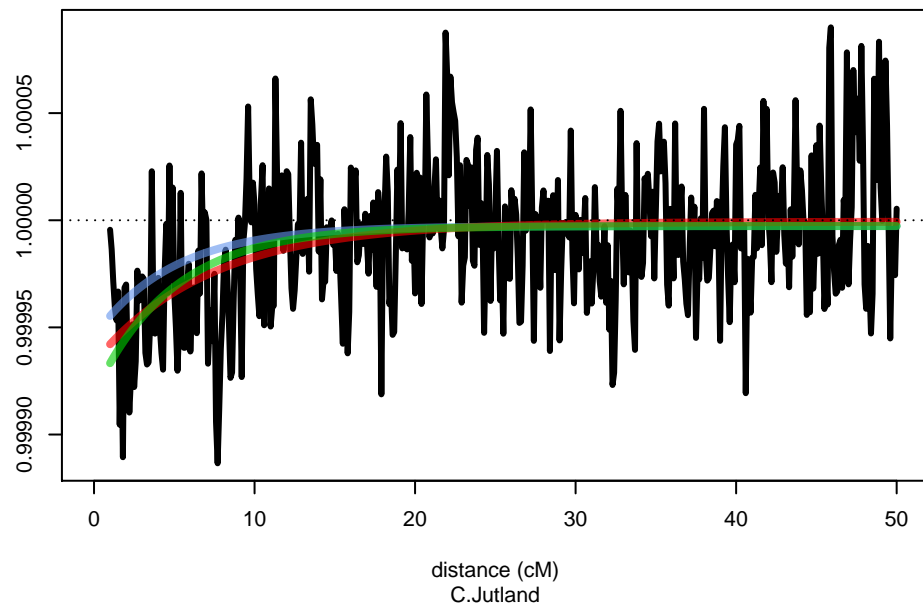**ger vs swe**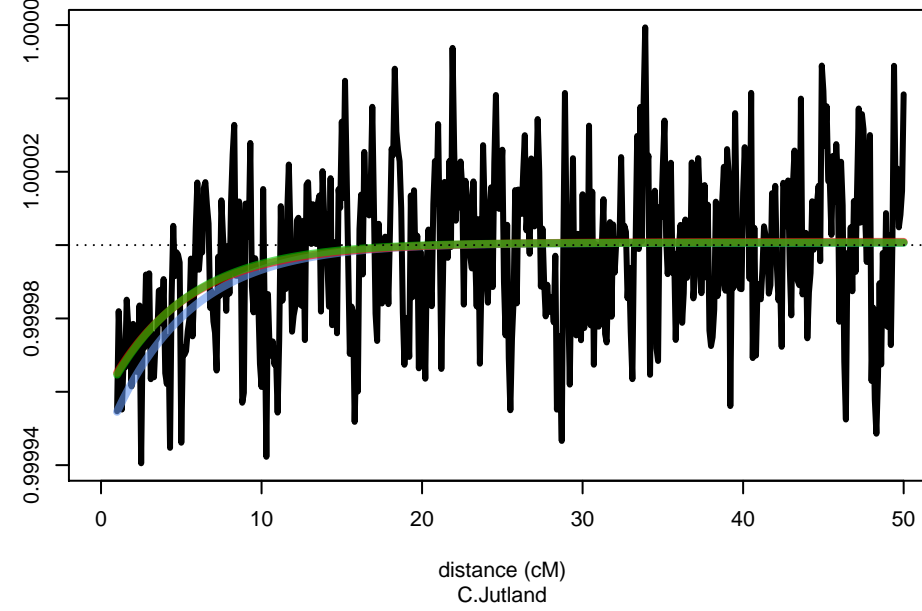**ger vs ger**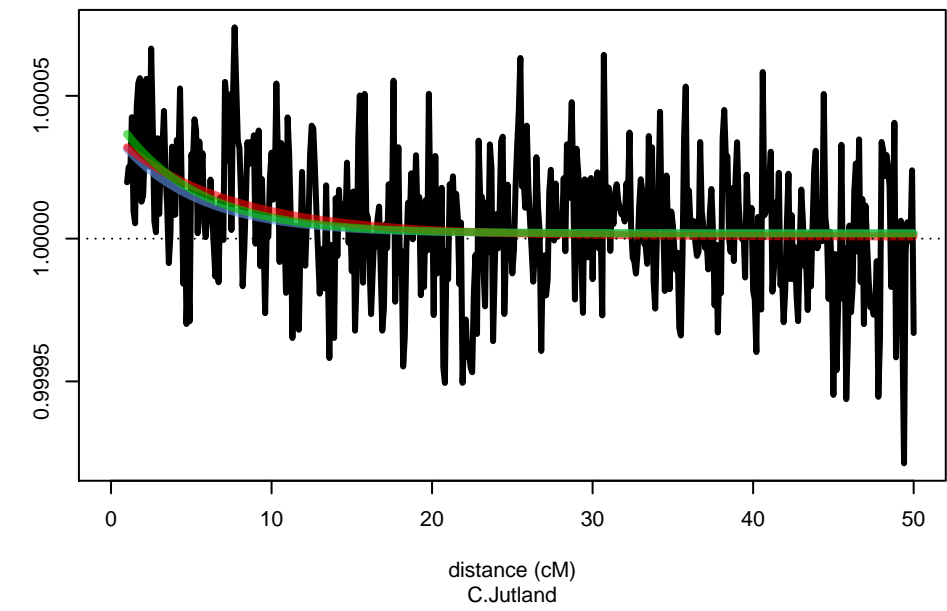**ger vs bri**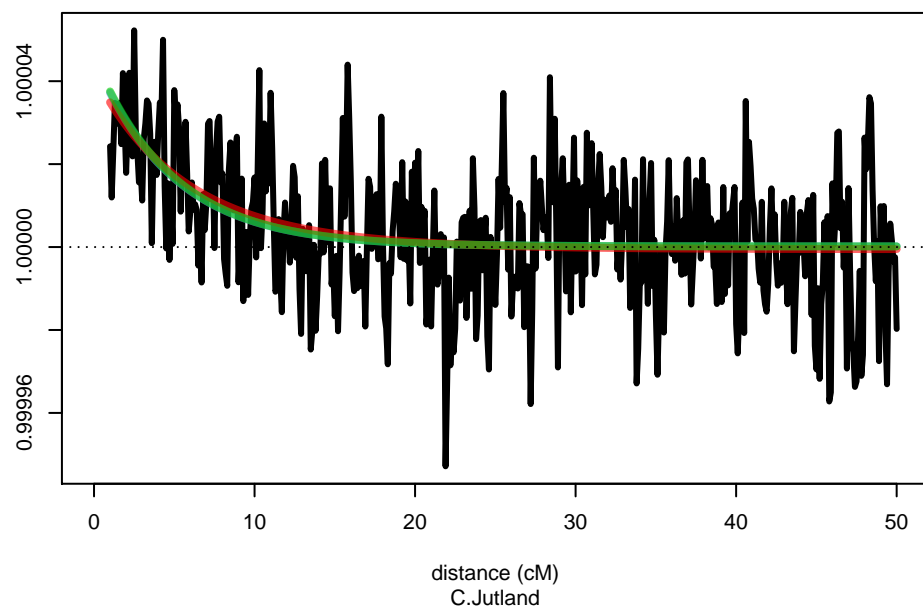**ger vs fra**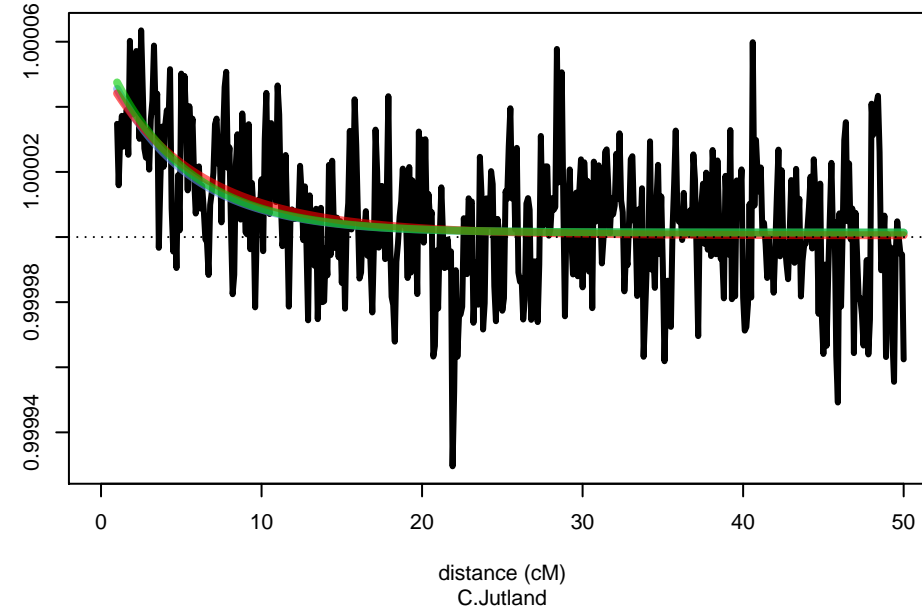**ger vs fin**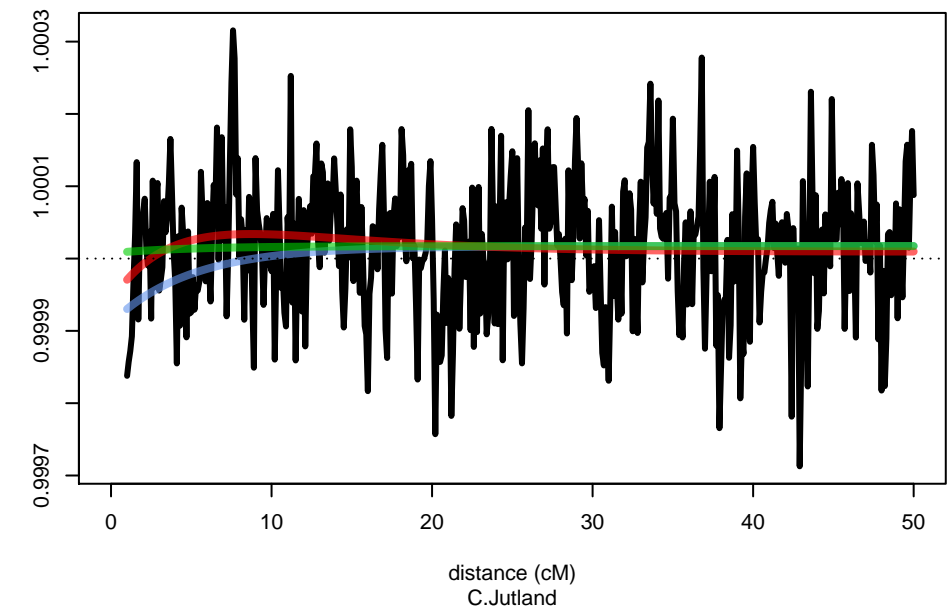

**bri vs nor**

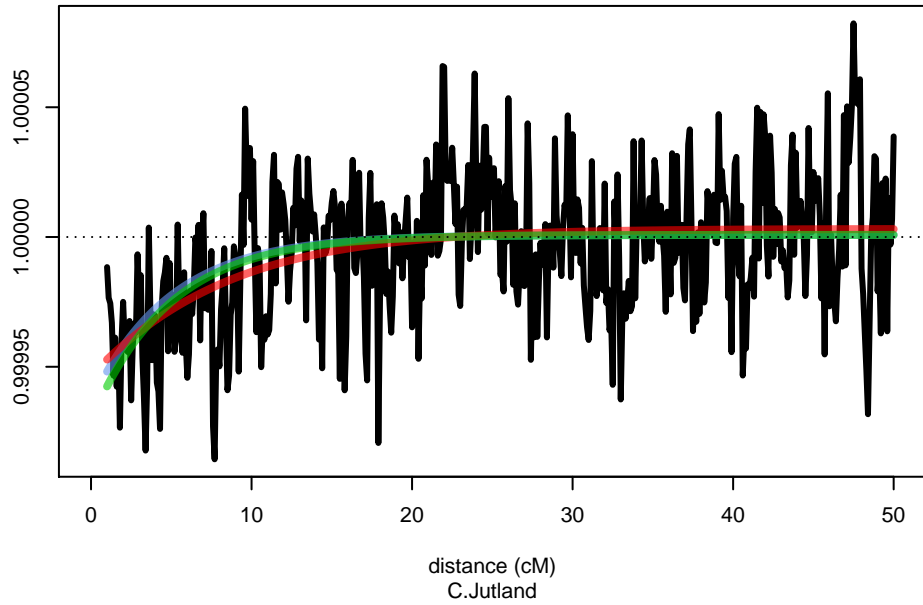

**bri vs swe**

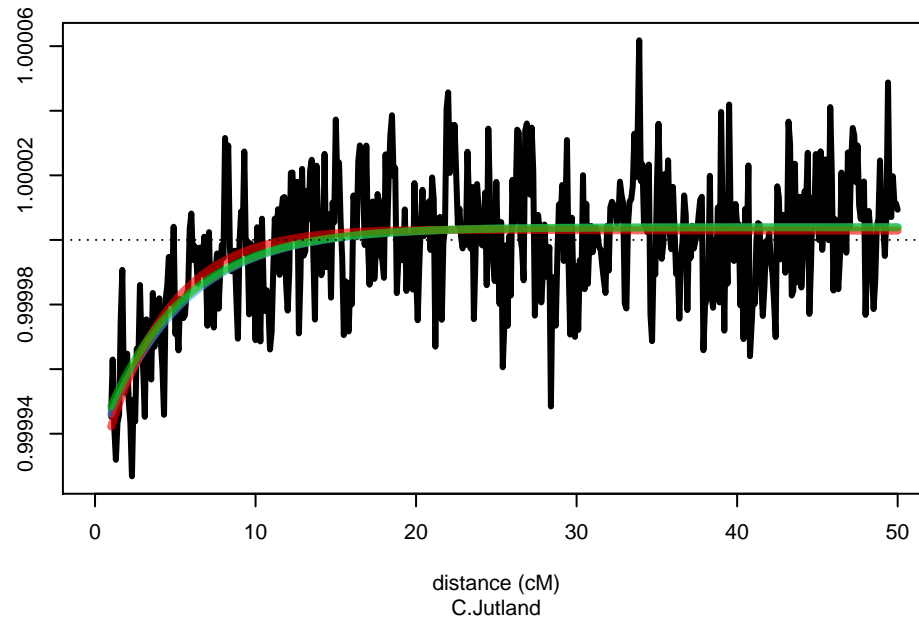

**bri vs ger**

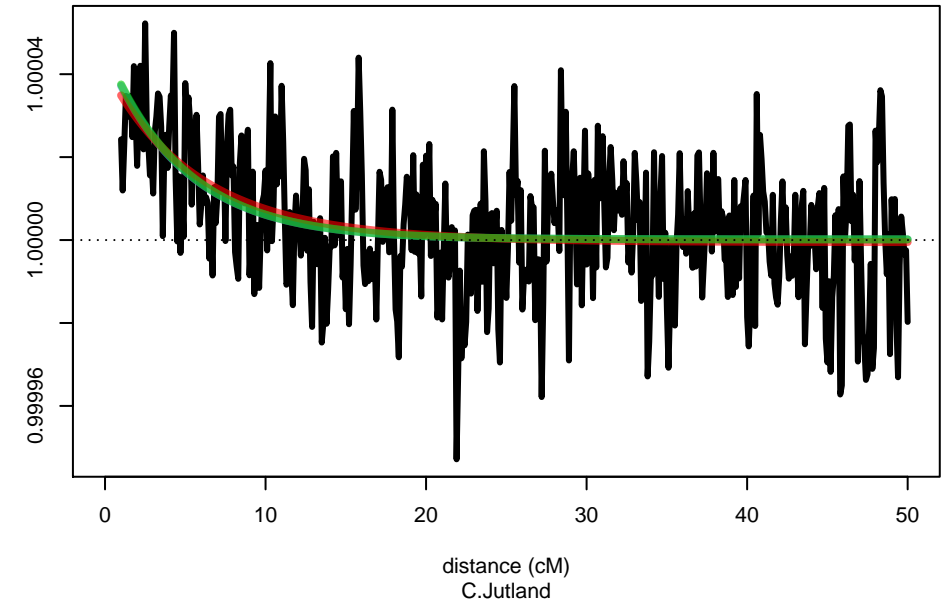

**bri vs bri**

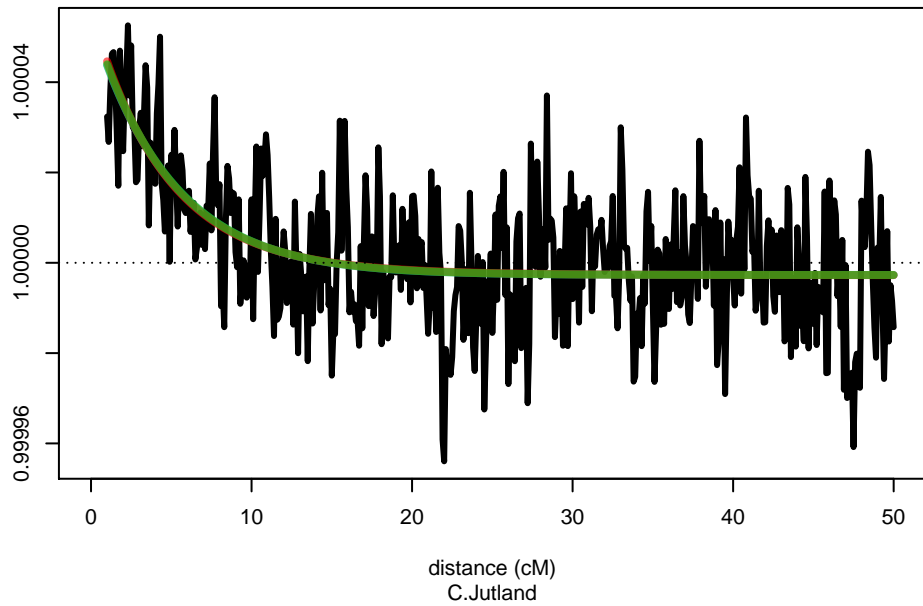

**bri vs fra**

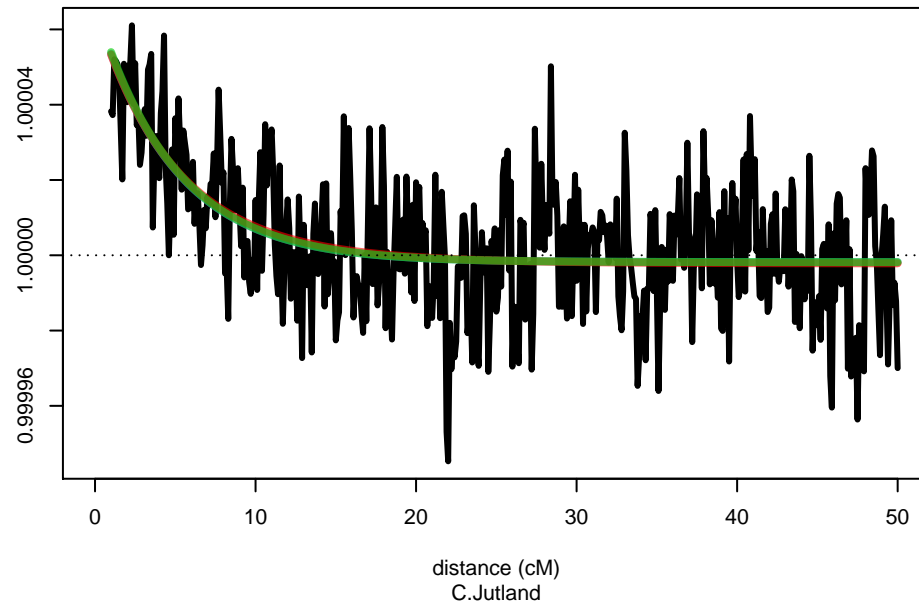

**bri vs fin**

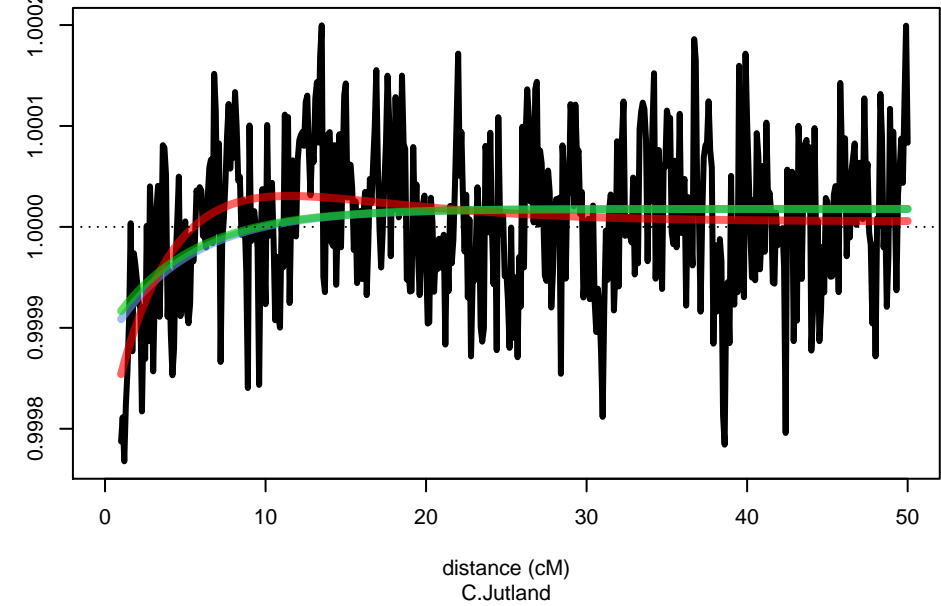

**fra vs nor**

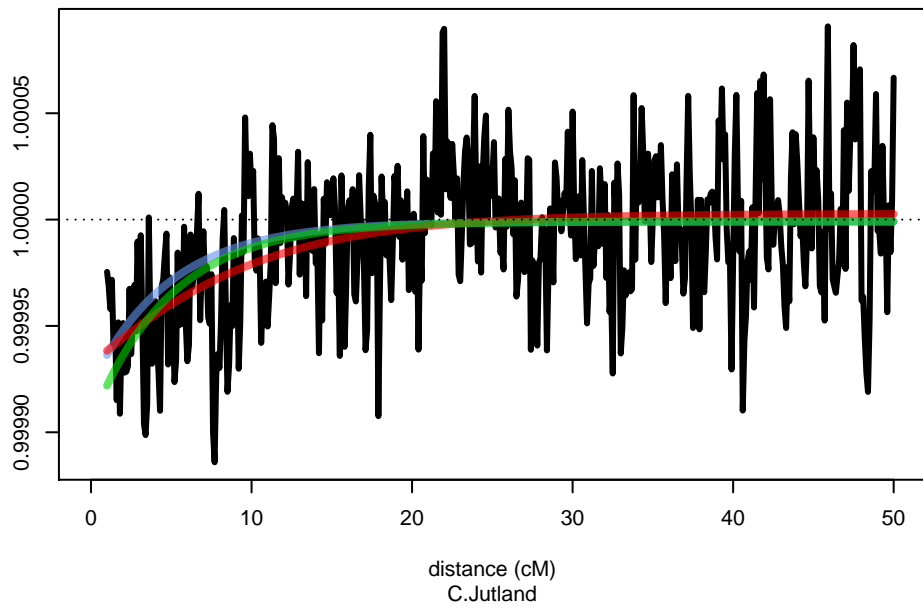

**fra vs swe**

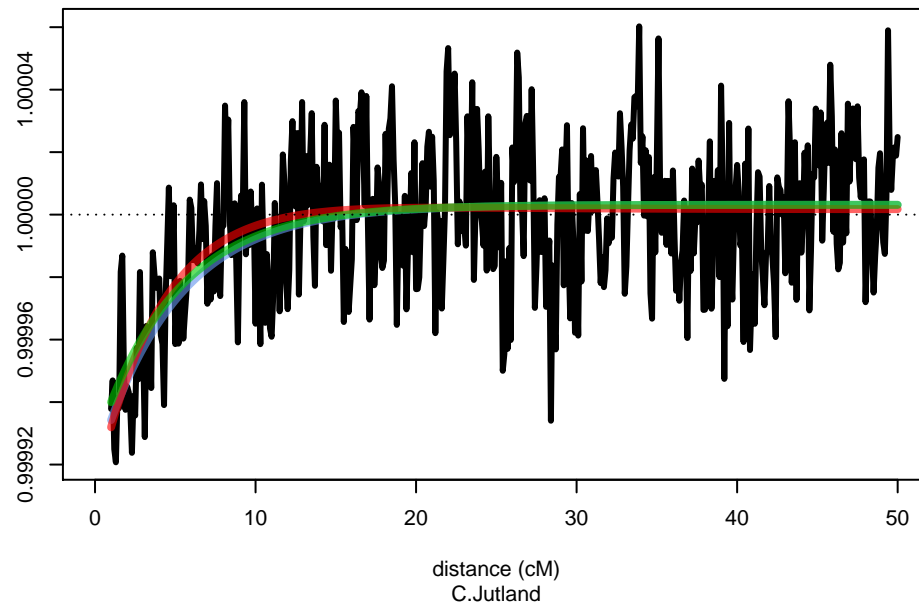

**fra vs ger**

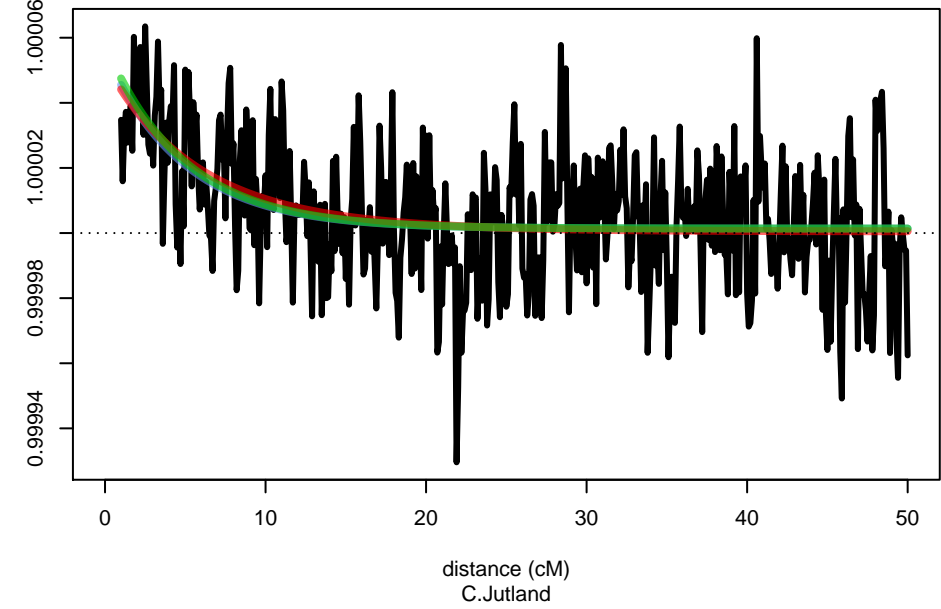

**fra vs bri**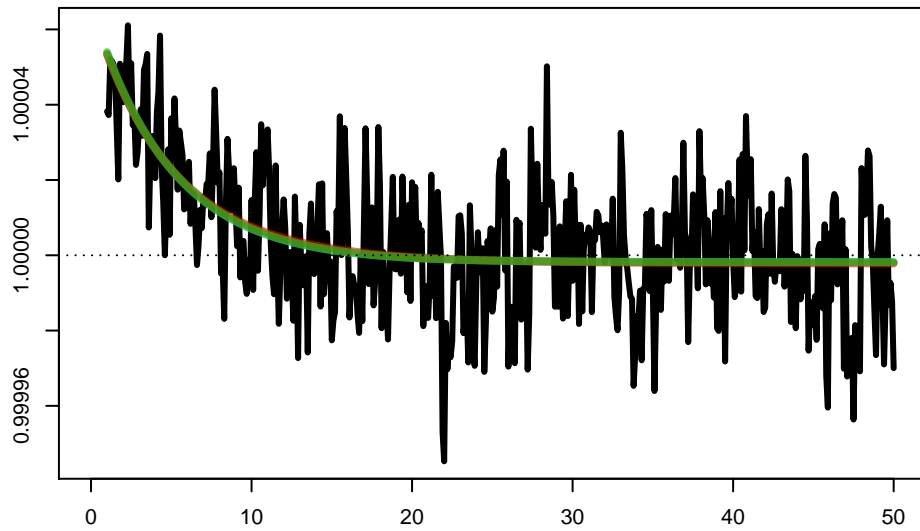

distance (cM)  
C.Jutland

**fra vs fra**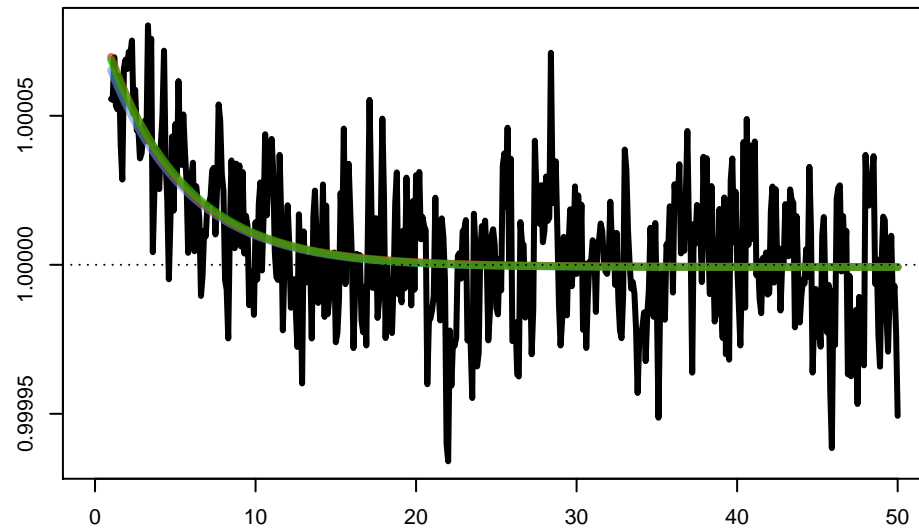

distance (cM)  
C.Jutland

**fra vs fin**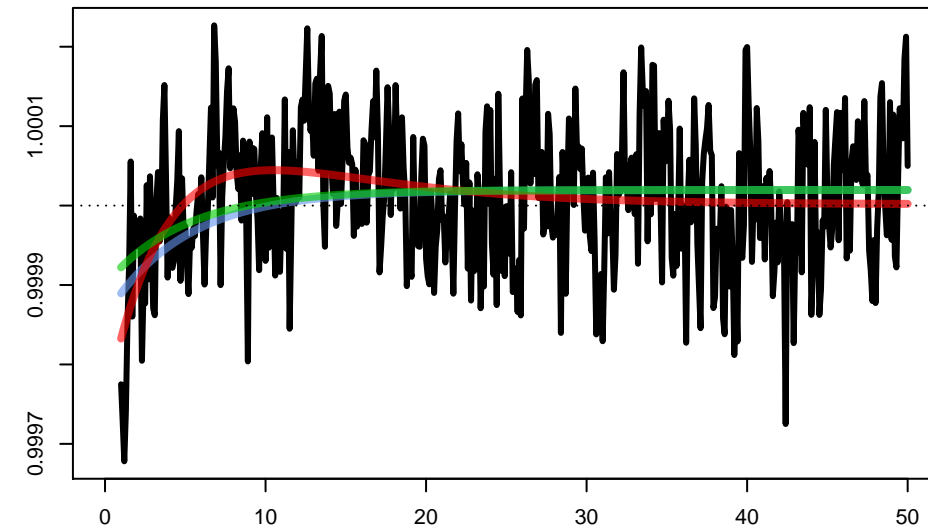

distance (cM)  
C.Jutland

**fin vs nor**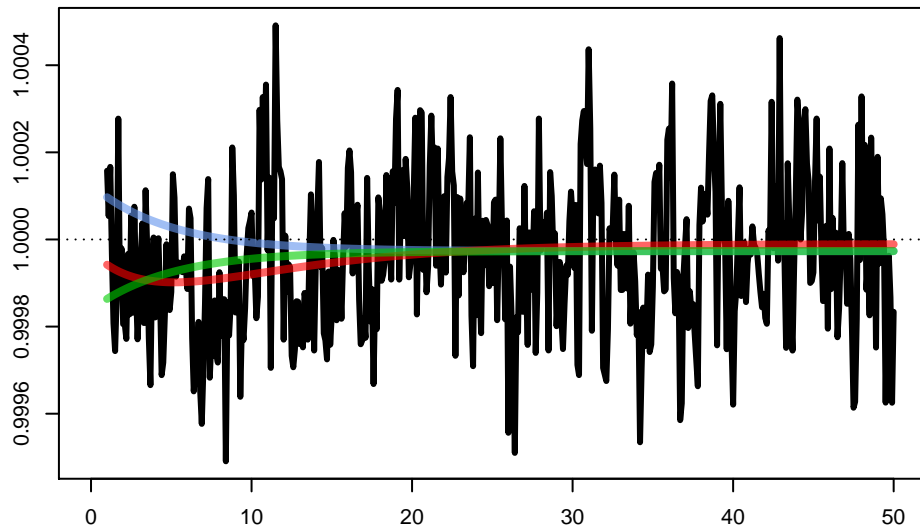

distance (cM)  
C.Jutland

**fin vs swe**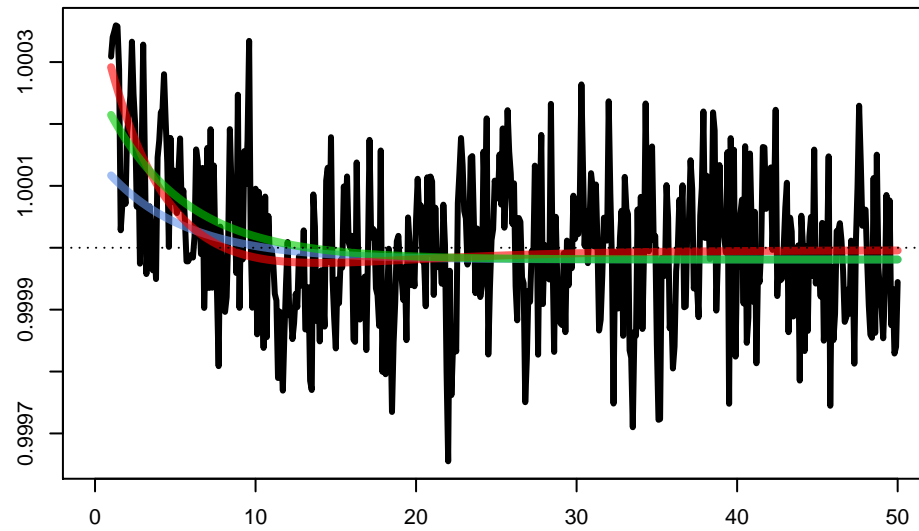

distance (cM)  
C.Jutland

**fin vs ger**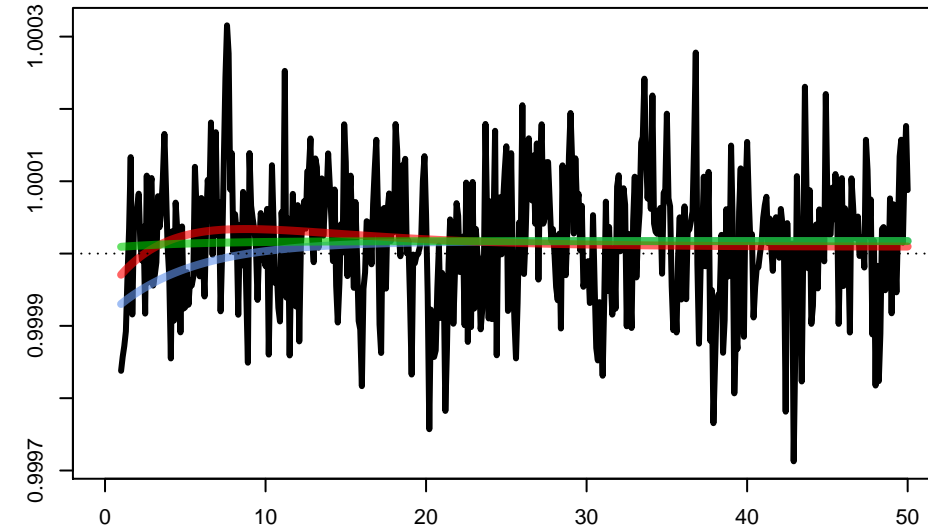

distance (cM)  
C.Jutland

**fin vs bri**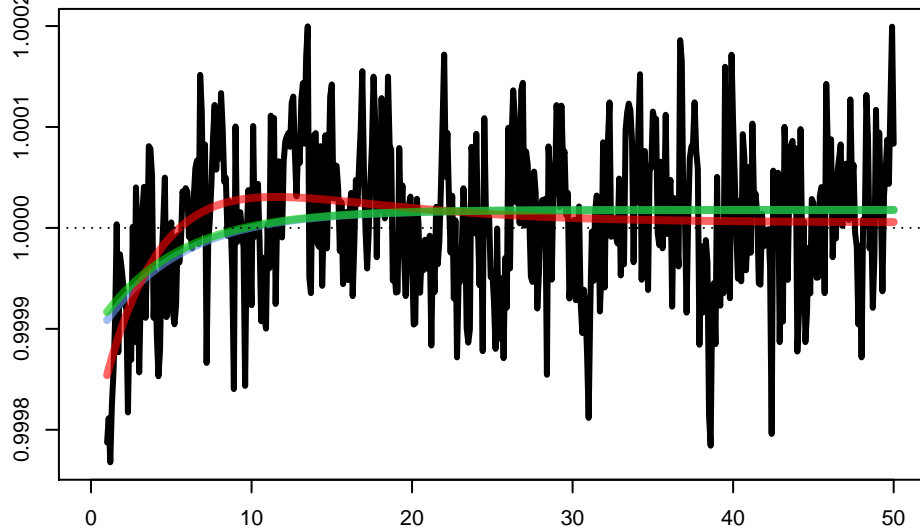

distance (cM)  
C.Jutland

**fin vs fra**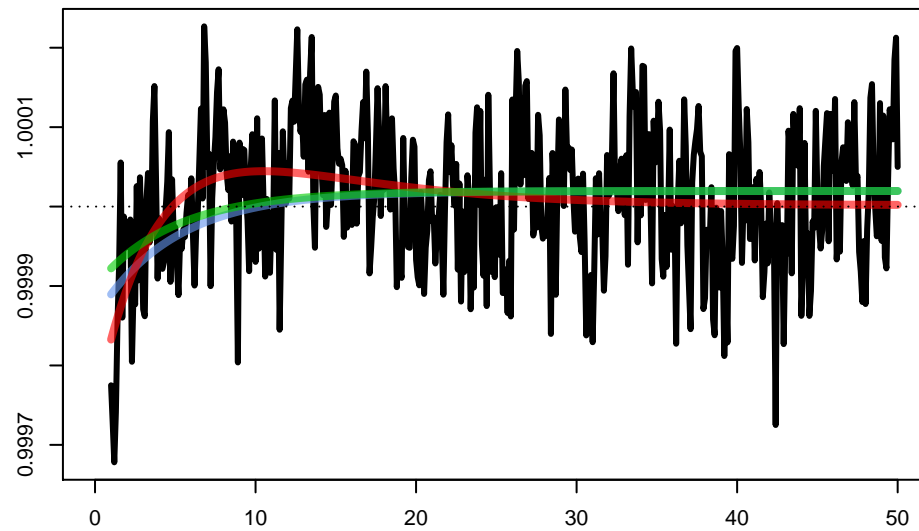

distance (cM)  
C.Jutland

**fin vs fin**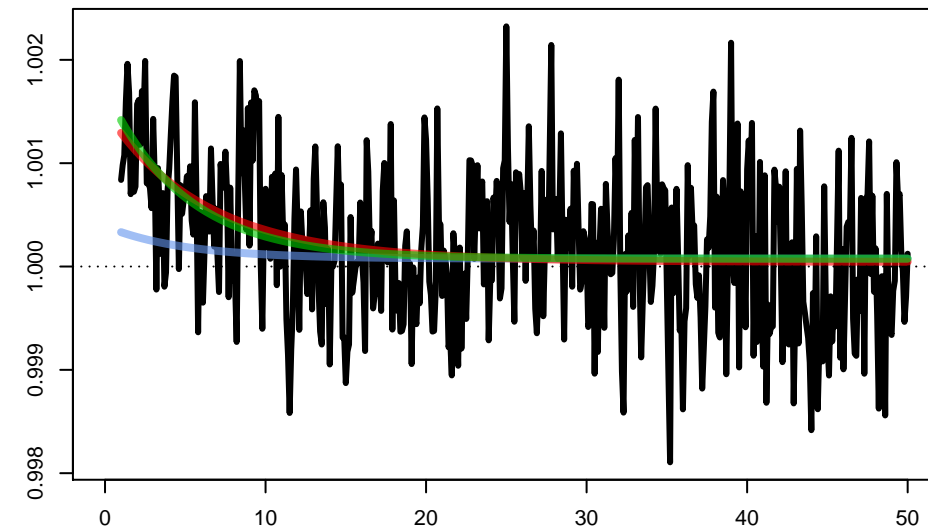

distance (cM)  
C.Jutland
