# Supplementary material for: Nationwide Genomic Study in Denmark Reveals Remarkable Population Homogeneity
Source: Oxford University Press journal article supplement (doi:10.1534/genetics.116.189241), 2016-08-18
Supplement: figures4.pdf [file figures4.pdf]

**nor vs nor**

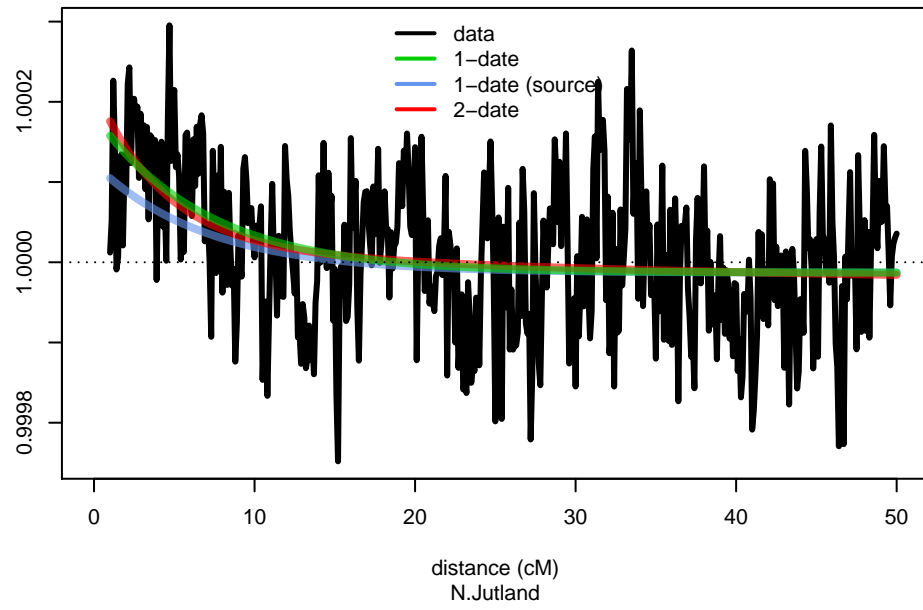

**nor vs swe**

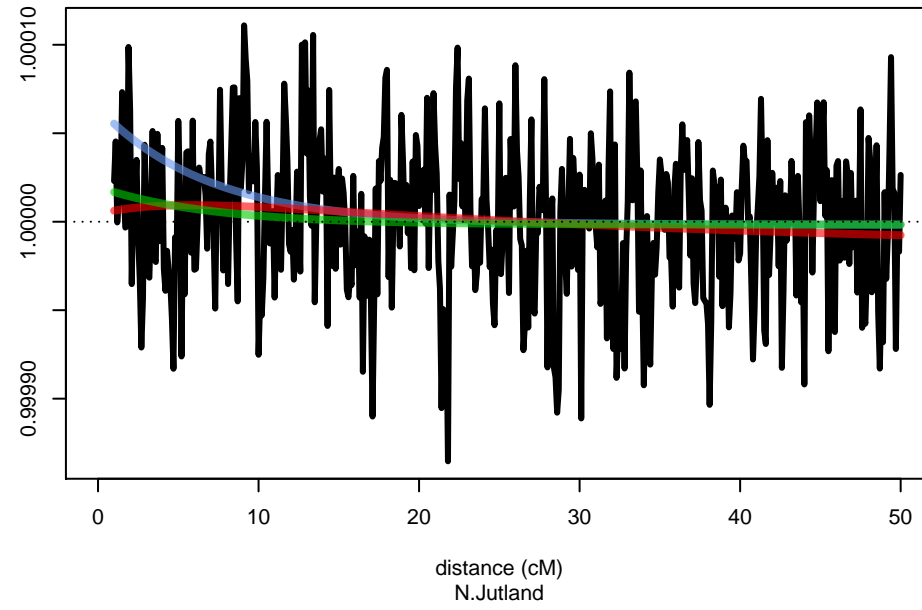

**nor vs ger**

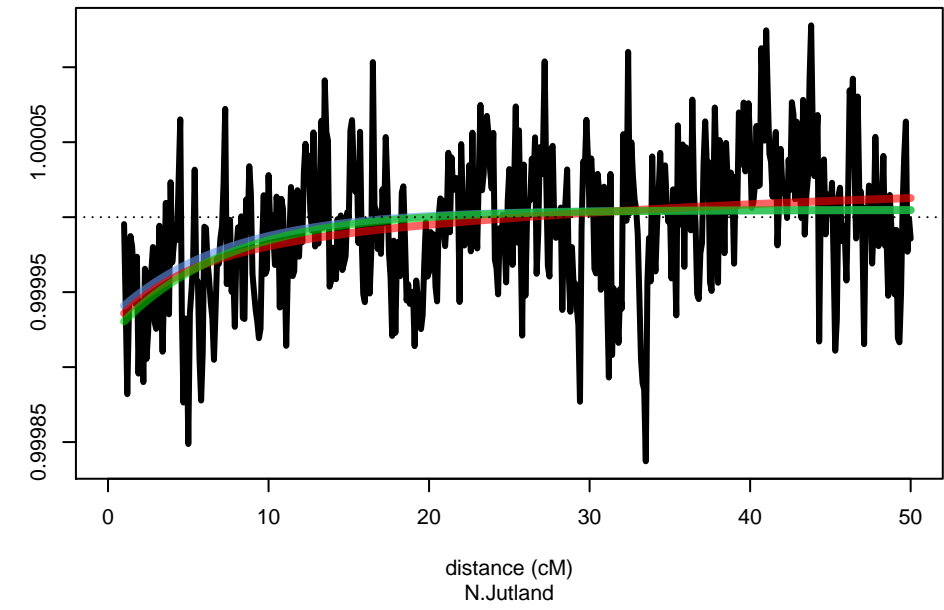

**nor vs bri**

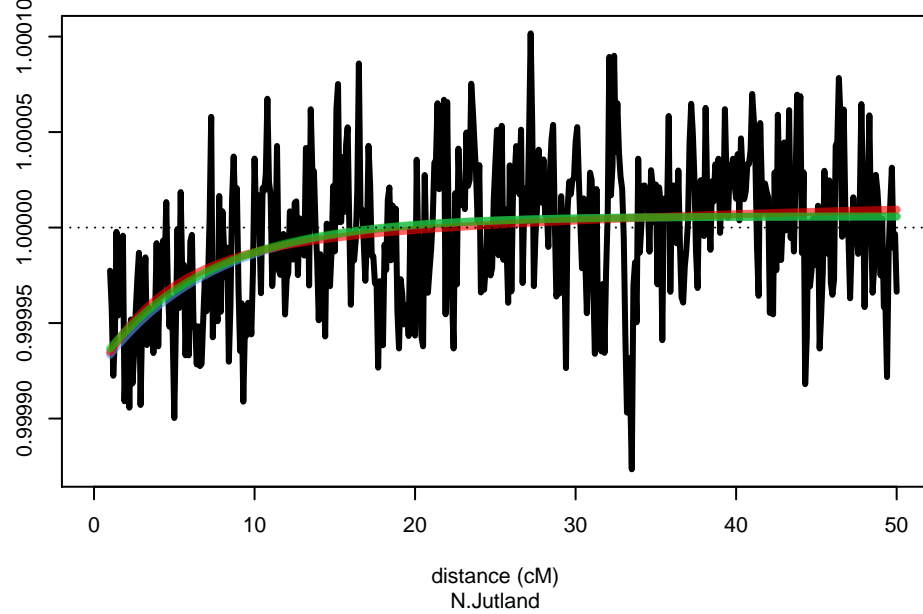

**nor vs fra**

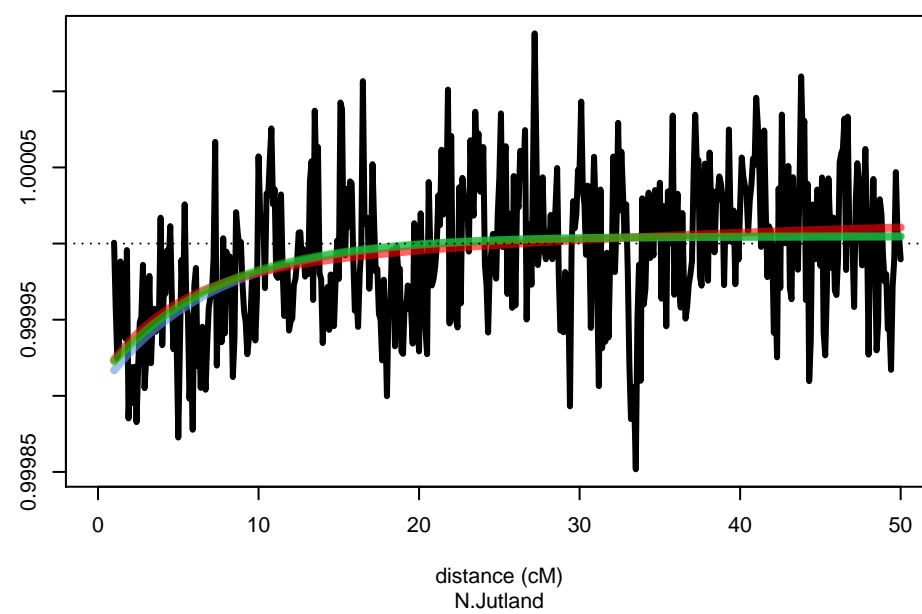

**swe vs nor**

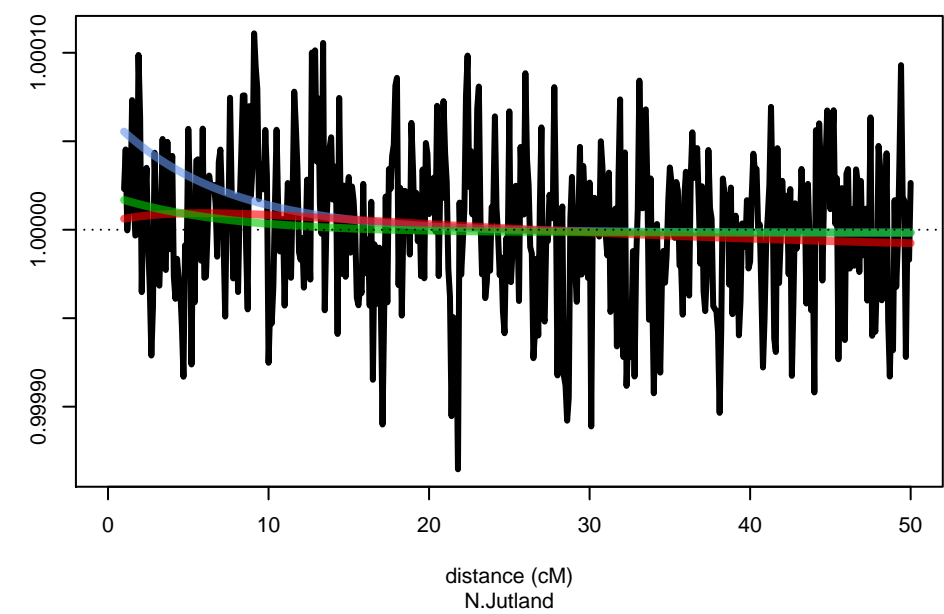

**swe vs swe**

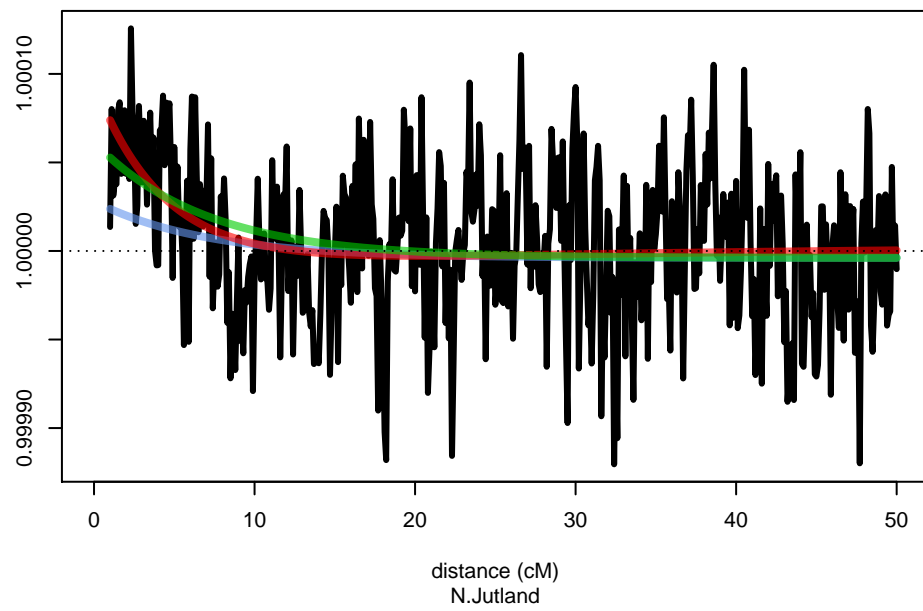

**swe vs ger**

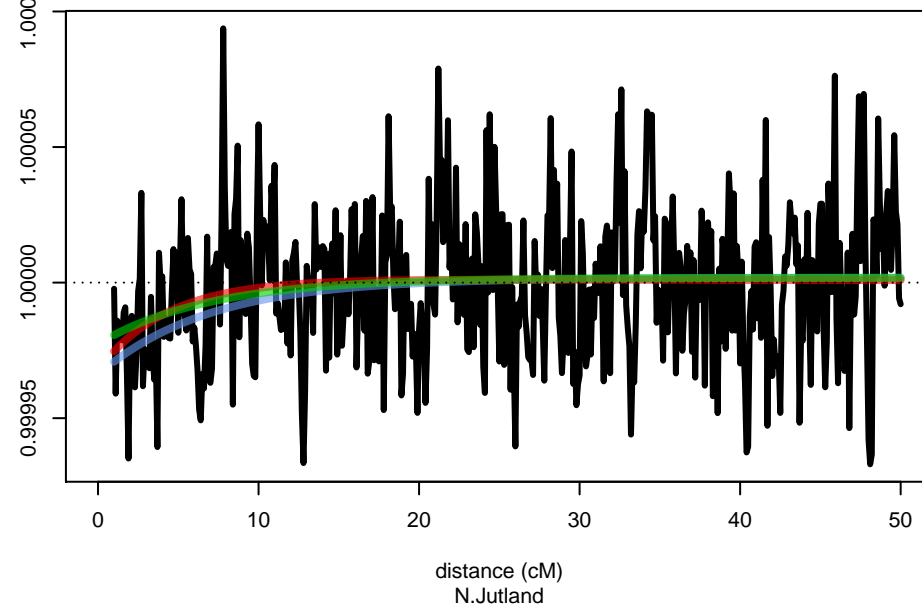

**swe vs bri**

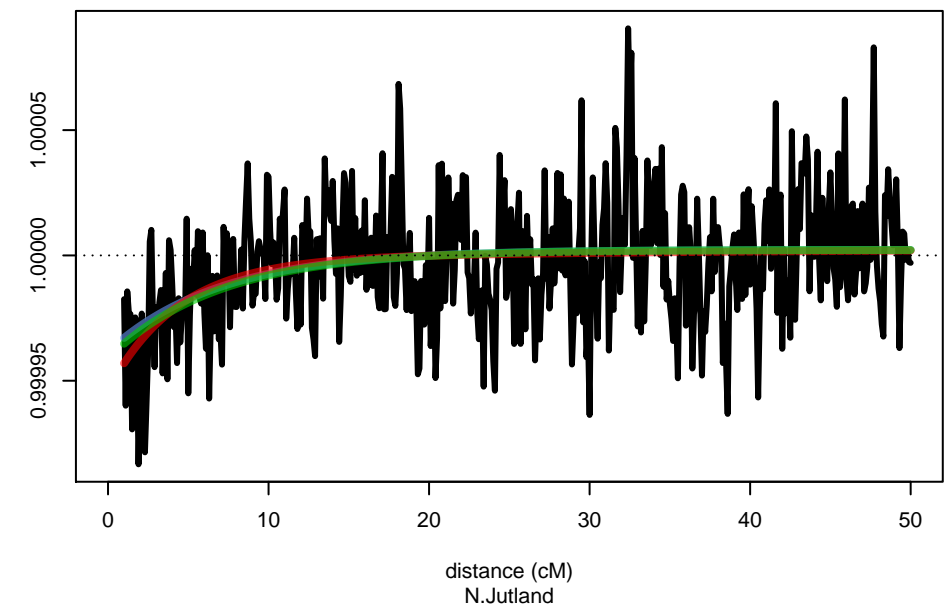

swe vs fra

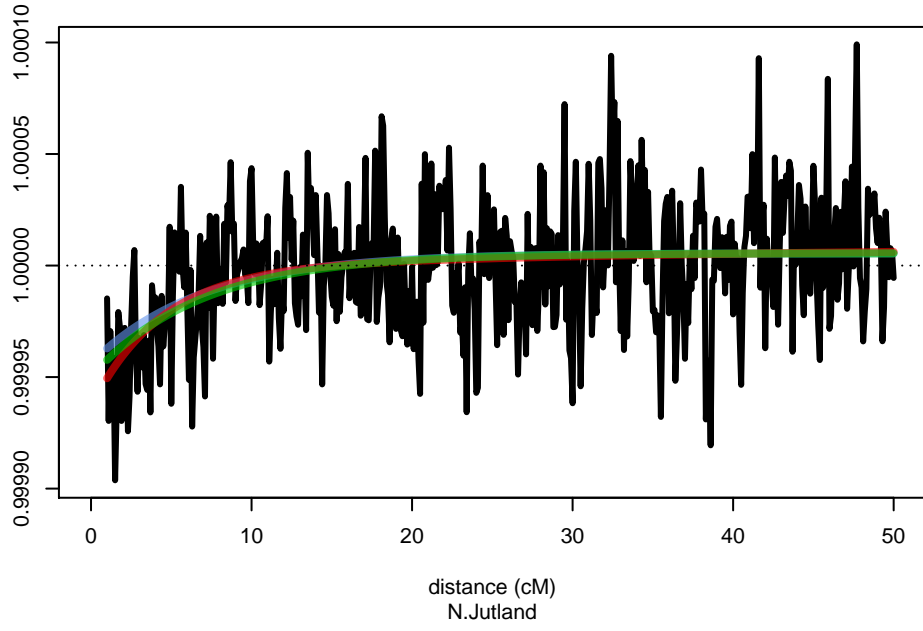

ger vs nor

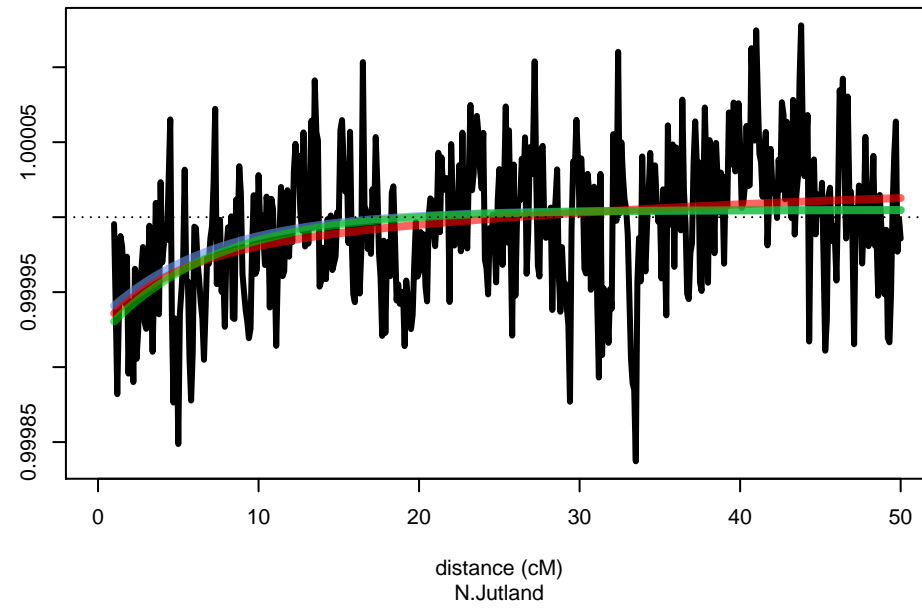

ger vs swe

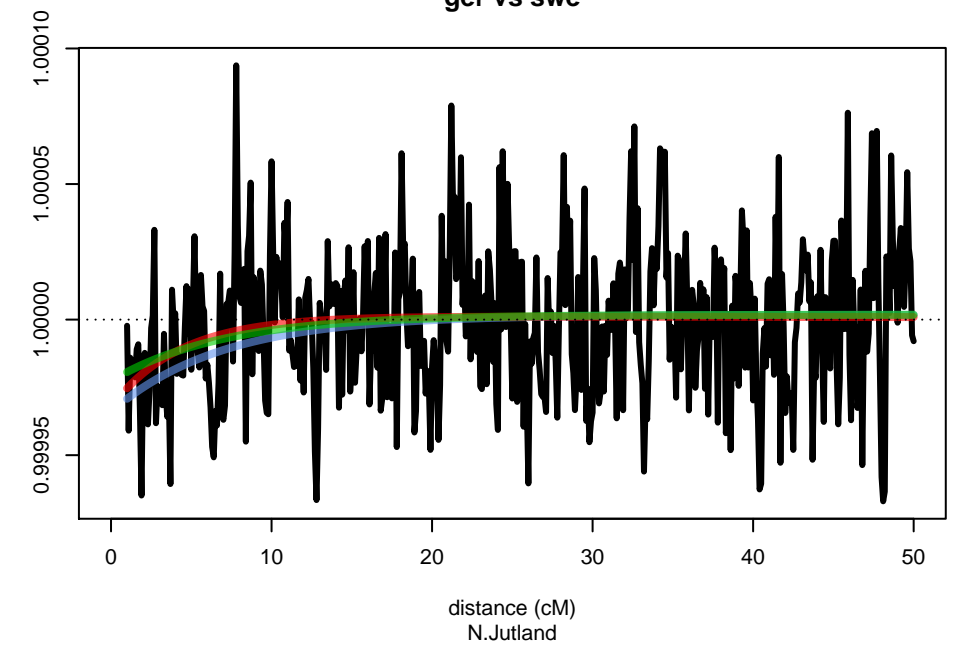

ger vs ger

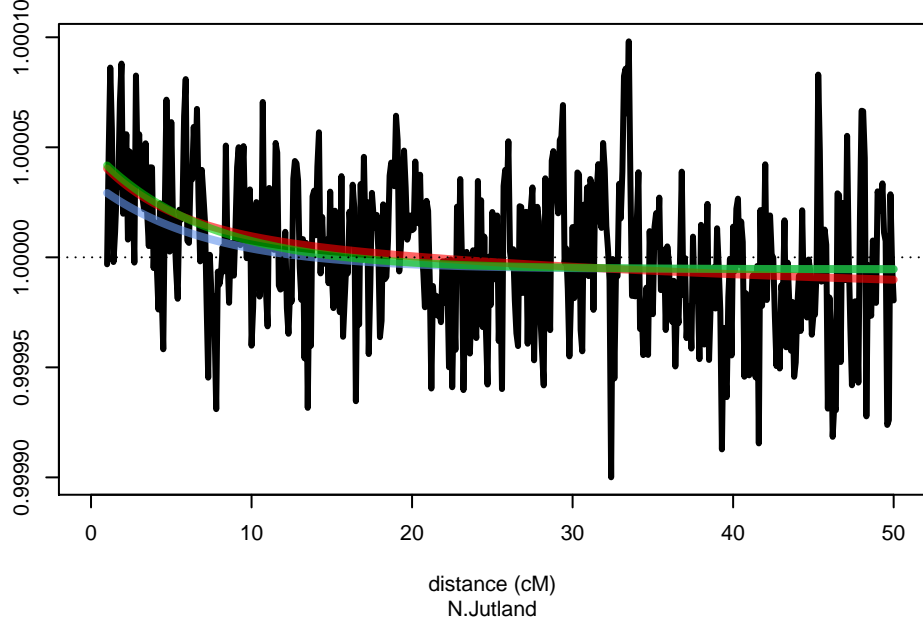

ger vs bri

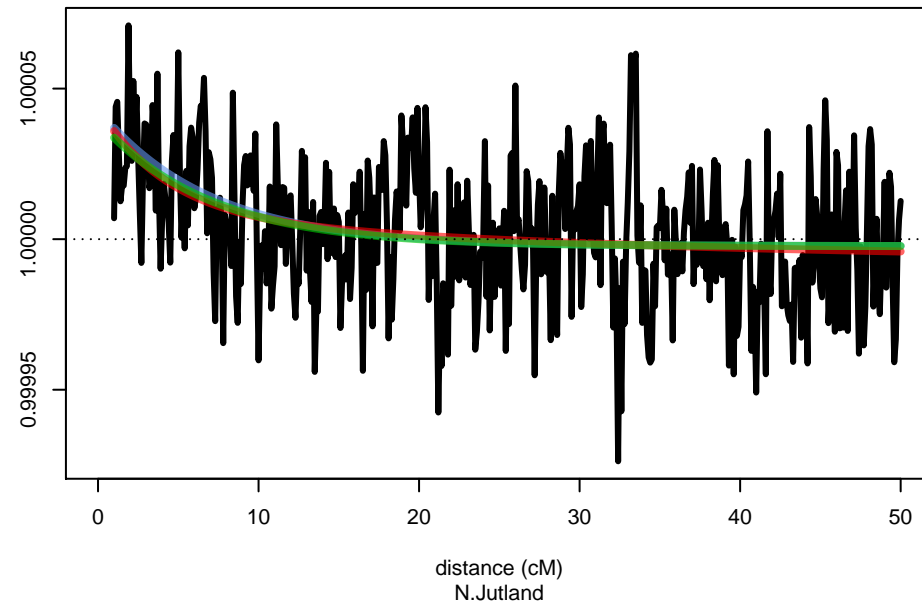

ger vs fra

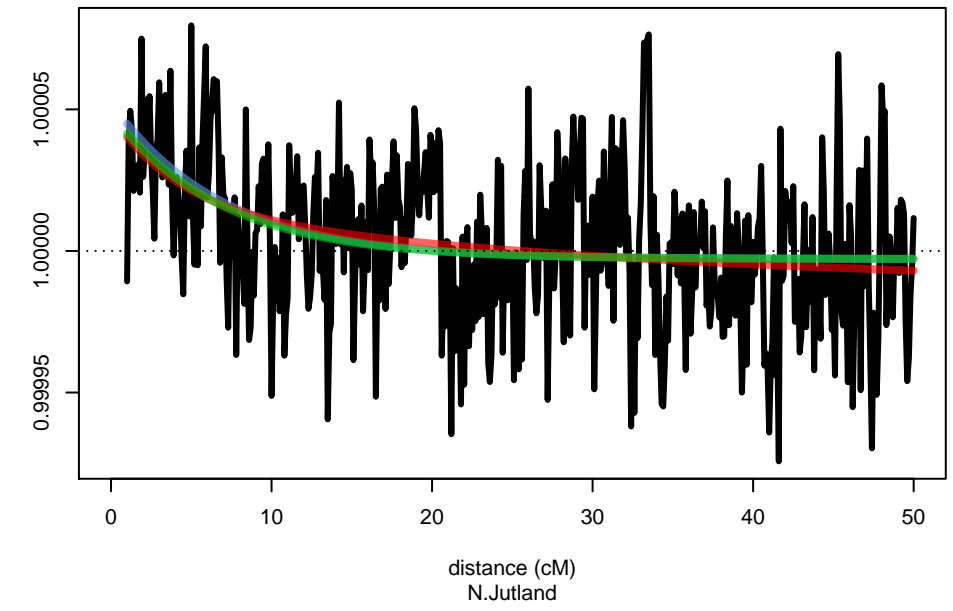

bri vs nor

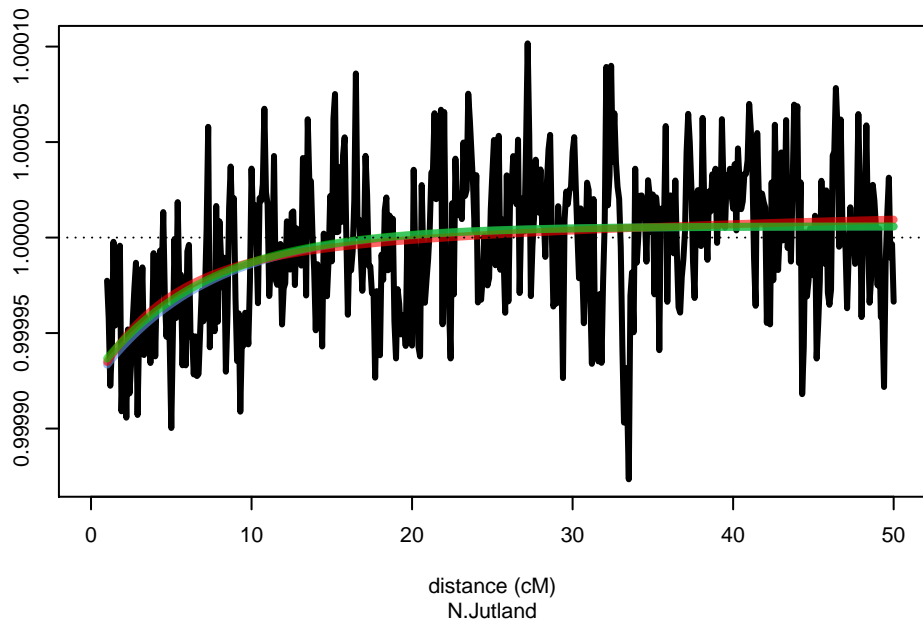

bri vs swe

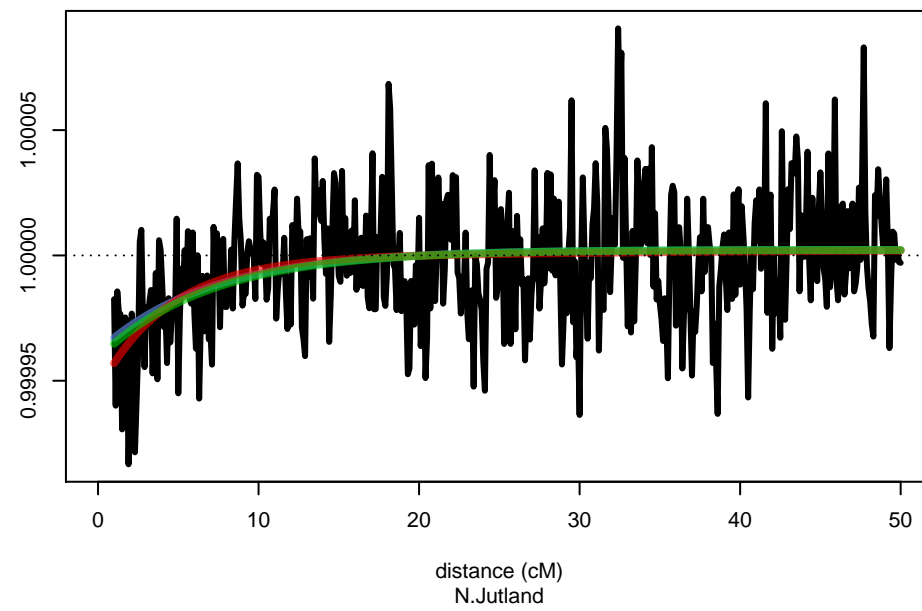

bri vs ger

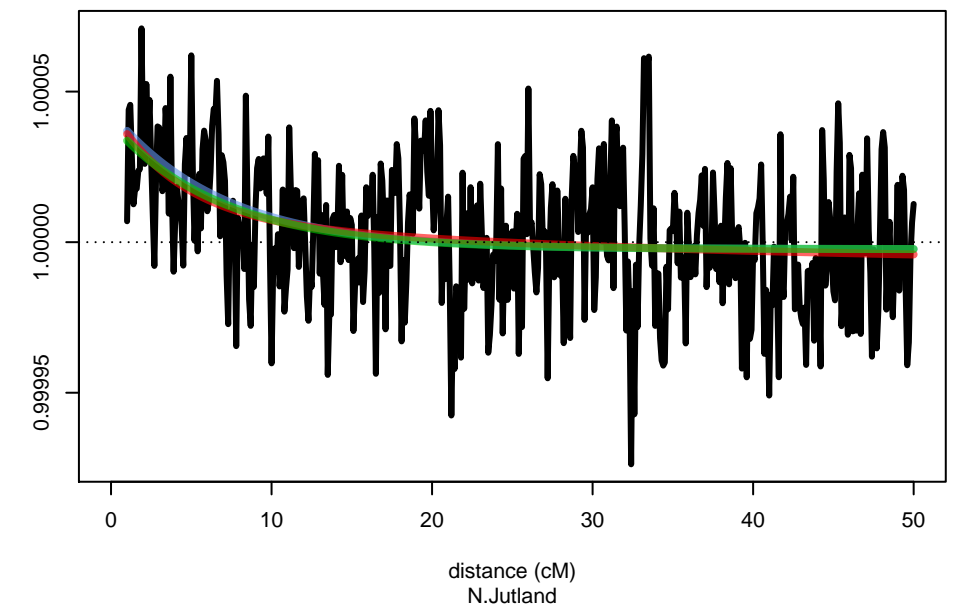

**bri vs bri**

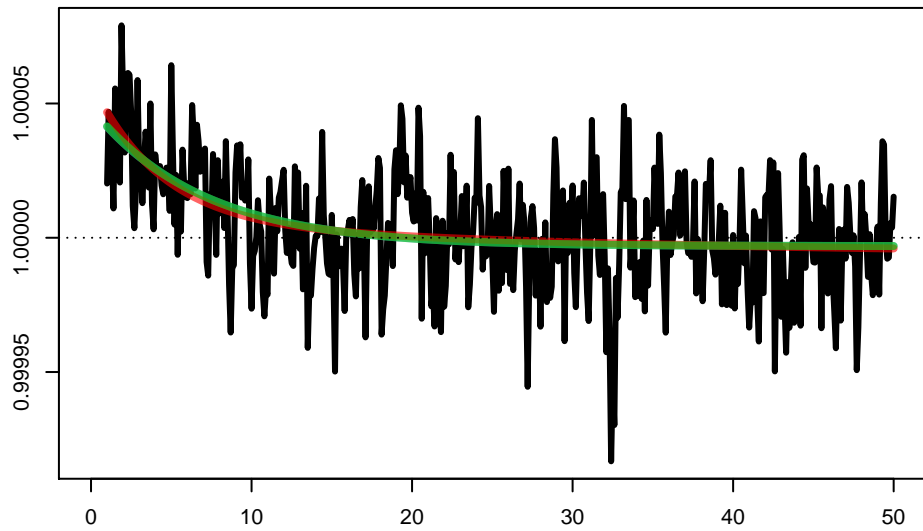

distance (cM)  
N.Jutland

**bri vs fra**

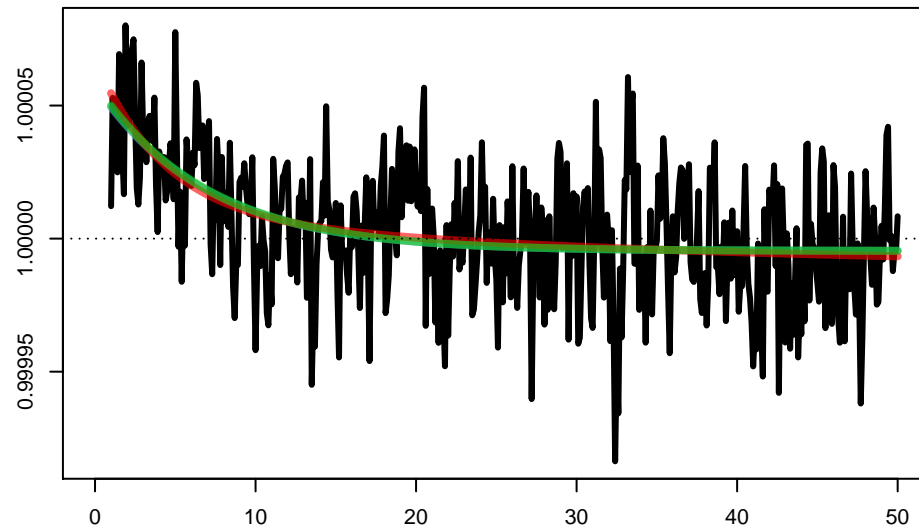

distance (cM)  
N.Jutland

**fra vs nor**

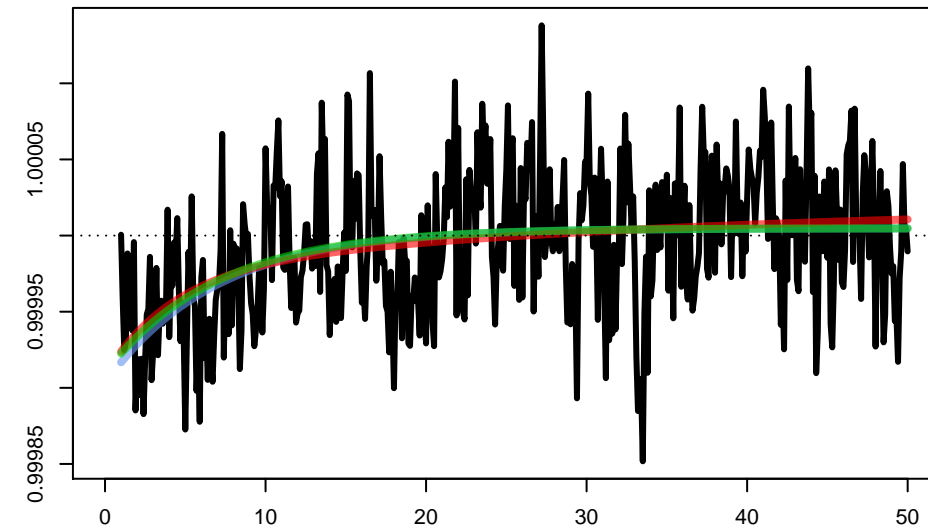

distance (cM)  
N.Jutland

**fra vs swe**

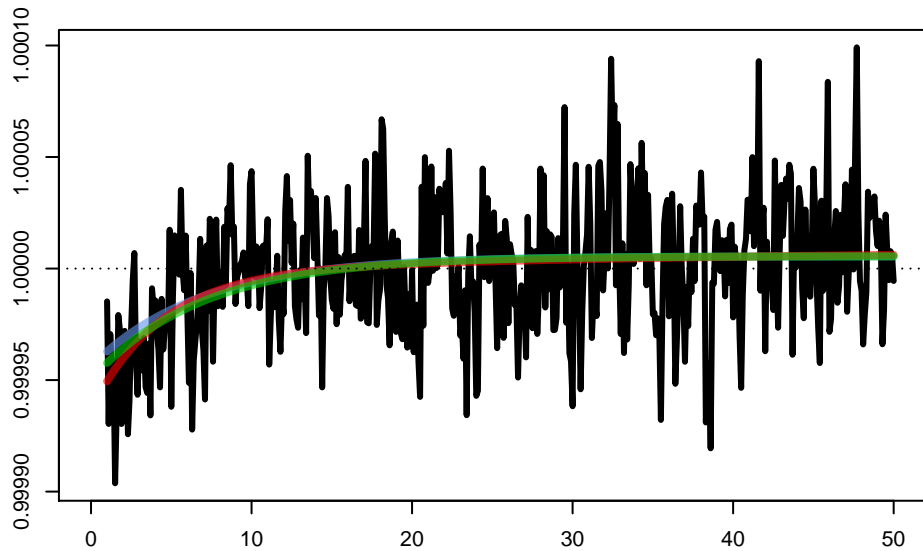

distance (cM)  
N.Jutland

**fra vs ger**

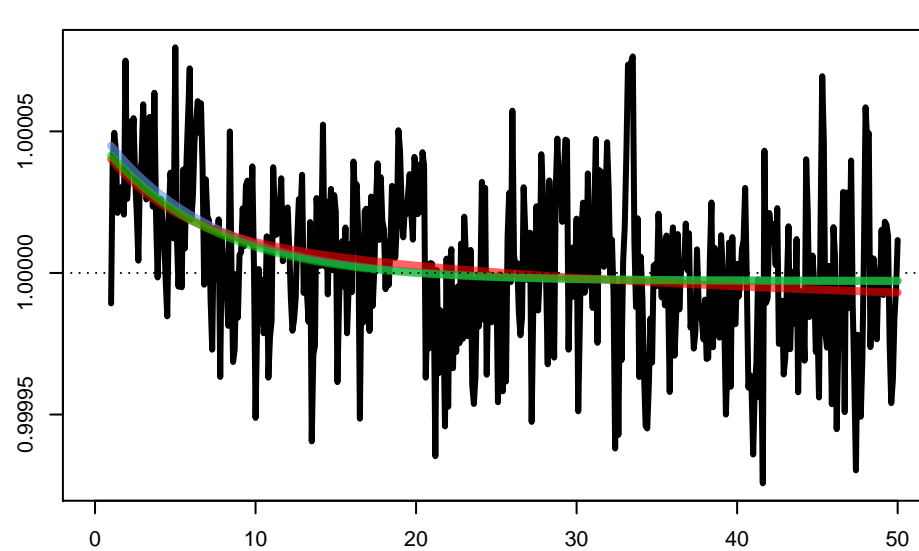

distance (cM)  
N.Jutland

**fra vs bri**

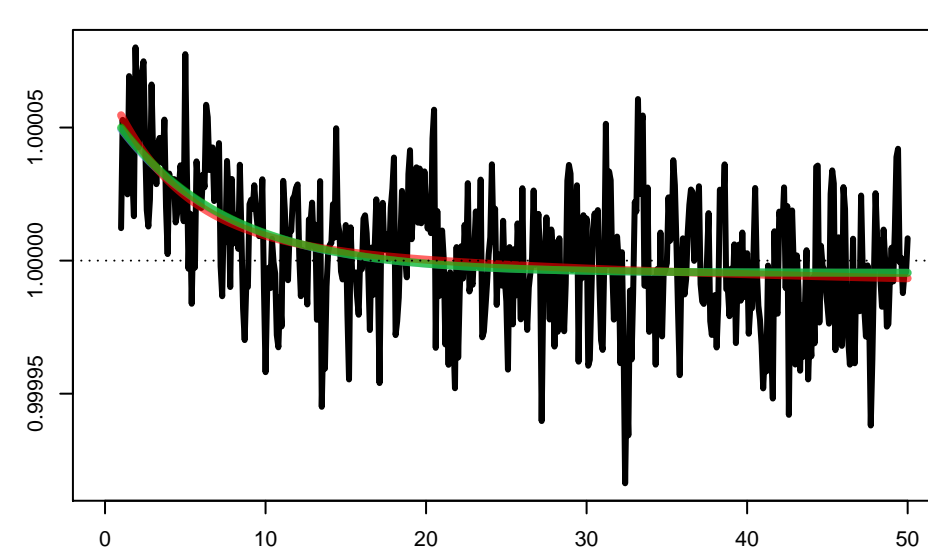

distance (cM)  
N.Jutland

**fra vs fra**

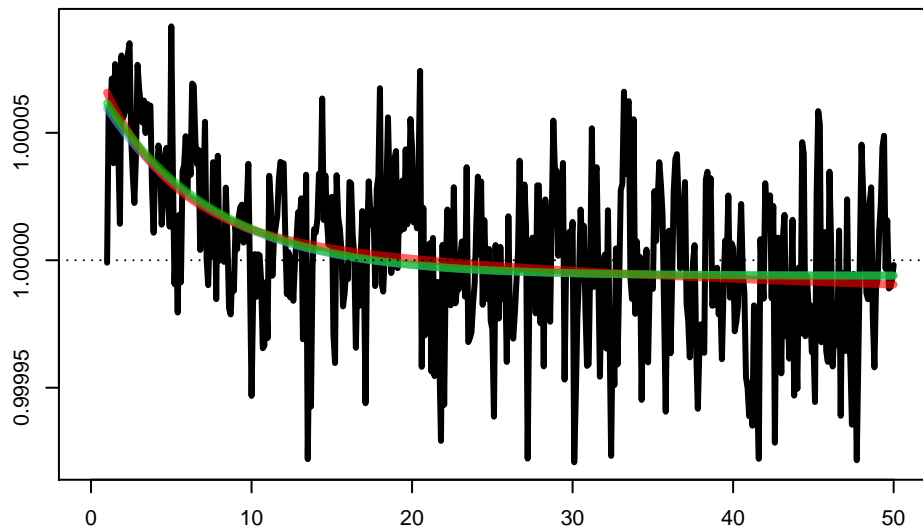

distance (cM)  
N.Jutland
