# Supplementary material for: Nationwide Genomic Study in Denmark Reveals Remarkable Population Homogeneity
Source: Oxford University Press journal article supplement (doi:10.1534/genetics.116.189241), 2016-08-18
Supplement: tables1.pdf [file tables1.pdf]

**Table S1.** Summary of the platform, original genomic build, number of reverse/ambiguous autosomal SNPs in each dataset, and final number of SNPs after flipping/removing reverse/ambiguous SNPs

|                                    | <b>Platform</b>       | <b>Original build</b> | <b>Reverse SNPs</b> | <b>Ambiguous SNPs</b> | <b>Final number of SNPs</b> |
|------------------------------------|-----------------------|-----------------------|---------------------|-----------------------|-----------------------------|
| <b>WAYF</b>                        | Illumina              | b37                   | 320                 | 3,740                 | 517,403                     |
| <b>POPRES</b>                      | Affymetrix            | b36                   | 510                 | 72,514                | 227,899                     |
| <b>ALS Finland</b>                 | Illumina              | b36                   | 75,000              | 1,784                 | 314,526                     |
| <b>Swedish Schizophrenia Study</b> | Affymetrix + Illumina | b37                   | 123                 | 1,615                 | 577,252                     |
| <b>NCNG</b>                        | Illumina              | b36                   | 269,427             | 2,572                 | 527,306                     |

WAYF: *Where Are You From?*
