# Supplementary material for: Nationwide Genomic Study in Denmark Reveals Remarkable Population Homogeneity
Source: Oxford University Press journal article supplement (doi:10.1534/genetics.116.189241), 2016-08-18
Supplement: tables2.pdf [file tables2.pdf]

**Table S2:** GLOBETROTTER admixture proportions (estimate  $\pm$  standard error) of each of six European clusters (BRI, FRA, POL, GER, SWE, NOR) in the six geographic regions of Denmark

|                        | <b>BRI</b>       | <b>FRA</b>      | <b>POL</b>      | <b>GER</b>      | <b>SWE</b>       | <b>NOR</b>       |
|------------------------|------------------|-----------------|-----------------|-----------------|------------------|------------------|
| <b>Capital</b>         | 43.49 $\pm$ 2.73 | 4.52 $\pm$ 1.93 | -               | 6.78 $\pm$ 1.21 | 29.80 $\pm$ 1.01 | 15.07 $\pm$ 0.77 |
| <b>Zealand</b>         | 40.37 $\pm$ 1.30 | 5.29 $\pm$ 1.32 | 6.28 $\pm$ 1.54 | 3.54 $\pm$ 1.19 | 29.70 $\pm$ 0.81 | 14.24 $\pm$ 0.34 |
| <b>Funen</b>           | 46.51 $\pm$ 1.83 | -               | 5.03 $\pm$ 2.24 | 3.72 $\pm$ 2.32 | 27.45 $\pm$ 1.30 | 15.28 $\pm$ 0.77 |
| <b>South Jutland</b>   | 48.16 $\pm$ 1.33 | -               | -               | 4.15 $\pm$ 1.05 | 30.20 $\pm$ 0.58 | 16.21 $\pm$ 0.40 |
| <b>Central Jutland</b> | 43.63 $\pm$ 1.14 | 5.42 $\pm$ 0.85 | -               | 4.67 $\pm$ 0.61 | 28.64 $\pm$ 0.50 | 16.61 $\pm$ 0.32 |
| <b>North Jutland</b>   | 44.87 $\pm$ 1.34 | 4.16 $\pm$ 1.13 | -               | 3.04 $\pm$ 0.85 | 29.16 $\pm$ 0.46 | 18.76 $\pm$ 0.45 |
