# Supplementary figures and images for: Nationwide Genomic Study in Denmark Reveals Remarkable Population Homogeneity
Source: Oxford University Press journal article supplement (doi:10.1534/genetics.116.189241), 2016-08-18

K=2

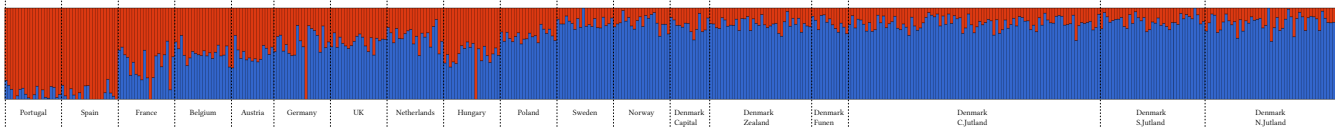

K=3

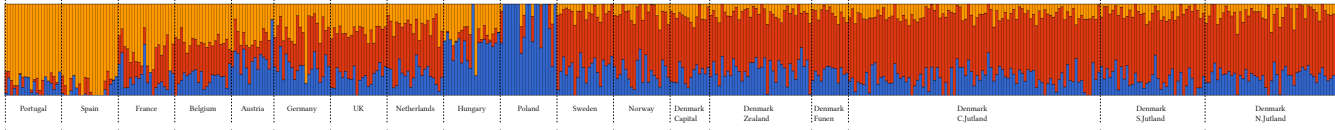

K=4

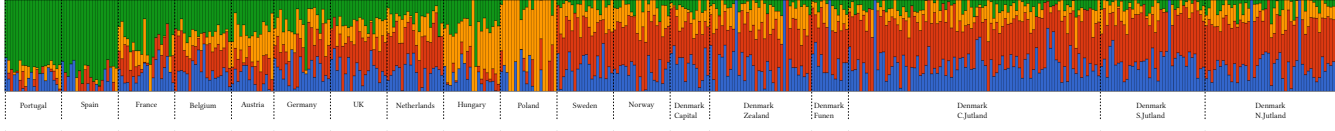

K=5

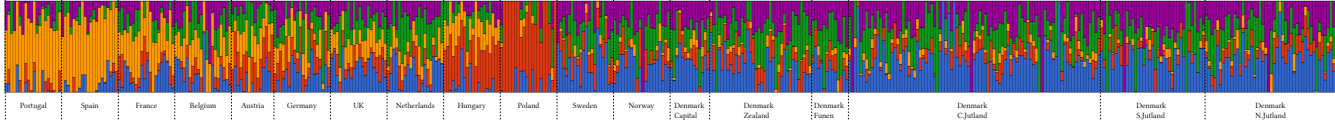

K=6

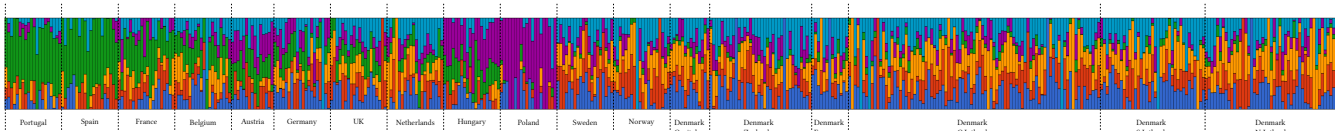

K=7

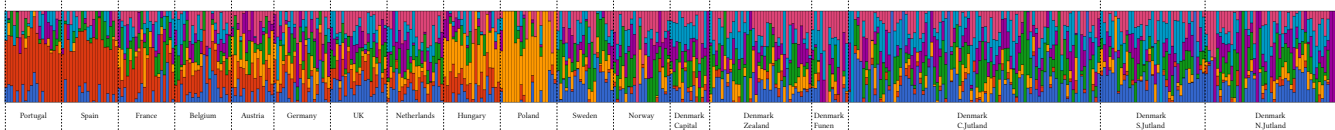

K=8

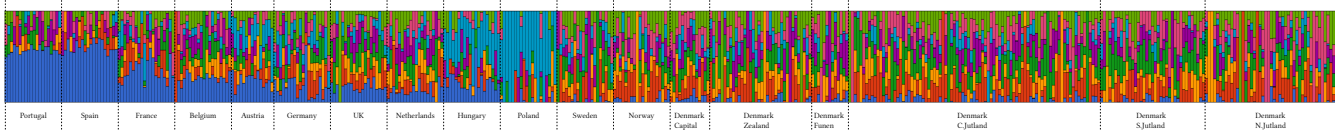

K=9

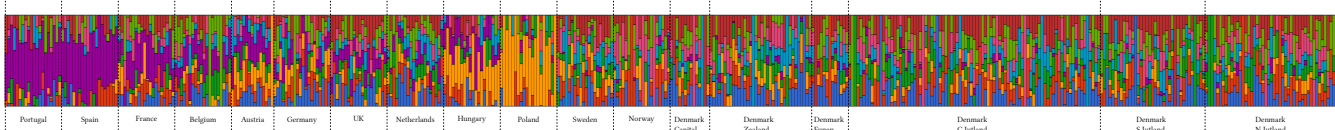

Supplement: figures5.pdf [file figures5.pdf]

# Relatedness among 406 Danish samples

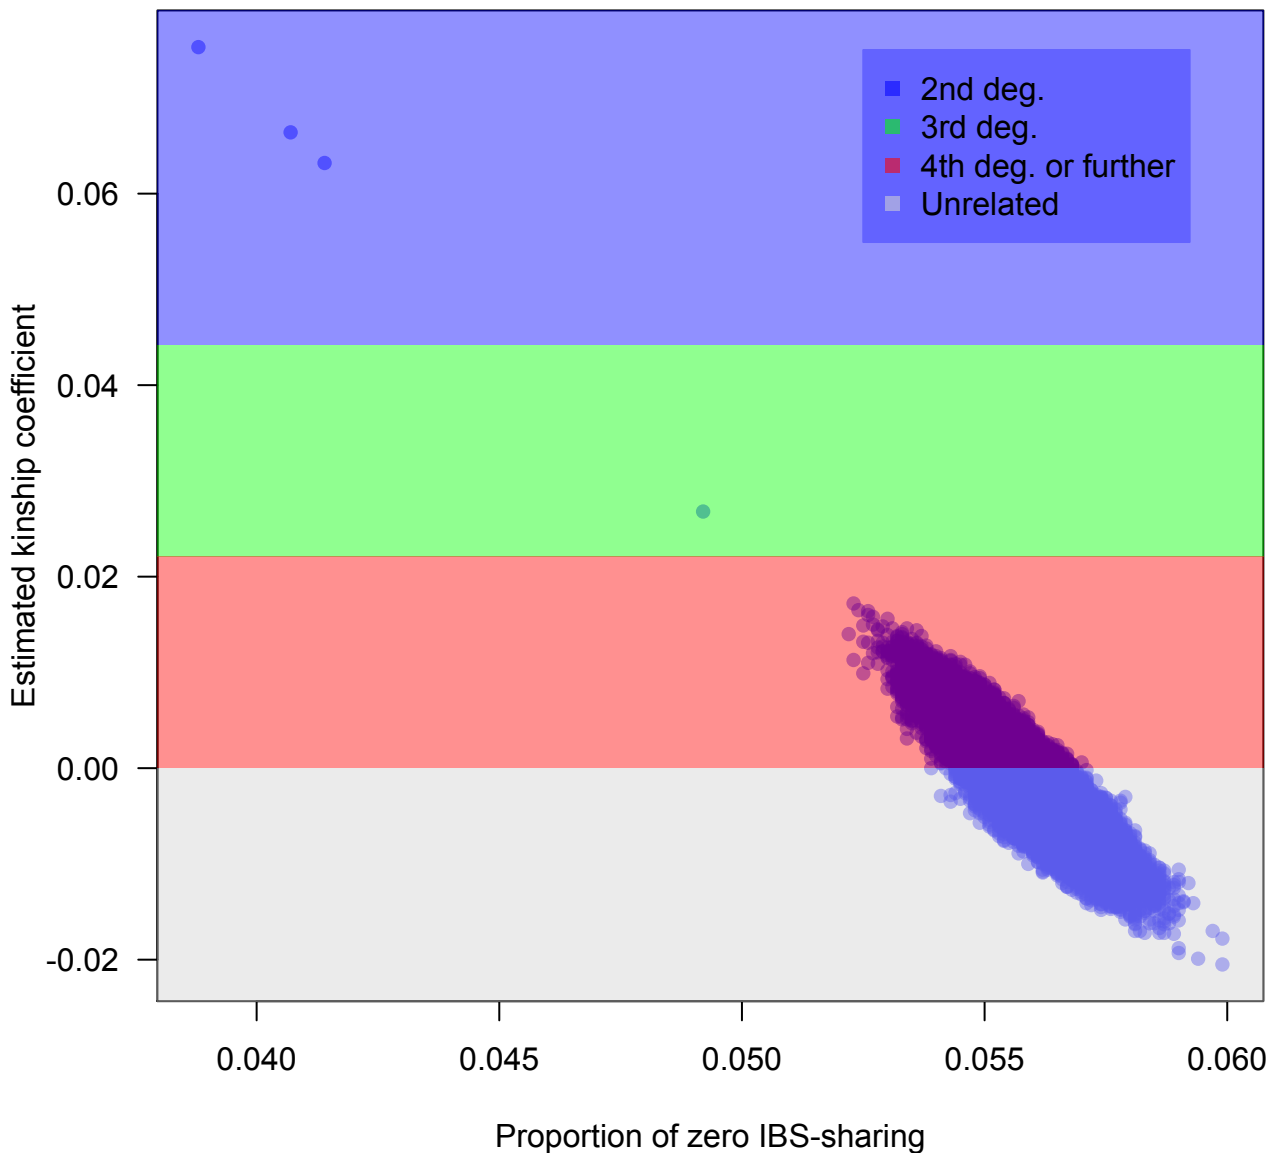

Supplement: figures6.pdf [file figures6.pdf]

**A**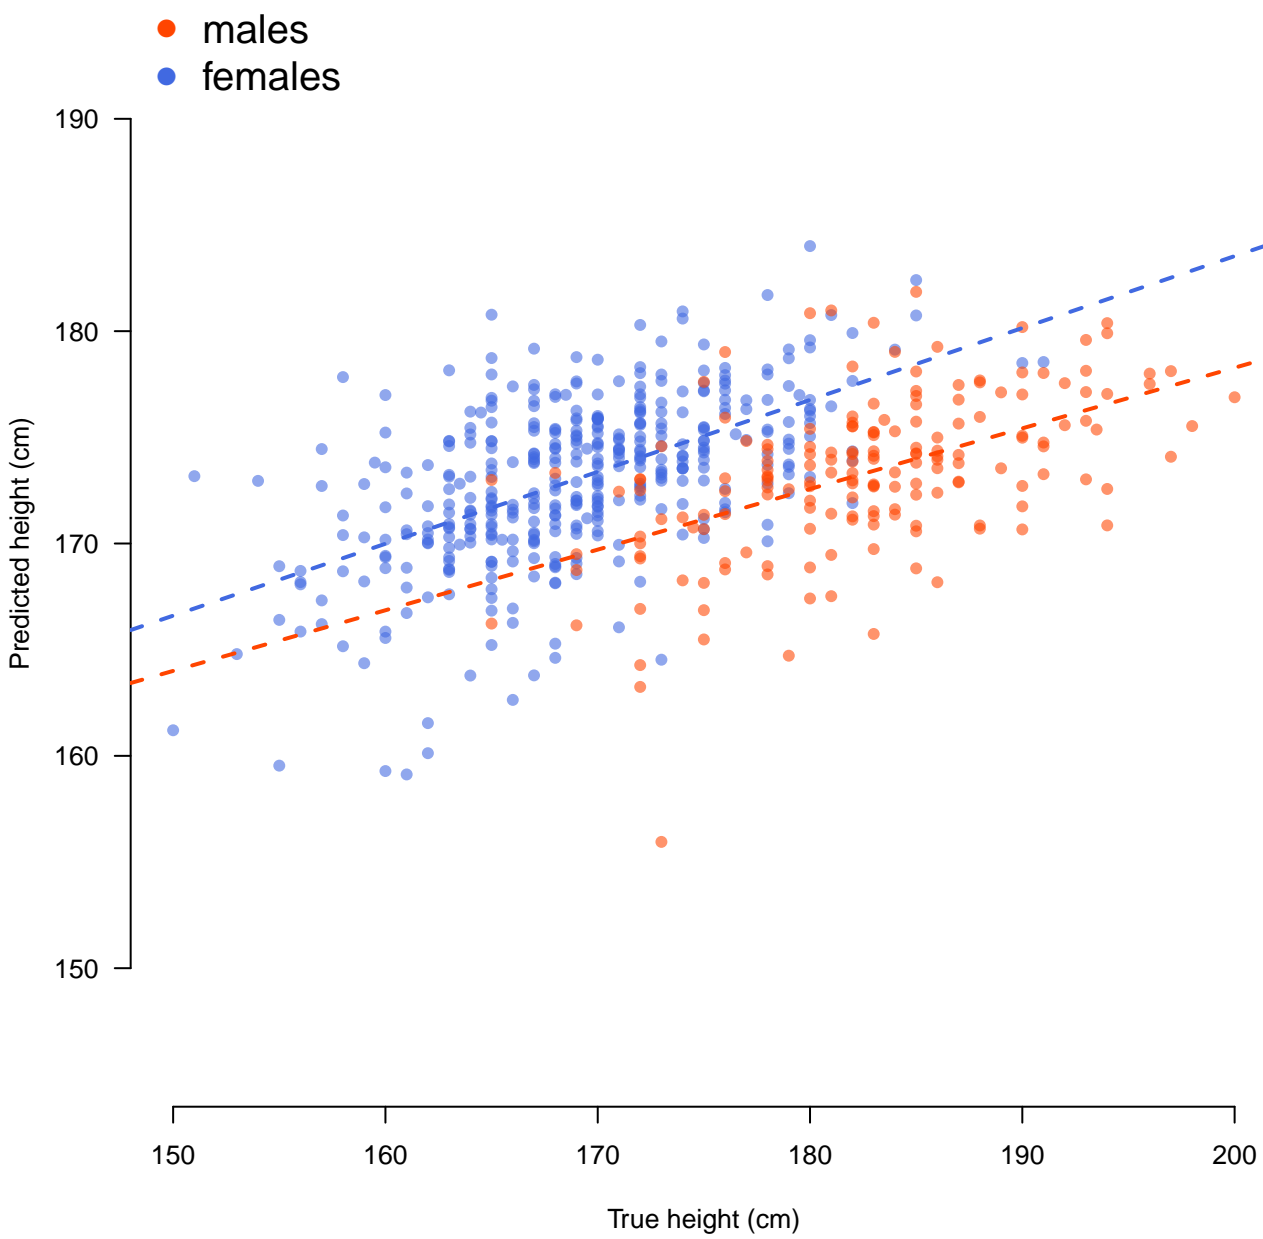**B**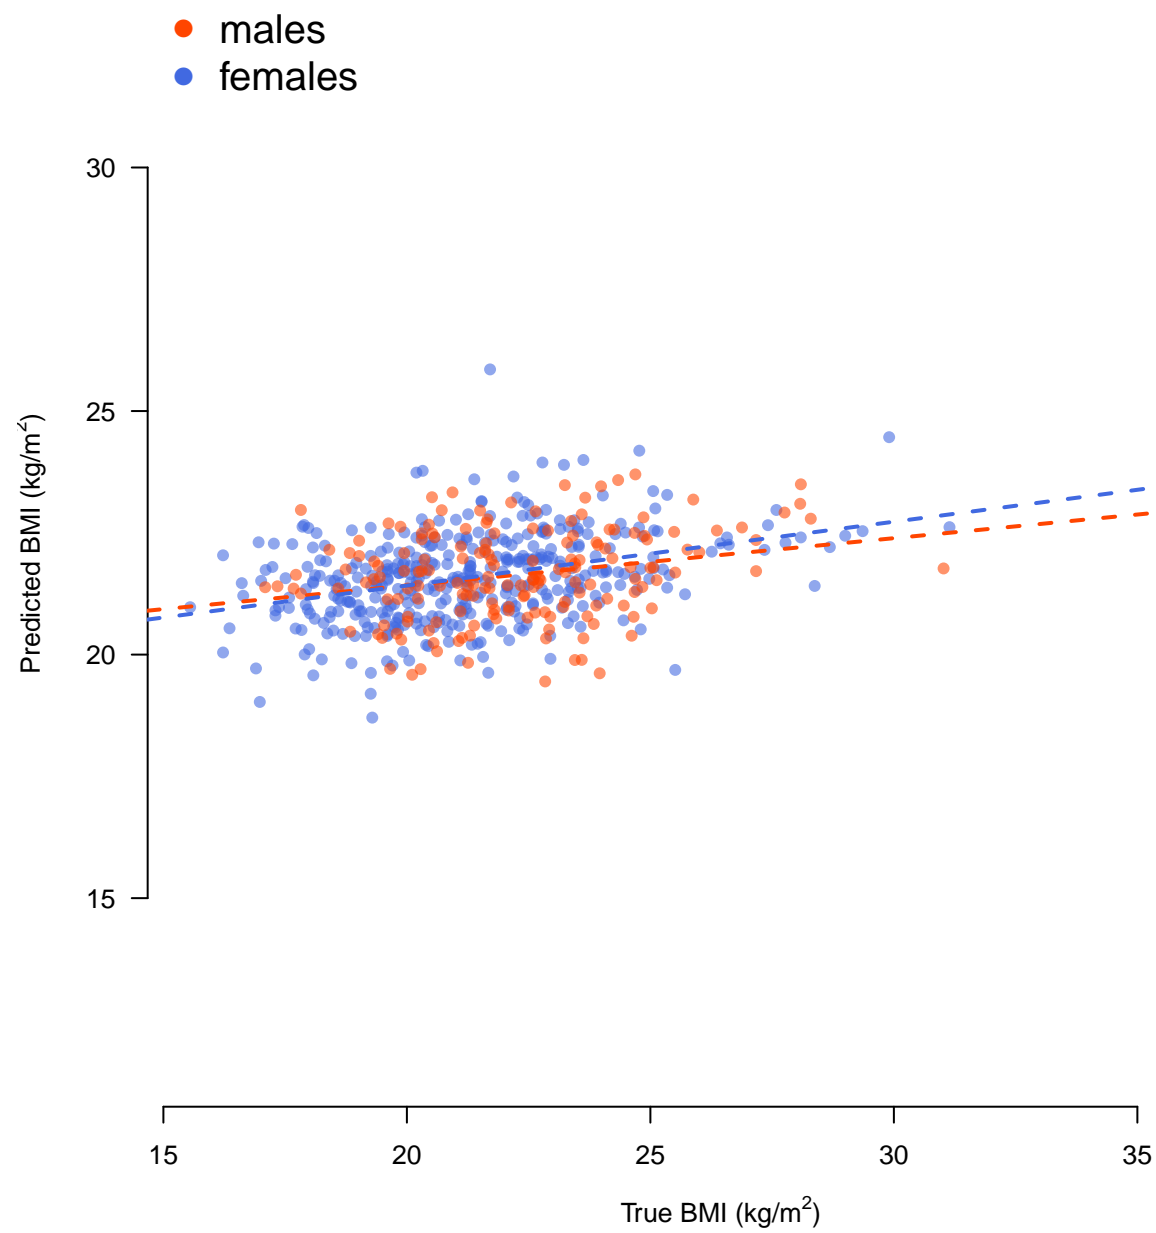**C**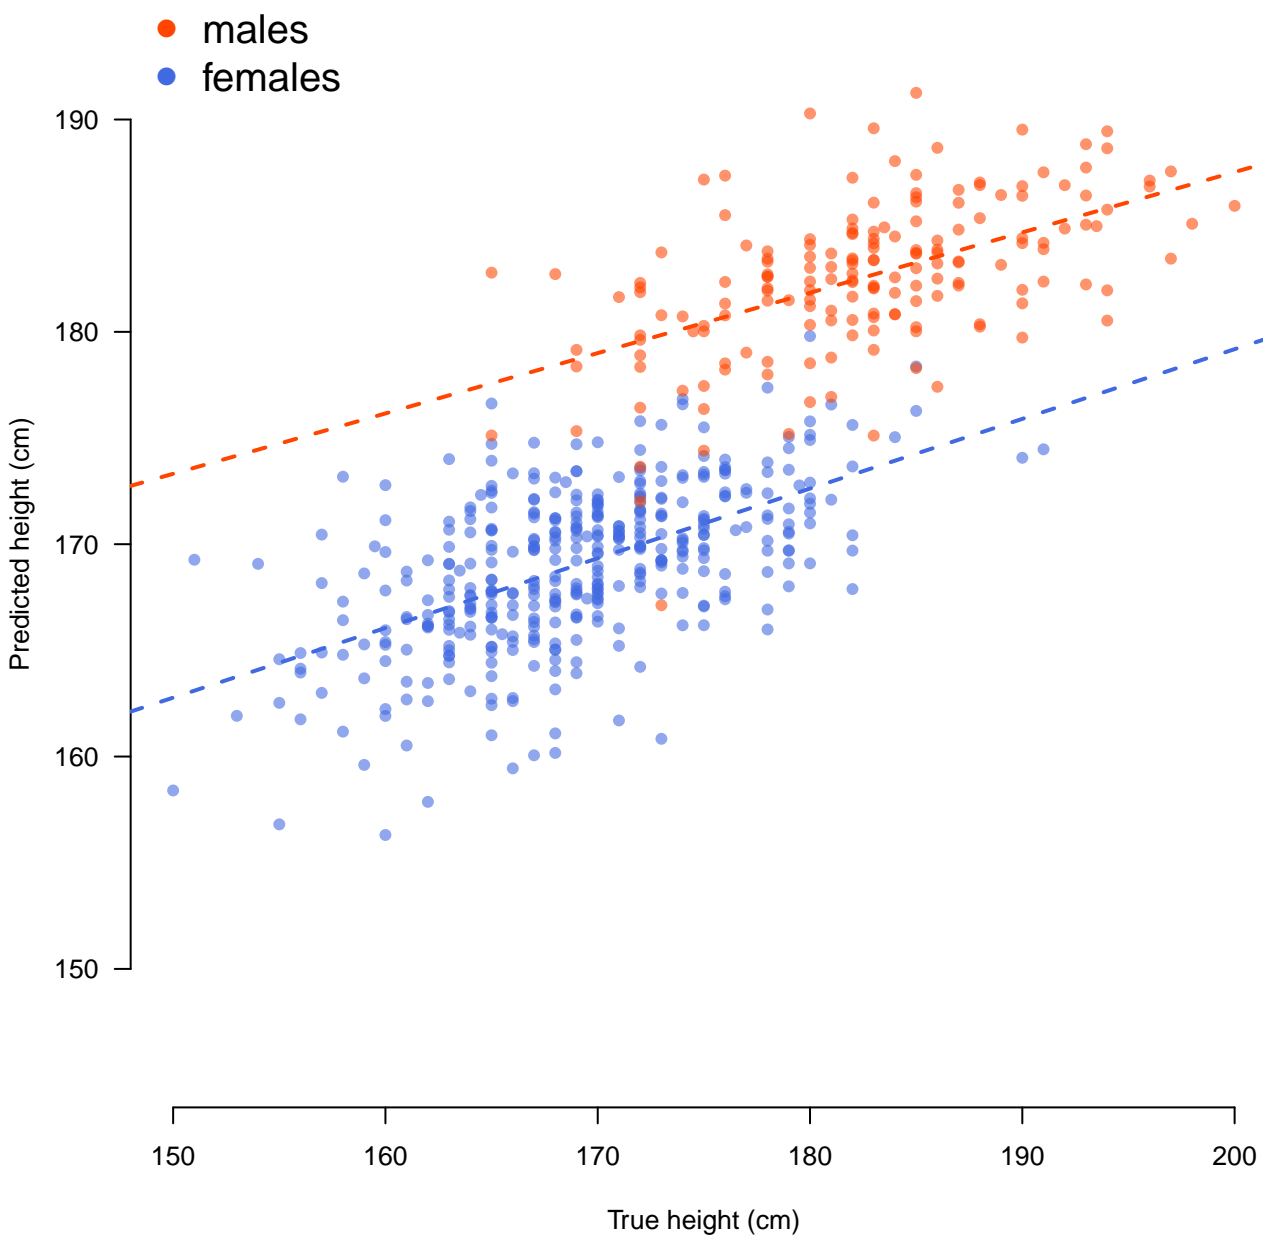**D**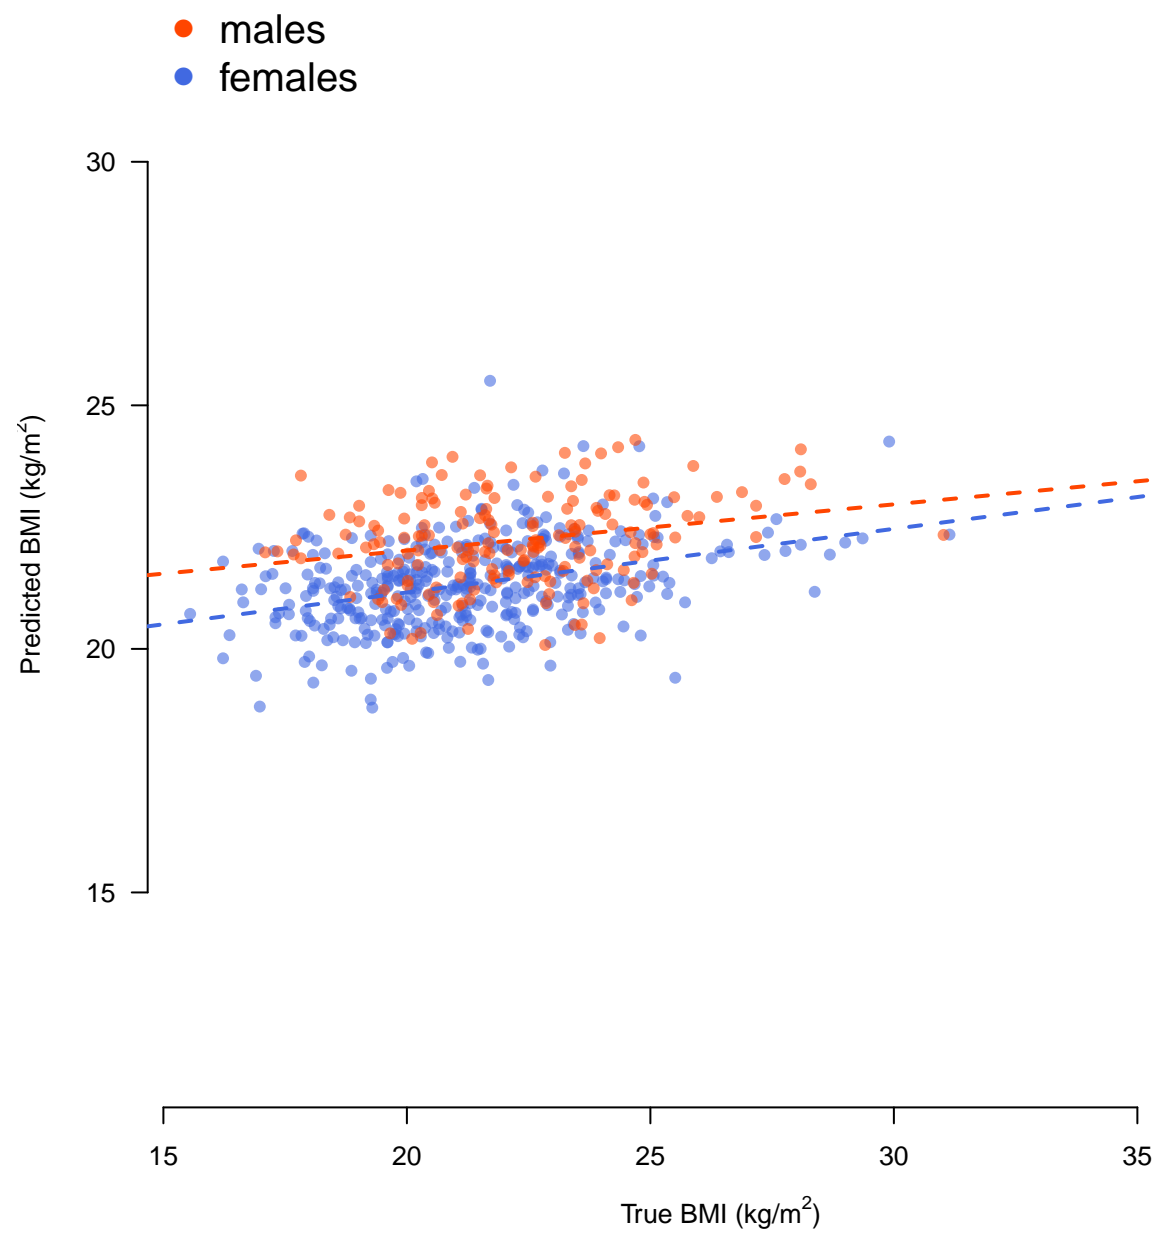

Supplement: figures7.pdf [file figures7.pdf]
